# Supplementary material for: Evaluation of the Expression of Amine Oxidase Proteins in Breast Cancer
Source: Int J Mol Sci. 2017 Dec 20;18(12):2775. doi: 10.3390/ijms18122775 (PMC5751373; doi:10.3390/ijms18122775)
Supplement: Supplementary file 1 [file ijms-18-02775-s001.xlsx]

## Sheet: (A)cbiop genelist 
Gene	Cytoband	Mean mRNA expression(Altered)	Mean mRNA expression(Unaltered)	ratio	Standard deviation of mRNA expression(Altered)	Standard deviation of mRNA expression(Unaltered)	p-Value	q-Value
CYBRD1	2q31.1	12.89	11.89	1.0841	1.09	1.43	7.7e-18	9.84e-14
ANO6	12q12	11.37	10.88	1.04504	0.56	0.66	2.84e-17	1.82e-13
TTC28	22q12.1	9.18	8.6	1.06744	0.67	0.82	8.02e-17	3.42e-13
ARHGAP20	11q22.3-q23.1	5.99	4.98	1.20281	1.18	1.36	1.53e-16	4.88e-13
LPAR1	9q31.3	8.89	8.14	1.09214	0.9	1.12	6.48e-16	1.66e-12
FLT1	13q12.3	10.39	9.78	1.06237	0.76	0.8	2.13e-15	4.54e-12
CRTAP	3p22.3	12.03	11.65	1.03262	0.48	0.49	4.38e-15	8e-12
PLSCR4	3q24	9.01	8.25	1.09212	0.96	1.01	6.76e-15	1.06e-11
RBMS2	12q13.3	9.88	9.5	1.04	0.47	0.58	7.48e-15	1.06e-11
NRP1	10p11.22	11.43	10.78	1.0603	0.82	0.78	8.65e-15	1.11e-11
ATXN1	6p22.3	10.35	9.87	1.04863	0.58	0.8	9.59e-15	1.11e-11
TONSL	8q24.3	7.67	8.46	0.906619	1	1.06	1.08e-14	1.12e-11
RFC2	7q11.23	9.19	9.57	0.960293	0.46	0.59	1.14e-14	1.12e-11
DAZAP1	19p13.3	10.33	10.64	0.970865	0.4	0.48	1.86e-14	1.69e-11
CDH13	16q23.3	8.66	7.96	1.08794	0.91	0.85	2.22e-14	1.89e-11
SEMA6D	15q21.1	7.63	6.46	1.18111	1.54	1.53	4.03e-14	3.22e-11
SH3D19	4q31.3	10.5	9.97	1.05316	0.69	0.78	4.56e-14	3.26e-11
NEDD4	15q21.3	9.18	8.68	1.0576	0.63	0.86	4.59e-14	3.26e-11
RECQL4	8q24.3	7.79	8.65	0.900578	1.13	1.17	5.92e-14	3.98e-11
NSUN5	7q11.23	8.82	9.22	0.956616	0.51	0.62	6.41e-14	4.09e-11
MCC	5q22.2	9.69	9.08	1.06718	0.76	1.13	6.77e-14	4.12e-11
TBRG4	7p13	9.75	10.09	0.966303	0.45	0.57	7.67e-14	4.46e-11
ELK3	12q23.1	9.15	8.58	1.06643	0.74	0.9	8.06e-14	4.48e-11
HNRNPA2B1	7p15.2	13.68	13.9	0.984173	0.29	0.33	8.72e-14	4.64e-11
ADGRF5	6p12.3	9.87	9.21	1.07166	0.89	0.85	1.14e-13	5.82e-11
PJA2	5q21.3	11.76	11.37	1.0343	0.5	0.7	1.18e-13	5.82e-11
SLIT3	5q34-q35.1	9.99	8.98	1.11247	1.37	1.25	1.36e-13	6.46e-11
JCAD	10p11.23	10.3	9.6	1.07292	0.95	0.88	1.85e-13	8.15e-11
DENND5A	11p15.4	10.66	10.36	1.02896	0.4	0.51	1.85e-13	8.15e-11
ITM2B	13q14.2	13.41	13.03	1.02916	0.5	0.6	1.94e-13	8.27e-11
CNRIP1	2p14	7.75	7.04	1.10085	0.97	0.88	2.74e-13	1.1e-10
GALNT15	3p25.1	8.05	6.8	1.18382	1.73	1.54	2.76e-13	1.1e-10
FRAT2	10q24.1	8.27	8.65	0.956069	0.51	0.61	3.05e-13	1.18e-10
CCPG1	15q21.3	11.26	10.85	1.03779	0.54	0.67	3.42e-13	1.28e-10
PDCD2L	19q13.11	6.87	7.23	0.950207	0.46	0.7	4.65e-13	1.7e-10
DAB2	5p13.1	10.97	10.32	1.06298	0.92	0.82	5.27e-13	1.82e-10
RPP38	10p13	8.23	8.52	0.965962	0.37	0.55	5.35e-13	1.82e-10
CSF1	1p13.3	9.54	8.91	1.07071	0.85	1.06	5.4e-13	1.82e-10
CD93	20p11.21	11.3	10.64	1.06203	0.93	0.85	5.82e-13	1.87e-10
OSMR	5p13.1	10.1	9.4	1.07447	0.94	1.23	5.84e-13	1.87e-10
PTPRG	3p14.2	9.42	8.79	1.07167	0.84	1.15	6.53e-13	1.95e-10
ECM2	9q22.31	9.23	8.25	1.11879	1.38	1.24	6.83e-13	1.95e-10
PTPRM	18p11.23	9.99	9.37	1.06617	0.85	0.89	6.87e-13	1.95e-10
TNS1	2q35	11.95	11.26	1.06128	0.98	0.85	6.92e-13	1.95e-10
SMIM3	5q33.1	9.14	8.53	1.07151	0.86	0.8	7.11e-13	1.95e-10
CASC4	15q15.3	11.68	11.35	1.02907	0.44	0.62	7.13e-13	1.95e-10
PHLDB2	3q13.2	9.63	8.92	1.0796	0.98	1.19	7.16e-13	1.95e-10
MCM7	7q22.1	10.64	11.16	0.953405	0.72	0.78	9.57e-13	2.55e-10
TGFBR2	3p24.1	11.4	10.69	1.06642	1	0.97	1.04e-12	2.67e-10
SNRPA1	15q26.3	8.57	8.98	0.954343	0.55	0.72	1.05e-12	2.67e-10
FEN1	11q12.2	9.19	9.7	0.947423	0.7	0.78	1.09e-12	2.73e-10
POLE	12q24.33	9.64	10	0.964	0.51	0.57	1.43e-12	3.52e-10
AXL	19q13.2	10.51	9.91	1.06054	0.85	0.85	1.46e-12	3.52e-10
ZCCHC24	10q22.3	9.96	9.32	1.06867	0.91	1.02	1.62e-12	3.83e-10
DKC1	Xq28	10.45	10.75	0.972093	0.42	0.6	1.87e-12	4.35e-10
CPED1	7q31.31	7.92	6.99	1.13305	1.32	1.39	1.98e-12	4.52e-10
TRAIP	3p21.31	6.32	6.81	0.928047	0.7	0.74	2.21e-12	4.96e-10
POLD2	7p13	10.55	10.9	0.96789	0.49	0.61	2.3e-12	4.98e-10
LRP1	12q13.3	13.29	12.51	1.06235	1.13	1.01	2.3e-12	4.98e-10
CDT1	16q24.3	7.17	7.98	0.898496	1.15	1.25	2.37e-12	5.04e-10
DHX34	19q13.32	8.77	9.13	0.96057	0.51	0.58	2.47e-12	5.17e-10
SMARCA4	19p13.2	11.48	11.77	0.975361	0.4	0.53	2.53e-12	5.22e-10
MYO19	17q12	9.08	9.5	0.955789	0.6	0.7	3.1e-12	6.26e-10
FLAD1	1q21.3	9.92	10.28	0.964981	0.5	0.62	3.14e-12	6.26e-10
CTSO	4q32.1	10.31	9.88	1.04352	0.6	0.75	3.19e-12	6.26e-10
MAP1A	15q15.3	9.45	8.75	1.08	1.01	1	3.25e-12	6.29e-10
NEGR1	1p31.1	8.13	7.11	1.14346	1.46	1.66	3.35e-12	6.39e-10
PRICKLE2	3p14.1	9.61	8.98	1.07016	0.89	1.15	3.52e-12	6.62e-10
NUAK1	12q23.3	9.52	8.89	1.07087	0.9	0.94	3.69e-12	6.84e-10
COL12A1	6q13-q14.1	13.88	12.89	1.0768	1.43	1.4	3.86e-12	7.05e-10
TEDC2	16p13.3	6.15	6.89	0.892598	1.07	1.04	3.95e-12	7.05e-10
MAOA	Xp11.3	9.13	7.57	1.20608	2.31	1.85	3.97e-12	7.05e-10
PARVA	11p15.3	11.13	10.73	1.03728	0.59	0.55	4.76e-12	8.33e-10
ZMIZ2	7p13	10.89	11.19	0.97319	0.43	0.56	4.98e-12	8.59e-10
TCF12	15q21.3	10.95	10.65	1.02817	0.41	0.58	5.35e-12	9.11e-10
PDGFC	4q32.1	9.61	8.95	1.07374	0.97	0.96	5.97e-12	1e-09
HSD17B11	4q22.1	9.02	8.37	1.07766	0.95	0.9	6.31e-12	1.05e-09
FMOD	1q32.1	11.55	10.73	1.07642	1.17	1.55	6.68e-12	1.08e-09
LPAR2	19p13.11	8.26	8.64	0.956019	0.54	0.69	6.71e-12	1.08e-09
RPUSD3	3p25.3	8.58	8.88	0.966216	0.41	0.65	6.75e-12	1.08e-09
NR2C2AP	19p13.11	8.66	9.03	0.959025	0.53	0.66	7.04e-12	1.11e-09
ZEB1	10p11.22	9.82	9.1	1.07912	1.06	1.05	7.13e-12	1.11e-09
ACO1	9p21.1	10.13	9.69	1.04541	0.66	0.65	7.71e-12	1.19e-09
BNIP3L	8p21.2	11.59	11.2	1.03482	0.56	0.69	8.13e-12	1.23e-09
FAM136A	2p13.3	9.43	9.75	0.967179	0.44	0.61	8.18e-12	1.23e-09
GBE1	3p12.2	9.38	8.94	1.04922	0.64	0.66	8.47e-12	1.26e-09
DAAM2	6p21.2	8.84	8.12	1.08867	1.06	1.05	8.68e-12	1.28e-09
RFTN2	2q33.1	6.3	5.6	1.125	1.04	0.97	9.55e-12	1.39e-09
RUSC1	1q22	10.03	10.39	0.965351	0.52	0.64	9.97e-12	1.43e-09
CAST	5q15	12.3	11.99	1.02585	0.44	0.6	1.01e-11	1.43e-09
EHD2	19q13.33	11.22	10.59	1.05949	0.94	0.92	1.02e-11	1.43e-09
GINS2	16q24.1	7.73	8.41	0.919144	1	1.08	1.06e-11	1.47e-09
LEPROT	1p31.3	9.47	8.99	1.05339	0.67	1.01	1.11e-11	1.53e-09
NID1	1q42.3	11.72	11.03	1.06256	1.02	0.94	1.13e-11	1.53e-09
EMP1	12p13.1	11.96	11.35	1.05374	0.9	0.98	1.14e-11	1.54e-09
CHAF1B	21q22.12-q22.13	7.91	8.44	0.937204	0.78	0.83	1.21e-11	1.6e-09
ARHGAP39	8q24.3	8.4	8.9	0.94382	0.74	0.8	1.21e-11	1.6e-09
E2F1	20q11.22	7.69	8.48	0.90684	1.17	1.2	1.24e-11	1.6e-09
LARP4B	10p15.3	10.53	10.78	0.976809	0.36	0.48	1.24e-11	1.6e-09
DTYMK	2q37.3	8.53	8.92	0.956278	0.57	0.65	1.3e-11	1.66e-09
RCCD1	15q26.1	7.17	7.6	0.943421	0.61	0.79	1.33e-11	1.68e-09
KIFC1	6p21.32	8.37	9.14	0.915755	1.15	1.18	1.34e-11	1.68e-09
RTKN	2p13.1	9.52	9.85	0.966497	0.46	0.65	1.46e-11	1.81e-09
MFAP3	5q33.2	10.35	10.01	1.03397	0.48	0.62	1.53e-11	1.88e-09
PPP1CA	11q13.2	11.47	11.79	0.972858	0.46	0.61	1.55e-11	1.89e-09
LDB2	4p15.32	8.27	7.67	1.07823	0.92	0.91	2.17e-11	2.62e-09
RPS6KB2	11q13.2	9.13	9.52	0.959034	0.57	0.75	2.2e-11	2.63e-09
SAPCD2	9q34.3	8.08	8.77	0.921323	1.03	1.14	2.45e-11	2.88e-09
THBS1	15q14	13.84	13.18	1.05008	1	1.09	2.46e-11	2.88e-09
LAMA4	6q21	11.38	10.71	1.06256	1.02	0.84	2.49e-11	2.88e-09
FSTL1	3q13.33	13.28	12.52	1.0607	1.17	0.97	2.5e-11	2.88e-09
ITGB5	3q21.2	12.54	12.04	1.04153	0.72	0.92	2.61e-11	2.98e-09
ITGA1	5q11.2	9.88	9.25	1.06811	0.96	0.96	2.63e-11	2.98e-09
SERINC1	6q22.31	12.69	12.36	1.0267	0.46	0.68	2.77e-11	3.11e-09
DIXDC1	11q23.1	9.57	9.11	1.05049	0.67	0.91	2.87e-11	3.18e-09
F13A1	6p25.1	10.34	9.27	1.11543	1.63	1.62	2.89e-11	3.18e-09
CHAF1A	19p13.3	8.44	8.89	0.949381	0.69	0.7	2.91e-11	3.18e-09
SAMD1	19p13.12	8.1	8.43	0.960854	0.49	0.59	3.04e-11	3.29e-09
FBRSL1	12q24.33	8.73	9.1	0.959341	0.55	0.65	3.08e-11	3.3e-09
TCF4	18q21.2	10.9	10.24	1.06445	1.01	0.93	3.12e-11	3.33e-09
EZH2	7q36.1	8.07	8.71	0.926521	0.99	0.94	3.17e-11	3.35e-09
RAB11FIP5	2p13.2	10.29	10.01	1.02797	0.42	0.54	3.33e-11	3.49e-09
CALHM5	6q22.1	7.59	6.82	1.1129	1.19	1.06	3.37e-11	3.5e-09
TWSG1	18p11.22	10.39	9.98	1.04108	0.62	0.72	3.76e-11	3.88e-09
ZEB2	2q22.3	9.7	9.05	1.07182	1.01	0.91	3.79e-11	3.88e-09
LIMA1	12q13.12	11.65	11.24	1.03648	0.58	0.87	3.86e-11	3.88e-09
PMP22	17p12	11.7	11.17	1.04745	0.77	1.05	3.86e-11	3.88e-09
DCUN1D3	16p12.3	7.74	7.42	1.04313	0.49	0.49	4.07e-11	4.07e-09
HEG1	3q21.2	11.15	10.5	1.0619	1	0.9	4.23e-11	4.19e-09
EHMT2	6p21.33	10.48	10.78	0.972171	0.45	0.52	4.27e-11	4.2e-09
RAD54L	1p34.1	6.25	7.1	0.880282	1.31	1.29	4.48e-11	4.37e-09
KDR	4q12	10.05	9.53	1.05456	0.8	0.85	4.93e-11	4.77e-09
RAB8B	15q22.2	9.54	9.12	1.04605	0.65	0.67	5.09e-11	4.89e-09
GNG12	1p31.3	11.45	10.97	1.04376	0.7	0.98	5.19e-11	4.95e-09
CDCA5	11q13.1	8.11	8.87	0.914318	1.17	1.2	5.52e-11	5.22e-09
GLI3	7p14.1	10.53	9.92	1.06149	0.89	1.29	5.58e-11	5.24e-09
ADGRL4	1p31.1	9.52	8.9	1.06966	0.98	0.89	5.72e-11	5.34e-09
MSRB3	12q14.3	9.96	9.18	1.08497	1.22	1.12	6.08e-11	5.63e-09
KCTD12	13q22.3	11.22	10.61	1.05749	0.95	0.91	6.17e-11	5.67e-09
SSC5D	19q13.42	9.35	8.45	1.10651	1.38	1.39	6.4e-11	5.84e-09
MEF2C	5q14.3	9.41	8.86	1.06208	0.86	0.82	6.68e-11	6.05e-09
DBF4	7q21.12	7.74	8.18	0.94621	0.67	0.75	6.81e-11	6.13e-09
TTBK2	15q15.2	6.96	6.41	1.0858	0.83	1.18	6.93e-11	6.19e-09
CREBRF	5q35.1	8.75	8.29	1.05549	0.69	1.01	7.08e-11	6.26e-09
DDX39A	19p13.12	9.66	10.09	0.957384	0.66	0.8	7.11e-11	6.26e-09
PSMC3IP	17q21.2	6.06	6.66	0.90991	0.93	0.93	7.15e-11	6.26e-09
ARHGEF39	9p13.3	6.4	7.03	0.910384	0.98	0.98	7.35e-11	6.39e-09
GTPBP4	10p15.3	10.13	10.44	0.970307	0.46	0.68	7.48e-11	6.46e-09
FAM69A	1p22.1	8.36	7.88	1.06091	0.74	0.81	7.61e-11	6.53e-09
PLXDC2	10p12.31	10	9.39	1.06496	0.95	1.07	7.95e-11	6.73e-09
JAM2	21q21.3	7.54	6.83	1.10395	1.11	1.13	7.96e-11	6.73e-09
POLA2	11q13.1	8.46	8.8	0.961364	0.52	0.59	8.01e-11	6.73e-09
TSHZ3	19q12	8.54	7.84	1.08929	1.1	1	8.91e-11	7.44e-09
GTPBP3	19p13.11	8.23	8.57	0.960327	0.53	0.64	8.98e-11	7.45e-09
HES6	2q37.3	6.17	6.98	0.883954	1.25	1.4	9.32e-11	7.69e-09
LAMB2	3p21.31	12.67	12.18	1.04023	0.76	0.91	9.44e-11	7.71e-09
DNMT3A	2p23.3	9.01	9.37	0.96158	0.56	0.62	9.47e-11	7.71e-09
NRN1	6p25.1	8.26	7.39	1.11773	1.38	1.16	9.75e-11	7.88e-09
ITGAV	2q32.1	12.13	11.64	1.0421	0.77	0.8	1.03e-10	8.31e-09
MARVELD1	10q24.2	10.29	9.75	1.05538	0.84	0.88	1.05e-10	8.36e-09
MYOF	10q23.33	12.45	12.03	1.03491	0.63	0.85	1.05e-10	8.36e-09
NR3C1	5q31.3	10.46	9.91	1.0555	0.87	0.86	1.07e-10	8.41e-09
DUSP6	12q21.33	10.54	9.99	1.05506	0.83	1.1	1.13e-10	8.88e-09
SLC25A22	11p15.5	8.89	9.29	0.956943	0.61	0.76	1.14e-10	8.9e-09
LOX	5q23.1	10.45	9.45	1.10582	1.61	1.21	1.15e-10	8.9e-09
GPR4	19q13.32	7.74	7.25	1.06759	0.78	0.75	1.22e-10	9.39e-09
CDCA3	12p13.31	6.93	7.69	0.90117	1.2	1.27	1.27e-10	9.69e-09
GLIS2	16p13.3	10	9.39	1.06496	0.96	0.94	1.27e-10	9.69e-09
ARHGEF40	14q11.2	9.94	9.51	1.04522	0.68	0.76	1.36e-10	1.03e-08
JAM3	11q25	9.4	8.78	1.07062	0.98	0.92	1.37e-10	1.03e-08
CAV1	7q31.2	10.97	10.18	1.0776	1.27	1.02	1.42e-10	1.06e-08
SPRY4	5q31.3	9.65	9.18	1.0512	0.75	0.8	1.47e-10	1.09e-08
OLFML1	11p15.4	8.34	7.63	1.09305	1.14	1.06	1.48e-10	1.09e-08
DACT3	19q13.32	7.08	6.38	1.10972	1.11	1.11	1.5e-10	1.1e-08
PDGFRB	5q32	12.27	11.65	1.05322	0.98	0.98	1.51e-10	1.11e-08
SUV39H1	Xp11.23	7.88	8.22	0.958637	0.54	0.57	1.59e-10	1.15e-08
SKA1	18q21.1	6.17	7.01	0.880171	1.32	1.36	1.6e-10	1.15e-08
BNC2	9p22.3-p22.2	8.46	7.6	1.11316	1.37	1.3	1.63e-10	1.17e-08
EGFLAM	5p13.2-p13.1	7.98	7.4	1.07838	0.92	0.94	1.68e-10	1.2e-08
GOLGA2P7	15q25.2	7.47	8.06	0.926799	0.94	0.98	1.76e-10	1.25e-08
JAZF1	7p15.2-p15.1	8.57	8.11	1.05672	0.73	0.69	1.77e-10	1.25e-08
CLN5	13q22.3	9.52	9.23	1.03142	0.44	0.6	1.81e-10	1.27e-08
ANTXR2	4q21.21	9.83	9.23	1.06501	0.97	0.83	1.83e-10	1.28e-08
PRR19	19q13.2	5.53	5.98	0.924749	0.72	0.76	1.85e-10	1.29e-08
TOMM40	19q13.32	9.74	10.09	0.965312	0.54	0.71	1.87e-10	1.29e-08
MYCT1	6q25.2	7.82	7.21	1.0846	0.99	0.95	1.87e-10	1.29e-08
HMGA1	6p21.31	10.39	10.87	0.955842	0.73	0.98	1.89e-10	1.29e-08
ITGB3	17q21.32	7.46	6.74	1.10682	1.12	1.33	1.99e-10	1.35e-08
PDE7B	6q23.3	6.27	5.62	1.11566	1.03	1.09	2.05e-10	1.38e-08
DSE	6q22.1	9.77	9.24	1.05736	0.85	0.76	2.11e-10	1.42e-08
ZNF25	10p11.21	8.46	8.15	1.03804	0.48	0.6	2.14e-10	1.43e-08
ENPEP	4q25	8.01	7.42	1.07951	0.94	1.03	2.2e-10	1.47e-08
RAD9A	11q13.2	7.68	8.09	0.94932	0.66	0.71	2.27e-10	1.5e-08
PASK	2q37.3	7.78	8.24	0.944175	0.75	0.67	2.3e-10	1.51e-08
DSCC1	8q24.12	6.91	7.53	0.917663	0.99	1.1	2.31e-10	1.51e-08
MARK2	11q13.1	10.5	10.79	0.973123	0.47	0.51	2.34e-10	1.51e-08
ACVR1	2q24.1	10.04	9.7	1.03505	0.54	0.57	2.36e-10	1.51e-08
AURKB	17p13.1	6.54	7.41	0.882591	1.38	1.48	2.37e-10	1.51e-08
HAUS5	19q13.12	8.11	8.46	0.958629	0.55	0.65	2.38e-10	1.51e-08
GNG11	7q21.3	9.2	8.58	1.07226	1.02	0.89	2.38e-10	1.51e-08
BLM	15q26.1	6.76	7.41	0.912281	1.04	1.12	2.38e-10	1.51e-08
WDR34	9q34.11	10.34	10.71	0.965453	0.58	0.73	2.39e-10	1.51e-08
FAT4	4q28.1	8.11	7.22	1.12327	1.43	1.33	2.4e-10	1.51e-08
ABCG2	4q22.1	6.46	5.63	1.14742	1.32	1.42	2.46e-10	1.54e-08
CLEC2B	12p13.31	8.06	7.47	1.07898	0.95	0.94	2.47e-10	1.54e-08
EPAS1	2p21	11.85	11.27	1.05146	0.95	0.82	2.59e-10	1.61e-08
DDX12P	12p13.31	5.59	6.19	0.903069	0.95	1.01	2.67e-10	1.65e-08
SPARC	5q33.1	16.08	15.31	1.05029	1.26	1.05	2.79e-10	1.71e-08
SPART	13q13.3	10.04	9.66	1.03934	0.58	0.85	2.84e-10	1.74e-08
SPATA33	16q24.3	6.9	7.25	0.951724	0.56	0.65	2.87e-10	1.75e-08
FGF7	15q21.2	7.91	6.99	1.13162	1.52	1.25	2.96e-10	1.79e-08
FRY	13q13.1	9.75	9.15	1.06557	0.94	1.18	3.1e-10	1.87e-08
TIMP3	22q12.3	14.22	13.46	1.05646	1.22	1.22	3.2e-10	1.92e-08
RBM43	2q23.3	8.27	7.88	1.04949	0.59	0.87	3.29e-10	1.96e-08
PPP2R3B	Xp22.33 and Yp11.31	6.86	7.32	0.937158	0.75	0.85	3.31e-10	1.97e-08
BANP	16q24.2	7.67	7.95	0.96478	0.45	0.52	3.36e-10	1.99e-08
KLHL3	5q31.2	7.07	6.51	1.08602	0.9	0.92	3.56e-10	2.1e-08
RASGRF2	5q14.1	7.42	6.56	1.1311	1.43	1.19	3.61e-10	2.1e-08
CHKA	11q13.2	8.98	9.39	0.956337	0.66	0.78	3.61e-10	2.1e-08
SAC3D1	11q13.1	7.39	7.85	0.941401	0.74	0.89	3.62e-10	2.1e-08
SMPD4	2q21.1	10.77	11.01	0.978202	0.37	0.45	3.77e-10	2.18e-08
CNTNAP1	17q21.2	7.66	7.11	1.07736	0.89	0.93	3.81e-10	2.19e-08
AFAP1L1	5q32	8.1	7.59	1.06719	0.84	0.79	3.83e-10	2.2e-08
ABCC9	12p12.1	8.12	7.32	1.10929	1.3	1.16	3.89e-10	2.22e-08
PDGFD	11q22.3	9.07	8.38	1.08234	1.11	1.16	3.96e-10	2.25e-08
ITGA5	12q13.13	11.47	10.95	1.04749	0.84	0.76	4.03e-10	2.26e-08
TBC1D7	6p24.1	8.03	8.4	0.955952	0.57	0.72	4.03e-10	2.26e-08
EDNRA	4q31.22-q31.23	9.62	8.96	1.07366	1.06	1.1	4.03e-10	2.26e-08
SLC25A10	17q25.3	9.56	9.97	0.958877	0.65	0.81	4.07e-10	2.27e-08
MCM2	3q21.3	9.7	10.24	0.947266	0.88	0.89	4.13e-10	2.29e-08
TLR3	4q35.1	7.54	6.9	1.09275	0.99	1.3	4.15e-10	2.29e-08
ANGPT2	8p23.1	8.46	7.85	1.07771	1.01	0.9	4.19e-10	2.31e-08
IGF2	11p15.5	11.22	10.18	1.10216	1.69	1.73	4.43e-10	2.43e-08
ITGBL1	13q33.1	10.17	9.32	1.0912	1.39	1.45	4.52e-10	2.47e-08
TEAD1	11p15.3	10.68	10.26	1.04094	0.68	0.78	4.58e-10	2.49e-08
CCNF	16p13.3	8.75	9.19	0.952122	0.71	0.77	4.6e-10	2.49e-08
TBCC	6p21.1	8.75	9.02	0.970067	0.43	0.56	4.7e-10	2.53e-08
GINM1	6q25.1	9.54	9.28	1.02802	0.4	0.54	4.74e-10	2.55e-08
WHAMMP3	15q11.2	5.86	5.35	1.09533	0.81	0.98	4.8e-10	2.57e-08
STARD13	13q13.1-q13.2	9.36	8.89	1.05287	0.75	0.91	4.83e-10	2.57e-08
POLK	5q13.3	9.02	8.7	1.03678	0.5	0.68	4.87e-10	2.58e-08
GTF3C5	9q34.13	9.87	10.12	0.975296	0.39	0.54	4.92e-10	2.6e-08
SMG5	1q22	11.11	11.41	0.973707	0.49	0.57	4.97e-10	2.61e-08
MMP2	16q12.2	13.51	12.66	1.06714	1.41	1.29	4.99e-10	2.61e-08
CCHCR1	6p21.33	8.27	8.75	0.945143	0.77	0.84	5.1e-10	2.65e-08
POLR1C	6p21.1	8.58	8.88	0.966216	0.48	0.59	5.11e-10	2.65e-08
LHFPL6	13q13.3-q14.11	9.65	9.03	1.06866	1.02	0.94	5.25e-10	2.71e-08
C14ORF132	14q32.2	9.14	8.33	1.09724	1.29	1.66	5.3e-10	2.73e-08
TSEN54	17q25.1	8.79	9.16	0.959607	0.59	0.68	5.37e-10	2.76e-08
ABHD11	7q11.23	9.44	9.92	0.951613	0.78	0.84	5.4e-10	2.76e-08
PTPRB	12q15	9.47	8.83	1.07248	1.06	1.09	5.58e-10	2.84e-08
DDX27	20q13.13	10.15	10.4	0.975962	0.4	0.53	5.59e-10	2.84e-08
FANCG	9p13.3	8.25	8.61	0.958188	0.59	0.61	5.73e-10	2.89e-08
TBX15	1p12	7.27	6.52	1.11503	1.25	1.08	5.77e-10	2.9e-08
MRPS5	2q11.1	9.24	9.48	0.974684	0.38	0.54	5.78e-10	2.9e-08
DDX28	16q22.1	7.76	8.05	0.963975	0.46	0.57	5.91e-10	2.95e-08
EIF4E3	3p13	9.78	9.4	1.04043	0.59	0.84	5.98e-10	2.97e-08
RIC1	9p24.1	9.62	9.31	1.0333	0.49	0.59	5.99e-10	2.97e-08
2017-09-10	2q13	10.35	10	1.035	0.55	0.71	6.11e-10	3.01e-08
NR2F6	19p13.11	9.93	10.28	0.965953	0.58	0.65	6.24e-10	3.05e-08
RFC4	3q27.3	8.25	8.68	0.950461	0.69	0.78	6.25e-10	3.05e-08
ANGPTL2	9q33.3	10.83	10.04	1.07869	1.32	1.05	6.26e-10	3.05e-08
UBE2S	19q13.42	7.97	8.58	0.928904	0.99	1.09	6.57e-10	3.19e-08
HNRNPL	19q13.2	12.25	12.4	0.987903	0.25	0.29	6.7e-10	3.24e-08
LRRC45	17q25.3	8.16	8.71	0.936854	0.91	0.93	6.73e-10	3.25e-08
KIF22	16p11.2	10.22	10.57	0.966887	0.58	0.63	6.83e-10	3.28e-08
HSPG2	1p36.12	13.2	12.6	1.04762	1	0.88	6.87e-10	3.29e-08
PSRC1	1p13.3	6.99	7.54	0.927056	0.91	0.9	6.94e-10	3.29e-08
PKMYT1	16p13.3	7.48	8.3	0.901205	1.36	1.3	6.94e-10	3.29e-08
HTRA1	10q26.13	12.55	11.85	1.05907	1.17	1.16	6.94e-10	3.29e-08
FKBPL	6p21.32	7.3	7.61	0.959264	0.49	0.62	7.07e-10	3.34e-08
LMCD1	3p25.3	10.22	9.68	1.05579	0.9	0.93	7.19e-10	3.37e-08
STARD8	Xq13.1	7.77	7.25	1.07172	0.87	0.82	7.2e-10	3.37e-08
RPIA	2p11.2	8.57	8.79	0.974972	0.33	0.54	7.24e-10	3.37e-08
AUNIP	1p36.11	5.5	6.14	0.895765	1.05	1.16	7.38e-10	3.43e-08
DPH2	1p34.1	8.81	9.09	0.969197	0.45	0.58	7.59e-10	3.52e-08
KANK2	19p13.2	10.7	10.28	1.04086	0.69	0.68	7.74e-10	3.57e-08
SHROOM4	Xp11.22	8.29	7.72	1.07383	0.95	0.91	8.2e-10	3.76e-08
CCDC34	11p14.1	8.02	8.4	0.954762	0.61	0.82	8.21e-10	3.76e-08
RAB31	18p11.22	12.07	11.41	1.05784	1.08	1.23	8.26e-10	3.77e-08
FBXL6	8q24.3	8.43	8.91	0.946128	0.77	0.88	8.74e-10	3.97e-08
RGCC	13q14.11	8.75	8.25	1.06061	0.83	0.85	8.77e-10	3.98e-08
C4ORF3	4q26	11.53	11.29	1.02126	0.4	0.43	8.92e-10	4.03e-08
VWA5A	11q24.2	9.6	9.02	1.0643	0.94	1.18	9.19e-10	4.13e-08
PIF1	15q22.31	4.14	4.96	0.834677	1.35	1.48	9.48e-10	4.25e-08
SYNPO	5q33.1	10.94	10.34	1.05803	1.01	0.79	9.72e-10	4.33e-08
FUT11	10q22.2	7.88	7.48	1.05348	0.66	0.71	9.73e-10	4.33e-08
LBHD1	11q12.3	9.08	9.39	0.966986	0.5	0.65	9.87e-10	4.38e-08
GINS1	20p11.21	7.73	8.38	0.922434	1.09	1	9.99e-10	4.42e-08
HAUS8	19p13.11	6.96	7.33	0.949523	0.61	0.73	1e-09	4.43e-08
COL8A1	3q12.1	9.76	8.83	1.10532	1.57	1.51	1.03e-09	4.51e-08
SSRP1	11q12.1	11.64	11.89	0.978974	0.4	0.55	1.03e-09	4.51e-08
CCDC80	3q13.2	11.99	11.11	1.07921	1.49	1.34	1.05e-09	4.56e-08
CDCA8	1p34.3	7.96	8.62	0.923434	1.09	1.16	1.06e-09	4.6e-08
ARPC5L	9q33.3	9.59	9.84	0.974593	0.42	0.54	1.1e-09	4.78e-08
RUSC2	9p13.3	9.45	9.05	1.0442	0.66	0.7	1.11e-09	4.78e-08
HNMT	2q22.1	9.96	9.53	1.04512	0.71	0.8	1.12e-09	4.83e-08
ELAVL1	19p13.2	10.87	11.03	0.985494	0.28	0.33	1.13e-09	4.85e-08
GPR34	Xp11.4	7.46	6.81	1.09545	1.08	1.14	1.16e-09	4.94e-08
VCL	10q22.2	12.1	11.72	1.03242	0.64	0.66	1.19e-09	5.08e-08
STMN1	1p36.11	11.25	11.8	0.95339	0.91	1.02	1.2e-09	5.08e-08
TROAP	12q13.12	6.87	7.7	0.892208	1.4	1.38	1.21e-09	5.1e-08
RNASEH2A	19p13.13	8.86	9.24	0.958874	0.63	0.75	1.22e-09	5.13e-08
MXD3	5q35.3	7.05	7.52	0.9375	0.77	0.85	1.22e-09	5.14e-08
MAF	16q23.2	9.59	9.07	1.05733	0.88	0.79	1.27e-09	5.3e-08
HJURP	2q37.1	7.21	7.98	0.903509	1.3	1.28	1.27e-09	5.3e-08
PCDH17	13q21.1	7.98	7.45	1.07114	0.86	1.05	1.28e-09	5.33e-08
DLL4	15q15.1	8.26	7.79	1.06033	0.8	0.83	1.29e-09	5.35e-08
BLOC1S6	15q21.1	10.38	10.16	1.02165	0.37	0.45	1.33e-09	5.48e-08
ZMYND19	9q34.3	8.24	8.59	0.959255	0.57	0.66	1.34e-09	5.51e-08
HCFC2	12q23.3	8.5	8.2	1.03659	0.51	0.59	1.34e-09	5.52e-08
CD99L2	Xq28	10.15	9.76	1.03996	0.66	0.66	1.35e-09	5.54e-08
PFDN6	6p21.32	8.75	9.12	0.95943	0.61	0.75	1.37e-09	5.58e-08
FBLN5	14q32.12	10.16	9.51	1.06835	1.07	1.2	1.39e-09	5.65e-08
SLC37A1	21q22.3	9.05	9.41	0.961743	0.6	0.68	1.39e-09	5.65e-08
VWF	12p13.31	12.07	11.42	1.05692	1.13	0.96	1.46e-09	5.92e-08
H2AFZ	4q23	11.55	11.91	0.969773	0.6	0.68	1.5e-09	6.03e-08
DPYD	1p21.3	8.96	8.42	1.06413	0.88	1.08	1.54e-09	6.18e-08
IGIP	5q31.3	8.24	7.88	1.04569	0.6	0.73	1.56e-09	6.24e-08
CDH6	5p13.3	6.35	5.72	1.11014	1.08	1.06	1.56e-09	6.24e-08
RBM14	11q13.2	9.99	10.17	0.982301	0.29	0.3	1.57e-09	6.24e-08
CRISPLD2	16q24.1	11.05	10.28	1.0749	1.33	1.17	1.59e-09	6.3e-08
KDM2B	12q24.31	9.35	9.58	0.975992	0.38	0.49	1.59e-09	6.3e-08
TIMP2	17q25.3	13.48	12.84	1.04984	1.09	0.89	1.67e-09	6.59e-08
HNRNPM	19p13.2	11.92	12.11	0.98431	0.33	0.35	1.68e-09	6.59e-08
E2F2	1p36.12	6.55	7.31	0.896033	1.28	1.26	1.71e-09	6.7e-08
CCDC3	10p13	8.72	7.96	1.09548	1.32	1.06	1.71e-09	6.7e-08
FBN1	15q21.1	12.92	12.03	1.07398	1.52	1.35	1.73e-09	6.75e-08
ORC6	16q11.2	6.06	6.85	0.884672	1.34	1.37	1.77e-09	6.87e-08
MRPS12	19q13.2	8.83	9.14	0.966083	0.5	0.74	1.78e-09	6.87e-08
DBNDD1	16q24.3	8.92	9.58	0.931106	1.13	1.01	1.78e-09	6.87e-08
GTF3C2	2p23.3	10.43	10.62	0.982109	0.3	0.41	1.78e-09	6.87e-08
HMCN1	1q25.3-q31.1	9.83	8.88	1.10698	1.63	1.59	1.8e-09	6.88e-08
MOCS1	6p21.2	8.61	8.15	1.05644	0.79	0.84	1.8e-09	6.88e-08
POC1A	3p21.2	7.35	7.82	0.939898	0.81	0.78	1.81e-09	6.91e-08
EFEMP2	11q13.1	10.13	9.57	1.05852	0.94	0.97	1.83e-09	6.95e-08
CKS1B	1q21.3	9.35	9.8	0.954082	0.74	0.85	1.86e-09	7.05e-08
PDE4A	19p13.2	9.15	8.58	1.06643	0.93	1.2	1.87e-09	7.07e-08
TSPAN18	11p11.2	9	8.41	1.07015	1	0.9	1.89e-09	7.13e-08
SAMD10	20q13.33	7.2	7.67	0.938722	0.8	0.77	1.91e-09	7.17e-08
RHOJ	14q23.2	7.54	6.95	1.08489	1.01	0.96	1.93e-09	7.22e-08
SNRPC	6p21.31	10.06	10.34	0.972921	0.46	0.59	1.93e-09	7.22e-08
FANCA	16q24.3	7.05	7.75	0.909677	1.18	1.24	1.95e-09	7.26e-08
SIRT7	17q25.3	8.09	8.45	0.957396	0.61	0.68	1.96e-09	7.26e-08
NTN4	12q22	11.2	10.32	1.08527	1.45	1.95	1.97e-09	7.3e-08
LURAP1	1p34.1	4.34	3.72	1.16667	1.03	1.16	2.03e-09	7.48e-08
OLFML3	1p13.2	10.55	9.97	1.05817	0.96	1.09	2.08e-09	7.66e-08
CHTF18	16p13.3	7.69	8.29	0.927624	1.01	1.04	2.09e-09	7.66e-08
SPARCL1	4q22.1	12.64	11.97	1.05597	1.14	1.15	2.09e-09	7.66e-08
CFH	1q31.3	10.52	9.81	1.07238	1.23	1.09	2.11e-09	7.72e-08
LRRC32	11q13.5	10.22	9.6	1.06458	1.05	1.03	2.16e-09	7.86e-08
COPS7B	2q37.1	9.17	9.4	0.975532	0.4	0.45	2.17e-09	7.87e-08
WISP1	8q24.22	8.48	7.61	1.11432	1.5	1.41	2.18e-09	7.88e-08
C11ORF84	11q13.1	8.4	8.74	0.961098	0.57	0.7	2.18e-09	7.88e-08
ESAM	11q24.2	9.49	9.01	1.05327	0.82	0.78	2.19e-09	7.89e-08
COL4A1	13q34	13.43	12.92	1.03947	0.88	0.8	2.22e-09	7.96e-08
SETD7	4q31.1	11.49	11.11	1.0342	0.63	0.73	2.23e-09	7.96e-08
ZNF3	7q22.1	9.55	9.76	0.978484	0.34	0.42	2.23e-09	7.96e-08
ITIH5	10p14	8.72	7.74	1.12661	1.68	1.5	2.24e-09	7.96e-08
DLG4	17p13.1	8.2	7.72	1.06218	0.82	0.86	2.25e-09	7.96e-08
ZNF341	20q11.22	7.23	7.46	0.969169	0.39	0.48	2.25e-09	7.96e-08
SMOC2	6q27	11.01	10.27	1.07205	1.24	1.42	2.26e-09	7.98e-08
LUM	12q21.33	14.12	13.25	1.06566	1.49	1.49	2.28e-09	8.03e-08
PAM	5q21.1	11.68	11.14	1.04847	0.92	0.96	2.3e-09	8.08e-08
FNDC3A	13q14.2	10.62	10.3	1.03107	0.53	0.73	2.31e-09	8.09e-08
POP7	7q22.1	8.77	9.09	0.964796	0.54	0.68	2.32e-09	8.1e-08
FANCC	9q22.32	7.9	8.23	0.959903	0.57	0.64	2.36e-09	8.2e-08
PLPP3	1p32.2	10.49	10.02	1.04691	0.81	0.79	2.37e-09	8.23e-08
PYGL	14q22.1	10.49	9.86	1.06389	1.07	1.28	2.4e-09	8.31e-08
AP4M1	7q22.1	8.55	8.82	0.969388	0.45	0.53	2.41e-09	8.31e-08
FERMT2	14q22.1	10.25	9.66	1.06108	1.02	0.83	2.44e-09	8.41e-08
FEZ1	11q24.2	6.93	6.28	1.1035	1.13	1.05	2.5e-09	8.58e-08
DSEL	18q22.1	8.32	7.59	1.09618	1.25	1.3	2.51e-09	8.59e-08
BCL6	3q27.3	10.34	9.94	1.04024	0.68	0.84	2.54e-09	8.67e-08
SNX2	5q23.2	10.66	10.42	1.02303	0.4	0.48	2.64e-09	8.95e-08
PCDH12	5q31.3	8.78	8.32	1.05529	0.8	0.78	2.64e-09	8.95e-08
TXNDC15	5q31.1	10.34	10.1	1.02376	0.41	0.45	2.64e-09	8.95e-08
FLI1	11q24.3	8.77	8.28	1.05918	0.85	0.86	2.65e-09	8.95e-08
ESRP2	16q22.1	9.86	10.22	0.964775	0.62	0.65	2.66e-09	8.95e-08
RASGRP4	19q13.2	5.16	4.56	1.13158	1.04	1.04	2.7e-09	9.09e-08
RECK	9p13.3	8.54	7.83	1.09068	1.25	1.04	2.72e-09	9.13e-08
NOC2L	1p36.33	10.57	10.93	0.967063	0.62	0.64	2.74e-09	9.15e-08
MIS18A	21q22.11	7.93	8.29	0.956574	0.63	0.65	2.82e-09	9.4e-08
ASPN	9q22.31	11.24	10.09	1.11397	2.01	1.89	2.85e-09	9.49e-08
ARSJ	4q26	6.89	6.18	1.11489	1.2	1.34	2.94e-09	9.75e-08
ZNF175	19q13.41	7.46	7.02	1.06268	0.72	1.02	2.98e-09	9.86e-08
CDC20	1p34.2	8.35	9.13	0.914567	1.35	1.41	3e-09	9.92e-08
HEXB	5q13.3	11.41	11.16	1.0224	0.44	0.5	3.1e-09	1.02e-07
GEMIN7	19q13.32	8.07	8.3	0.972289	0.39	0.53	3.13e-09	1.03e-07
IMPDH1	7q32.1	10.22	10.57	0.966887	0.59	0.73	3.19e-09	1.04e-07
DNMT3B	20q11.21	6.47	7.06	0.916431	1	1.18	3.19e-09	1.04e-07
MARCKSL1	1p35.1	12.41	12.82	0.968019	0.72	0.69	3.2e-09	1.04e-07
SNRPD1	18q11.2	9.53	9.81	0.971458	0.48	0.6	3.22e-09	1.05e-07
DNAJC9	10q22.2	9.47	9.78	0.968303	0.53	0.58	3.29e-09	1.07e-07
SFRP4	7p14.1	11.27	10.21	1.10382	1.83	1.84	3.29e-09	1.07e-07
THBD	20p11.21	9.45	8.85	1.0678	1.05	1.03	3.32e-09	1.07e-07
FANCI	15q26.1	9.4	9.91	0.948537	0.88	0.86	3.36e-09	1.08e-07
SLC52A2	8q24.3	10.07	10.49	0.959962	0.72	0.86	3.43e-09	1.1e-07
CD302	2q24.2	9.81	9.36	1.04808	0.77	0.91	3.54e-09	1.13e-07
NID2	14q22.1	10.28	9.59	1.07195	1.21	1.04	3.61e-09	1.15e-07
KIF18B	17q21.31	6.66	7.42	0.897574	1.31	1.39	3.63e-09	1.15e-07
NOP56	20p13	10.86	11.13	0.975741	0.45	0.55	3.63e-09	1.15e-07
XRCC3	14q32.33	7.51	7.9	0.950633	0.67	0.72	3.66e-09	1.16e-07
ESPL1	12q13.13	7.46	8.19	0.910867	1.29	1.23	3.72e-09	1.18e-07
SNX9	6q25.3	11.11	10.87	1.02208	0.4	0.53	3.76e-09	1.19e-07
C21ORF58	21q22.3	6.35	6.89	0.921626	0.94	0.97	3.77e-09	1.19e-07
DDX56	7p13	10.39	10.59	0.981114	0.33	0.44	3.81e-09	1.2e-07
COL3A1	2q32.2	16.7	15.8	1.05696	1.59	1.44	3.86e-09	1.21e-07
LAMA2	6q22.33	9.61	8.73	1.1008	1.52	1.65	3.86e-09	1.21e-07
FRMD6	14q22.1	10.89	10.38	1.04913	0.87	1.02	3.91e-09	1.21e-07
STX12	1p35.3	10.41	10.22	1.01859	0.33	0.41	3.91e-09	1.21e-07
SNX29	16p13.13-p13.12	9.56	9.27	1.03128	0.49	0.59	3.95e-09	1.23e-07
SYNE1	6q25.2	10.07	9.56	1.05335	0.88	0.98	4.02e-09	1.24e-07
MCM3	6p12.2	11.01	11.34	0.970899	0.56	0.64	4.03e-09	1.24e-07
NUP85	17q25.1	9.37	9.65	0.970984	0.48	0.59	4.04e-09	1.24e-07
MAN1A1	6q22.31	10.52	9.86	1.06694	1.13	1.36	4.06e-09	1.25e-07
C17ORF53	17q21.31	6.03	6.48	0.930556	0.77	0.89	4.07e-09	1.25e-07
SEC23A	14q21.1	10.54	10.07	1.04667	0.82	0.69	4.09e-09	1.25e-07
NAP1L3	Xq21.32	6.42	5.71	1.12434	1.26	1.17	4.13e-09	1.26e-07
FBLN1	22q13.31	12.35	11.63	1.06191	1.26	1.19	4.17e-09	1.27e-07
EBF1	5q33.3	7.93	7.2	1.10139	1.3	1.06	4.21e-09	1.28e-07
SAMD4A	14q22.2	8.4	7.86	1.0687	0.94	0.98	4.3e-09	1.3e-07
LOC642846	12p13.31	6.36	6.88	0.924419	0.89	0.98	4.32e-09	1.3e-07
C6ORF136	6p21.33	7.68	7.96	0.964824	0.48	0.57	4.32e-09	1.3e-07
RCC1	1p35.3	9.4	9.83	0.956256	0.75	0.81	4.57e-09	1.38e-07
ASF1B	19p13.12	8.34	8.95	0.931844	1.07	1	4.59e-09	1.38e-07
PTPRE	10q26.2	9.02	8.61	1.04762	0.72	0.8	4.61e-09	1.38e-07
MXRA7	17q25.1	11.07	10.59	1.04533	0.85	0.83	4.62e-09	1.38e-07
PXK	3p14.3	7.98	7.64	1.0445	0.57	0.83	4.63e-09	1.38e-07
NOP58	2q33.1	10.37	10.62	0.97646	0.43	0.53	4.74e-09	1.41e-07
IMMP1L	11p13	6.19	6.48	0.955247	0.5	0.6	4.97e-09	1.47e-07
KCNJ2	17q24.3	7.04	6.48	1.08642	0.97	1.06	5.02e-09	1.48e-07
TRIM23	5q12.3	8.56	8.26	1.03632	0.51	0.68	5.03e-09	1.49e-07
PRKCZ	1p36.33	8.32	8.77	0.948689	0.81	0.69	5.13e-09	1.51e-07
DLC1	8p22	9.97	9.37	1.06403	1.06	1	5.23e-09	1.54e-07
CDH5	16q21	10.11	9.56	1.05753	0.98	0.87	5.25e-09	1.54e-07
MTFR2	6q23.3	5.21	5.95	0.87563	1.32	1.28	5.27e-09	1.54e-07
LIG1	19q13.33	9.29	9.67	0.960703	0.66	0.6	5.35e-09	1.56e-07
PUS1	12q24.33	7.95	8.32	0.955529	0.64	0.75	5.46e-09	1.59e-07
GTF2H4	6p21.33	8.5	8.74	0.97254	0.43	0.5	5.67e-09	1.65e-07
SLC35G2	3q22.3	5.99	5.42	1.10517	1.02	0.91	5.69e-09	1.65e-07
PCDH18	4q28.3	9.11	8.43	1.08066	1.21	1.12	5.71e-09	1.65e-07
TACC3	4p16.3	9.11	9.64	0.945021	0.93	0.95	5.72e-09	1.65e-07
ACKR3	2q37.3	9.4	8.78	1.07062	1.09	1.09	5.81e-09	1.67e-07
ADAM10	15q21.3	10.82	10.45	1.03541	0.62	0.85	5.93e-09	1.7e-07
ZWINT	10q21.1	8.99	9.52	0.944328	0.93	0.94	5.98e-09	1.71e-07
WDR74	11q12.3	8.79	9.12	0.963816	0.58	0.73	6.01e-09	1.72e-07
CREBL2	12p13.1	10.83	10.51	1.03045	0.55	0.6	6.04e-09	1.72e-07
CEP89	19q13.11	8.91	9.12	0.976974	0.35	0.5	6.05e-09	1.72e-07
MORC2	22q12.2	9.99	10.21	0.978452	0.36	0.49	6.06e-09	1.72e-07
NUF2	1q23.3	7.31	8.07	0.905824	1.34	1.34	6.24e-09	1.77e-07
EME1	17q21.33	5.6	6.28	0.89172	1.18	1.19	6.25e-09	1.77e-07
PTMA	2q37.1	13.84	14.1	0.98156	0.45	0.56	6.28e-09	1.77e-07
MVK	12q24.11	8.19	8.52	0.961268	0.57	0.68	6.36e-09	1.79e-07
VAMP3	1p36.23	11.05	10.85	1.01843	0.35	0.4	6.43e-09	1.8e-07
LSR	19q13.12	10.92	11.35	0.962115	0.75	0.78	6.43e-09	1.8e-07
RAD54B	8q22.1	6.85	7.44	0.920699	1.03	1	6.46e-09	1.81e-07
NOP2	12p13.31	9.48	9.8	0.967347	0.54	0.73	6.7e-09	1.87e-07
PSMD3	17q21.1	11.33	11.71	0.967549	0.63	1.01	6.72e-09	1.87e-07
AMOTL2	3q22.2	10.61	10.21	1.03918	0.7	0.82	6.78e-09	1.88e-07
SLC2A3	12p13.31	9.65	8.95	1.07821	1.27	0.99	6.78e-09	1.88e-07
MINDY2	15q21.3-q22.1	8.1	7.57	1.07001	0.89	1.18	6.85e-09	1.89e-07
OTUD1	10p12.2	8.66	8.4	1.03095	0.46	0.57	6.98e-09	1.93e-07
BEND3	6q21	6.96	7.44	0.935484	0.84	0.95	7.19e-09	1.98e-07
ANKRD13D	11q13.2	8.95	9.35	0.957219	0.7	0.74	7.2e-09	1.98e-07
CENPX	17q25.3	8.84	9.27	0.953614	0.76	0.88	7.21e-09	1.98e-07
CXORF36	Xp11.3	8.92	8.35	1.06826	1.04	0.9	7.3e-09	2e-07
KMT5C	19q13.42	7.18	7.58	0.94723	0.71	0.81	7.38e-09	2.02e-07
MRTO4	1p36.13	9.54	9.82	0.971487	0.49	0.56	7.43e-09	2.03e-07
WDR62	19q13.12	6.99	7.63	0.916121	1.13	1.11	7.67e-09	2.09e-07
PGAM5	12q24.33	8.63	8.92	0.967489	0.5	0.59	7.84e-09	2.13e-07
COPZ2	17q21.32	8.24	7.55	1.09139	1.25	1.14	7.89e-09	2.13e-07
CDC25A	3p21.31	6.25	7	0.892857	1.34	1.3	7.9e-09	2.13e-07
VSTM4	10q11.23	8.77	8.11	1.08138	1.18	1.15	7.91e-09	2.13e-07
CDH11	16q21	11.58	10.79	1.07322	1.42	1.25	8e-09	2.15e-07
LRWD1	7q22.1	8.05	8.4	0.958333	0.61	0.66	8.08e-09	2.17e-07
LCA5	6q14.1	7.52	7.07	1.06365	0.77	0.97	8.36e-09	2.24e-07
ITPRIPL2	16p12.3	11.39	10.93	1.04209	0.81	0.99	8.44e-09	2.26e-07
DUS1L	17q25.3	10.24	10.63	0.963311	0.67	0.77	8.73e-09	2.33e-07
COL6A3	2q37.3	14.85	14.08	1.05469	1.4	1.28	8.83e-09	2.35e-07
CALCRL	2q32.1	9.45	8.87	1.06539	1.03	1.05	8.83e-09	2.35e-07
CPSF1	8q24.3	10.39	10.76	0.965613	0.66	0.74	8.89e-09	2.35e-07
PLK1	16p12.2	8.17	8.91	0.916947	1.33	1.31	8.89e-09	2.35e-07
BYSL	6p21.1	8.73	9.05	0.964641	0.54	0.71	9.02e-09	2.38e-07
UBE2T	1q32.1	7.97	8.61	0.925668	1.16	1.12	9.08e-09	2.39e-07
CTDSP2	12q14.1	12.41	12.18	1.01888	0.41	0.52	9.38e-09	2.47e-07
ADCK5	8q24.3	6.74	7.3	0.923288	0.99	0.99	9.5e-09	2.49e-07
SNTB2	16q22.1	9.72	9.38	1.03625	0.6	0.62	9.52e-09	2.49e-07
ERG	21q22.2	8.5	7.93	1.07188	1.04	0.92	9.65e-09	2.52e-07
RALY	20q11.22	11.25	11.5	0.978261	0.44	0.56	9.71e-09	2.53e-07
SCRIB	8q24.3	10.28	10.75	0.956279	0.85	0.87	9.87e-09	2.57e-07
FBXL3	13q22.3	10.51	10.18	1.03242	0.58	0.71	9.95e-09	2.58e-07
ZFPM2	8q23.1	7.25	6.46	1.12229	1.43	1.25	1.01e-08	2.63e-07
YIPF5	5q31.3	10.37	10.14	1.02268	0.4	0.44	1.02e-08	2.64e-07
AAED1	9q22.33	7.34	6.99	1.05007	0.63	0.68	1.03e-08	2.65e-07
ILKAP	2q37.3	8.49	8.7	0.975862	0.37	0.43	1.05e-08	2.7e-07
TNS2	12q13.13	10.71	10.27	1.04284	0.77	0.85	1.07e-08	2.75e-07
MYBL2	20q13.12	8.52	9.48	0.898734	1.72	1.73	1.07e-08	2.75e-07
EIF3B	7p22.3	11.84	12.1	0.978512	0.45	0.54	1.08e-08	2.77e-07
ECE2	3q27.1	7.28	7.74	0.940568	0.8	1.01	1.08e-08	2.77e-07
GRK6	5q35.3	9.27	9.55	0.970681	0.51	0.59	1.09e-08	2.77e-07
PTGS1	9q33.2	9.01	8.46	1.06501	1	0.95	1.09e-08	2.78e-07
MELK	9p13.2	7.45	8.26	0.901937	1.47	1.39	1.1e-08	2.8e-07
EBNA1BP2	1p34.2	10.12	10.37	0.975892	0.46	0.51	1.11e-08	2.81e-07
NASP	1p34.1	10.61	10.92	0.971612	0.54	0.67	1.12e-08	2.83e-07
FOXO1	13q14.11	9.42	8.91	1.05724	0.94	0.86	1.12e-08	2.84e-07
TRIM6	11p15.4	7.39	6.84	1.08041	0.96	1.23	1.14e-08	2.87e-07
BACE1	11q23.3	10.09	9.7	1.04021	0.71	0.64	1.17e-08	2.93e-07
PTBP1	19p13.3	12.27	12.43	0.987128	0.28	0.3	1.17e-08	2.93e-07
RBM4	11q13.2	11.1	11.29	0.983171	0.33	0.43	1.17e-08	2.93e-07
ALYREF	17q25.3	9.55	9.93	0.961732	0.67	0.83	1.18e-08	2.94e-07
RCBTB2	13q14.2	8.22	7.82	1.05115	0.72	0.7	1.19e-08	2.97e-07
C14ORF37	14q23.1	6.92	6.19	1.11793	1.35	1.19	1.19e-08	2.97e-07
PCNA	20p12.3	10.9	11.26	0.968028	0.64	0.68	1.2e-08	2.98e-07
LLGL2	17q25.1	10.09	10.59	0.952786	0.9	0.78	1.21e-08	3e-07
DCHS1	11p15.4	10.07	9.55	1.05445	0.92	0.94	1.21e-08	3e-07
CTU1	19q13.41	5.01	5.42	0.924354	0.74	0.89	1.22e-08	3.03e-07
DHTKD1	10p14	10.22	10.58	0.965974	0.63	0.74	1.23e-08	3.03e-07
PALM2-AKAP2	9q31.3	10.08	9.57	1.05329	0.94	0.81	1.24e-08	3.05e-07
KLF9	9q21.12	10.15	9.72	1.04424	0.78	0.86	1.26e-08	3.09e-07
KLHL5	4p14	9.87	9.43	1.04666	0.78	0.87	1.26e-08	3.09e-07
SLC8A1	2p22.1	7.87	7.39	1.06495	0.86	0.98	1.26e-08	3.09e-07
HEYL	1p34.2	8.83	8.33	1.06002	0.88	0.95	1.27e-08	3.1e-07
SERPINF1	17p13.3	12.05	11.35	1.06167	1.28	1.17	1.3e-08	3.17e-07
MITF	3p13	8.47	7.85	1.07898	1.15	0.95	1.31e-08	3.2e-07
STIP1	11q13.1	11.58	11.87	0.975569	0.51	0.62	1.35e-08	3.27e-07
KIF2C	1p34.1	8.05	8.77	0.917902	1.29	1.33	1.35e-08	3.27e-07
MRPL12	17q25.3	9.44	9.88	0.955466	0.79	0.91	1.35e-08	3.27e-07
GNG2	14q22.1	8.77	8.2	1.06951	1.05	0.89	1.36e-08	3.28e-07
MGAT4B	5q35.3	10.56	10.79	0.978684	0.4	0.53	1.38e-08	3.34e-07
MEX3A	1q22	8.65	9.41	0.919235	1.37	1.54	1.4e-08	3.36e-07
AFG3L1P	16q24.3	7.42	7.74	0.958656	0.59	0.68	1.42e-08	3.4e-07
PFKFB3	10p15.1	11.38	10.83	1.05078	0.98	1.08	1.46e-08	3.51e-07
PWP2	21q22.3	9.33	9.61	0.970864	0.51	0.59	1.51e-08	3.62e-07
PLPP7	9q34.13	5.54	4.89	1.13292	1.21	1.12	1.53e-08	3.65e-07
PUSL1	1p36.33	7.41	7.78	0.952442	0.66	0.82	1.53e-08	3.65e-07
PCDH7	4p15.1	9.01	8.21	1.09744	1.46	1.39	1.53e-08	3.65e-07
INCENP	11q12.3	8.35	8.71	0.958668	0.64	0.79	1.54e-08	3.67e-07
H2AFX	11q23.3	9.07	9.52	0.952731	0.8	0.92	1.55e-08	3.67e-07
PPP2R5D	6p21.1	10.22	10.43	0.979866	0.36	0.47	1.56e-08	3.69e-07
SKA3	13q12.11	6.72	7.4	0.908108	1.23	1.23	1.58e-08	3.72e-07
MMRN2	10q23.2	9.69	9.13	1.06134	1.05	0.93	1.59e-08	3.75e-07
ARID5B	10q21.2	10.76	10.32	1.04264	0.77	0.89	1.6e-08	3.77e-07
RIN2	20p11.23	10.99	10.59	1.03777	0.72	0.81	1.64e-08	3.84e-07
CHSY3	5q23.3	7.01	6.35	1.10394	1.24	1.04	1.66e-08	3.89e-07
PLA2R1	2q24.2	8.31	7.8	1.06538	0.93	0.99	1.67e-08	3.9e-07
HTR2B	2q37.1	5.55	4.79	1.15866	1.38	1.44	1.68e-08	3.93e-07
FAM83H	8q24.3	11	11.46	0.95986	0.85	0.78	1.69e-08	3.94e-07
FIBIN	11p14.2	9.17	8.28	1.10749	1.63	1.45	1.74e-08	4.05e-07
RCC2	1p36.13	11.97	12.23	0.978741	0.46	0.55	1.78e-08	4.14e-07
TARDBP	1p36.22	11.71	11.82	0.990694	0.19	0.21	1.81e-08	4.19e-07
LRCH2	Xq23	5.47	4.72	1.1589	1.4	1.22	1.81e-08	4.2e-07
PPM1G	2p23.3	11.26	11.49	0.979983	0.41	0.52	1.84e-08	4.26e-07
LTBP2	14q24.3	12.05	11.46	1.05148	1.09	1.13	1.86e-08	4.29e-07
ATP8B4	15q21.2	6.39	5.83	1.09605	1.02	1.06	1.94e-08	4.46e-07
PRSS23	11q14.2	12.38	11.68	1.05993	1.27	1.34	1.94e-08	4.46e-07
C1ORF159	1p36.33	7.05	7.47	0.943775	0.76	0.85	1.95e-08	4.47e-07
2017-09-11	4q21.1	11.57	11.12	1.04047	0.82	0.72	1.99e-08	4.55e-07
IGF1	12q23.2	8.86	7.86	1.12723	1.85	1.8	2.01e-08	4.6e-07
GALNT10	5q33.2	11.07	10.56	1.0483	0.91	1.13	2.02e-08	4.6e-07
DPP3	11q13.2	10.02	10.35	0.968116	0.58	0.67	2.04e-08	4.64e-07
CLEC14A	14q21.1	8.85	8.33	1.06242	0.97	0.91	2.11e-08	4.79e-07
TCEAL7	Xq22.2	5.09	4.41	1.1542	1.25	1.28	2.11e-08	4.79e-07
ZNF423	16q12.1	7.66	6.99	1.09585	1.2	1.34	2.12e-08	4.79e-07
CENPM	22q13.2	6.51	7.13	0.913043	1.14	1.09	2.12e-08	4.8e-07
IQGAP3	1q22	8.52	9.21	0.925081	1.26	1.29	2.13e-08	4.81e-07
ROBO4	11q24.2	8.87	8.36	1.061	0.95	0.83	2.16e-08	4.87e-07
COL4A3BP	5q13.3	10.04	9.74	1.0308	0.54	0.67	2.17e-08	4.88e-07
RFLNB	17p13.3	9.08	8.53	1.06448	1.04	0.89	2.18e-08	4.9e-07
SNRPA	19q13.2	9.94	10.2	0.97451	0.47	0.57	2.18e-08	4.9e-07
CKS2	9q22.2	8.76	9.24	0.948052	0.89	0.95	2.2e-08	4.93e-07
PRCC	1q23.1	10.71	10.94	0.978976	0.42	0.47	2.21e-08	4.94e-07
ANTXR1	2p13.3	12.52	11.81	1.06012	1.34	1.12	2.22e-08	4.95e-07
RAD51	15q15.1	6.74	7.37	0.914518	1.16	1.08	2.29e-08	5.09e-07
DSN1	20q11.23	8.71	9.09	0.958196	0.7	0.66	2.3e-08	5.11e-07
TMPO-AS1	12q23.1	5.65	6.1	0.92623	0.84	0.83	2.33e-08	5.17e-07
KDELC2	11q22.3	10.05	9.61	1.04579	0.82	0.71	2.36e-08	5.23e-07
RB1	13q14.2	10.3	9.97	1.0331	0.57	0.86	2.36e-08	5.23e-07
GJA1	6q22.31	12.24	11.43	1.07087	1.48	1.67	2.4e-08	5.31e-07
HSPA12A	10q25.3	8.17	7.69	1.06242	0.85	1.03	2.41e-08	5.32e-07
ARMC6	19p13.11	9.09	9.37	0.970117	0.51	0.59	2.42e-08	5.32e-07
TIGD3	11q13.1	3.5	4.06	0.862069	1.03	1.13	2.44e-08	5.35e-07
PPP5C	19q13.32	9.92	10.13	0.979269	0.37	0.42	2.44e-08	5.35e-07
CD34	1q32.2	10.55	10.05	1.04975	0.93	0.82	2.46e-08	5.37e-07
UCKL1	20q13.33	8.78	9.1	0.964835	0.59	0.65	2.48e-08	5.4e-07
APCDD1	18p11.22	8.73	8.14	1.07248	1.07	1.23	2.48e-08	5.4e-07
ENG	9q34.11	11.57	11.16	1.03674	0.75	0.7	2.48e-08	5.4e-07
FHL1	Xq26.3	9.79	8.83	1.10872	1.83	1.31	2.5e-08	5.42e-07
CDC123	10p14-p13	10.05	10.27	0.978578	0.39	0.62	2.52e-08	5.46e-07
PIMREG	17p13.2	5.92	6.65	0.890226	1.35	1.38	2.53e-08	5.47e-07
TGFB3	14q24.3	10.68	10.17	1.05015	0.91	1.14	2.53e-08	5.47e-07
CACNB3	12q13.12	9.18	9.58	0.958246	0.73	0.82	2.54e-08	5.47e-07
RGS5	1q23.3	11.69	10.97	1.06563	1.34	1.34	2.55e-08	5.5e-07
CCNI	4q21.1	12.58	12.32	1.0211	0.44	0.71	2.56e-08	5.51e-07
TMEM183A	1q32.1	10.36	10.61	0.976437	0.45	0.49	2.57e-08	5.51e-07
MAZ	16p11.2	12.05	12.34	0.976499	0.52	0.57	2.58e-08	5.52e-07
UBL4A	Xq28	9.96	10.17	0.979351	0.38	0.49	2.61e-08	5.58e-07
EXOSC2	9q34.12	8.62	8.83	0.976217	0.37	0.46	2.61e-08	5.58e-07
BMPR2	2q33.1-q33.2	11.61	11.3	1.02743	0.56	0.64	2.66e-08	5.68e-07
PYCR1	17q25.3	10.74	11.16	0.962366	0.78	0.85	2.78e-08	5.93e-07
MEIS3P1	17p12	8.96	8.56	1.04673	0.71	0.9	2.8e-08	5.96e-07
SLC25A46	5q22.1	9.26	8.99	1.03003	0.48	0.62	2.87e-08	6.1e-07
FKBP9P1	7p11.2	6.1	5.64	1.08156	0.87	0.86	2.88e-08	6.11e-07
MTA2	11q12.3	10.84	11.06	0.980108	0.4	0.48	2.89e-08	6.12e-07
TGFBI	5q31.1	11.95	11.28	1.0594	1.27	1.02	2.91e-08	6.14e-07
CLIC4	1p36.11	12.47	12.08	1.03228	0.74	0.72	2.93e-08	6.18e-07
MN1	22q12.1	8.13	7.45	1.09128	1.25	1.31	2.97e-08	6.26e-07
ST6GALNAC6	9q34.11	10.12	9.8	1.03265	0.59	0.61	2.98e-08	6.26e-07
MEDAG	13q12.3	7.42	6.63	1.11916	1.49	1.33	3.04e-08	6.38e-07
COLEC12	18p11.32	9.54	8.79	1.08532	1.38	1.48	3.07e-08	6.43e-07
ACTR3B	7q36.1-q36.2	7.41	7.81	0.948784	0.71	0.93	3.08e-08	6.44e-07
CSTF3	11p13	9.38	9.59	0.978102	0.39	0.43	3.11e-08	6.5e-07
THBS2	6q27	13.07	12.24	1.06781	1.55	1.38	3.12e-08	6.5e-07
DNA2	10q21.3	6.76	7.28	0.928571	0.97	0.96	3.13e-08	6.51e-07
POLR2H	3q27.1	9.57	9.85	0.971574	0.51	0.58	3.14e-08	6.53e-07
AKAP12	6q25.1	9.64	8.87	1.08681	1.45	1.28	3.15e-08	6.54e-07
ID3	1p36.12	9.59	9.09	1.05501	0.95	0.92	3.18e-08	6.58e-07
KIF15	3p21.31	6.83	7.56	0.903439	1.38	1.27	3.19e-08	6.59e-07
FAM111B	11q12.1	7.93	8.66	0.915704	1.38	1.28	3.21e-08	6.62e-07
COL5A2	2q32.2	13.61	12.81	1.06245	1.52	1.29	3.22e-08	6.64e-07
CENPN	16q23.2	7.74	8.26	0.937046	0.95	0.97	3.3e-08	6.77e-07
MRVI1	11p15.4	8.76	8.17	1.07222	1.12	1	3.31e-08	6.77e-07
NT5E	6q14.3	8.83	8.18	1.07946	1.23	1.09	3.31e-08	6.77e-07
LAYN	11q23.1	7.31	6.73	1.08618	1.1	0.95	3.31e-08	6.77e-07
DOCK4	7q31.1	8.8	8.36	1.05263	0.8	0.9	3.31e-08	6.77e-07
SRSF2	17q25.1	11.54	11.72	0.984642	0.34	0.36	3.32e-08	6.77e-07
ARPC1A	7q22.1	11.11	11.31	0.982317	0.36	0.49	3.32e-08	6.77e-07
RCAN2	6p12.3	8.2	7.7	1.06494	0.95	0.87	3.35e-08	6.81e-07
IFITM2	11p15.5	11.61	11.13	1.04313	0.89	1.07	3.36e-08	6.83e-07
ARHGAP24	4q21.23-q21.3	7.82	7.33	1.06685	0.92	0.87	3.38e-08	6.85e-07
BIRC5	17q25.3	7.58	8.35	0.907784	1.43	1.5	3.39e-08	6.87e-07
TCF19	6p21.33	8.72	9.19	0.948857	0.87	0.89	3.48e-08	7.05e-07
PPP1R3C	10q23.32	8.71	7.81	1.11524	1.64	2.05	3.51e-08	7.09e-07
MAN2A1	5q21.3	9.66	9.08	1.06388	1.05	1.27	3.52e-08	7.09e-07
TTLL4	2q35	8.67	9.05	0.958011	0.67	0.99	3.53e-08	7.1e-07
CCNE1	19q12	5.62	6.41	0.876755	1.46	1.66	3.59e-08	7.21e-07
FOXM1	12p13.33	9	9.71	0.92688	1.32	1.39	3.62e-08	7.27e-07
NSUN5P1	7q11.23	5.78	6.37	0.907378	1.12	1.12	3.69e-08	7.39e-07
TMEM43	3p25.1	11.31	11.07	1.02168	0.43	0.48	3.7e-08	7.39e-07
TK1	17q25.3	9.45	10.02	0.943114	1.06	1.1	3.82e-08	7.62e-07
PTCD1	7q22.1	8.4	8.68	0.967742	0.53	0.52	3.82e-08	7.62e-07
RRP36	6p21.1	9.41	9.63	0.977155	0.4	0.52	3.9e-08	7.76e-07
TRIP13	5p15.33	7.74	8.39	0.922527	1.23	1.18	3.93e-08	7.81e-07
LPAR6	13q14.2	9.42	9.04	1.04204	0.72	0.79	3.95e-08	7.83e-07
OIP5	15q15.1	5.61	6.19	0.9063	1.09	1.08	4.03e-08	7.99e-07
XRCC2	7q36.1	5.65	6.2	0.91129	1.03	1.11	4.1e-08	8.1e-07
TIMM29	19p13.2	7.78	7.97	0.976161	0.35	0.49	4.1e-08	8.1e-07
ILF3	19p13.2	12.26	12.43	0.986323	0.31	0.38	4.18e-08	8.24e-07
ADGRA2	8p11.23	10.12	9.59	1.05527	1.01	0.9	4.18e-08	8.24e-07
FAM72B	1p11.2	6.15	6.8	0.904412	1.22	1.32	4.2e-08	8.26e-07
SLC16A4	1p13.3	7.76	7.13	1.08836	1.17	1.36	4.28e-08	8.41e-07
DHX37	12q24.31	8.81	9.06	0.972406	0.46	0.54	4.34e-08	8.51e-07
MAP3K5	6q23.3	8.94	8.48	1.05425	0.85	0.94	4.35e-08	8.51e-07
TICRR	15q26.1	6.45	7.13	0.904628	1.27	1.35	4.35e-08	8.51e-07
PKD2	4q22.1	9.36	8.85	1.05763	0.97	0.81	4.37e-08	8.51e-07
FILIP1L	3q12.1	9.96	9.32	1.06867	1.24	1.05	4.37e-08	8.51e-07
FPR1	19q13.41	6.91	6.31	1.09509	1.11	1.26	4.44e-08	8.64e-07
C1QTNF6	22q12.3	10.08	9.49	1.06217	1.11	0.99	4.45e-08	8.64e-07
LSM4	19p13.11	10.53	10.82	0.973198	0.51	0.68	4.52e-08	8.77e-07
SETD6	16q21	7.86	8.15	0.964417	0.53	0.59	4.59e-08	8.89e-07
CDC42BPG	11q13.1	8.37	8.88	0.942568	0.98	0.83	4.64e-08	8.96e-07
PEAR1	1q23.1	7.23	6.63	1.0905	1.13	1.08	4.65e-08	8.97e-07
PLCXD1	Xp22.33 and Yp11.32-p11.31	7.73	8.15	0.948466	0.78	0.9	4.66e-08	8.97e-07
CENPA	2p23.3	6	6.77	0.886263	1.46	1.45	4.74e-08	9.12e-07
TMEM47	Xp21.1	9.33	8.64	1.07986	1.32	1.21	4.76e-08	9.14e-07
FILIP1	6q14.1	6.47	5.88	1.10034	1.11	1.06	4.77e-08	9.14e-07
CXCL12	10q11.21	11.49	10.77	1.06685	1.37	1.19	4.79e-08	9.17e-07
PCDH19	Xq22.1	6.9	5.97	1.15578	1.73	1.88	4.81e-08	9.2e-07
TLR4	9q33.1	8.88	8.35	1.06347	1	0.97	4.9e-08	9.36e-07
ATXN7L2	1p13.3	5.91	6.31	0.936609	0.75	0.84	4.91e-08	9.36e-07
NCAPH	2q11.2	7.5	8.1	0.925926	1.14	1.19	4.91e-08	9.36e-07
CHMP1A	16q24.3	10.65	10.91	0.976169	0.49	0.6	4.94e-08	9.39e-07
FOXN3	14q31.3-q32.11	10.44	10.03	1.04088	0.79	0.71	4.95e-08	9.4e-07
CCNB2	15q22.2	7.98	8.63	0.924681	1.22	1.25	4.96e-08	9.4e-07
PID1	2q36.3	6.79	6.02	1.12791	1.46	1.36	4.96e-08	9.4e-07
POLD1	19q13.33	8.43	8.83	0.9547	0.76	0.77	5.06e-08	9.57e-07
LMO2	11p13	8.23	7.8	1.05513	0.81	0.78	5.07e-08	9.58e-07
STIL	1p33	7.74	8.27	0.935913	0.98	1.04	5.12e-08	9.63e-07
HMGB2	4q34.1	10.8	11.25	0.96	0.85	0.86	5.12e-08	9.63e-07
GET4	7p22.3	9.23	9.54	0.967505	0.58	0.68	5.15e-08	9.68e-07
ZNF786	7q36.1	7.51	7.79	0.964056	0.54	0.5	5.17e-08	9.7e-07
TK2	16q21	9.68	9.4	1.02979	0.52	0.53	5.21e-08	9.75e-07
GJA5	1q21.2	8.94	8.36	1.06938	1.12	1.05	5.21e-08	9.75e-07
CSGALNACT2	10q11.21	9.67	9.36	1.03312	0.58	0.57	5.23e-08	9.76e-07
QKI	6q26	10.84	10.46	1.03633	0.73	0.75	5.25e-08	9.78e-07
CPSF4	7q22.1	8.46	8.72	0.970183	0.49	0.55	5.25e-08	9.78e-07
CNN3	1p21.3	12.22	11.77	1.03823	0.86	0.89	5.27e-08	9.79e-07
EBF3	10q26.3	6.31	5.55	1.13694	1.47	1.25	5.3e-08	9.85e-07
SULF2	20q13.12	12.51	11.95	1.04686	1.05	1.18	5.32e-08	9.87e-07
YDJC	22q11.21	7.92	8.28	0.956522	0.67	0.82	5.34e-08	9.9e-07
SH3RF3	2q13	7.43	6.89	1.07837	1.04	0.95	5.38e-08	9.95e-07
SPAG5	17q11.2	8.78	9.34	0.940043	1.07	1.15	5.39e-08	9.95e-07
MSL1	17q21.1	11.01	11.28	0.976064	0.44	0.87	5.41e-08	9.97e-07
PDHA1	Xp22.12	10.16	10.37	0.979749	0.38	0.58	5.42e-08	9.99e-07
CIT	12q24.23	8.18	8.67	0.943483	0.94	0.97	5.54e-08	1.019e-06
CDC45	22q11.21	6.46	7.24	0.892265	1.51	1.41	5.55e-08	1.019e-06
C1QTNF1	17q25.3	9.4	8.76	1.07306	1.24	1.07	5.62e-08	1.03e-06
NR5A2	1q32.1	6.39	5.83	1.09605	1.05	1.1	5.64e-08	1.032e-06
RCE1	11q13.2	8.31	8.58	0.968531	0.5	0.62	5.66e-08	1.035e-06
MTMR14	3p25.3	9.51	9.69	0.981424	0.33	0.41	5.71e-08	1.042e-06
UTRN	6q24.2	11.25	10.84	1.03782	0.78	0.9	5.76e-08	1.049e-06
COL1A2	7q21.3	16.76	15.93	1.0521	1.61	1.39	5.77e-08	1.049e-06
SEMA5A	5p15.31	9.79	9.14	1.07112	1.22	1.31	5.77e-08	1.049e-06
CCDC138	2q13	5.53	5.97	0.926298	0.82	0.91	5.83e-08	1.059e-06
TIGD5	8q24.3	7.17	7.61	0.942181	0.83	0.91	5.86e-08	1.062e-06
BCS1L	2q35	8.12	8.37	0.970131	0.47	0.51	5.88e-08	1.064e-06
GAS7	17p13.1	10.01	9.4	1.06489	1.16	1.22	5.98e-08	1.08e-06
PLEKHJ1	19p13.3	8.95	9.31	0.961332	0.68	0.71	5.99e-08	1.081e-06
ZFHX4	8q21.13	8.24	7.44	1.10753	1.54	1.38	6.05e-08	1.091e-06
HIPK3	11p13	10.21	9.74	1.04825	0.81	1.35	6.07e-08	1.093e-06
UBE2C	20q13.12	8.32	9.1	0.914286	1.47	1.48	6.11e-08	1.098e-06
MRPS26	20p13	9.36	9.69	0.965944	0.62	0.73	6.17e-08	1.108e-06
LAMB1	7q31.1	12.17	11.66	1.04374	0.98	0.87	6.27e-08	1.123e-06
FGD5	3p25.1	9.3	8.8	1.05682	0.95	1.06	6.28e-08	1.123e-06
EXOSC4	8q24.3	8.35	8.79	0.949943	0.82	0.94	6.29e-08	1.125e-06
DNAJB4	1p31.1	8.57	8.14	1.05283	0.83	0.72	6.31e-08	1.125e-06
OTUB1	11q13.1	10.65	10.86	0.980663	0.38	0.5	6.39e-08	1.14e-06
DNMT1	19p13.2	10.69	10.97	0.974476	0.52	0.63	6.41e-08	1.14e-06
JMJD4	1q42.13	9.16	9.5	0.964211	0.63	0.71	6.51e-08	1.156e-06
CDC6	17q21.2	8.01	8.67	0.923875	1.24	1.37	6.54e-08	1.16e-06
LMNB2	19p13.3	10.07	10.43	0.965484	0.67	0.76	6.55e-08	1.16e-06
SEPHS1	10p13	10.09	10.33	0.976767	0.45	0.61	6.61e-08	1.17e-06
TCF3	19p13.3	10.31	10.62	0.97081	0.58	0.67	6.65e-08	1.176e-06
LATS2	13q12.11	9.12	8.68	1.05069	0.86	0.73	6.72e-08	1.185e-06
TMEM119	12q23.3	9.96	9.25	1.07676	1.38	1.24	6.81e-08	1.201e-06
UBE2J2	1p36.33	9.4	9.64	0.975104	0.44	0.54	6.84e-08	1.204e-06
BCL6B	17p13.1	8.42	7.95	1.05912	0.9	0.81	6.96e-08	1.223e-06
SH2B3	12q24.12	9.81	9.47	1.0359	0.66	0.63	7.01e-08	1.231e-06
ORC1	1p32.3	5.97	6.66	0.896396	1.31	1.31	7.07e-08	1.239e-06
PDCD5	19q13.11	9.3	9.58	0.970772	0.51	0.74	7.09e-08	1.241e-06
SPIRE2	16q24.3	6.56	7.12	0.921348	1.05	1.13	7.17e-08	1.254e-06
CCDC167	6p21.2	7.89	8.27	0.954051	0.71	0.8	7.25e-08	1.265e-06
KIRREL1	1q23.1	8.03	7.29	1.10151	1.4	1.64	7.26e-08	1.265e-06
MCM10	10p13	6.75	7.54	0.895225	1.5	1.53	7.33e-08	1.276e-06
ADAMTS5	21q21.3	8.29	7.58	1.09367	1.37	1.24	7.34e-08	1.276e-06
SERPING1	11q12.1	12.71	12.14	1.04695	1.11	1	7.4e-08	1.284e-06
PBK	8p21.1	7.21	7.91	0.911504	1.35	1.29	7.41e-08	1.285e-06
RASSF8	12p12.1	9.13	8.6	1.06163	0.99	1.21	7.47e-08	1.294e-06
TAF6	7q22.1	10.09	10.31	0.978661	0.41	0.5	7.48e-08	1.294e-06
KIF11	10q23.33	8.99	9.51	0.945321	1	1.01	7.53e-08	1.301e-06
SLC7A5	16q24.2	9.83	10.55	0.931754	1.36	1.65	7.81e-08	1.345e-06
VIM	10p13	14.59	14.08	1.03622	0.99	0.86	7.81e-08	1.345e-06
UNC5B	10q22.1	10.83	10.33	1.0484	0.95	0.97	7.84e-08	1.346e-06
RHOBTB1	10q21.2	9.1	8.78	1.03645	0.59	0.77	7.84e-08	1.346e-06
PRC1	15q26.1	9.48	10.02	0.946108	1.05	1.06	7.85e-08	1.347e-06
NOC2LP2	2q21.1	4.79	5.13	0.933723	0.64	0.66	7.92e-08	1.357e-06
SLC4A5	2p13.1	7.68	8.01	0.958801	0.63	0.66	7.94e-08	1.358e-06
PRDM15	21q22.3	7.73	7.92	0.97601	0.37	0.4	8.13e-08	1.388e-06
IGFBP6	12q13.13	7.49	6.84	1.09503	1.24	1.26	8.14e-08	1.388e-06
TMED7	5q22.3	11.47	11.19	1.02502	0.51	0.67	8.22e-08	1.4e-06
UQCC3	11q12.3	7.91	8.35	0.947305	0.84	1.01	8.23e-08	1.4e-06
PDSS1	10p12.1	6.25	6.64	0.941265	0.73	0.86	8.26e-08	1.404e-06
MRPS17	7p11.2	8.02	8.31	0.965102	0.54	0.66	8.27e-08	1.404e-06
C1R	12p13.31	12.35	11.8	1.04661	1.08	1.08	8.36e-08	1.417e-06
TIMM44	19p13.2	8.71	9.03	0.964563	0.61	0.69	8.64e-08	1.461e-06
KLHL17	1p36.33	6.09	6.53	0.932619	0.84	0.9	8.65e-08	1.461e-06
ILF2	1q21.3	12.12	12.37	0.97979	0.48	0.61	8.66e-08	1.461e-06
EBP	Xp11.23	9.23	9.58	0.963466	0.68	0.72	8.68e-08	1.463e-06
NCL	2q37.1	13.51	13.68	0.987573	0.33	0.42	8.78e-08	1.478e-06
CENPW	6q22.32	6.68	7.27	0.918845	1.12	1.29	8.79e-08	1.479e-06
COX7A1	19q13.12	6.93	6.24	1.11058	1.34	1.31	8.87e-08	1.49e-06
PROCR	20q11.22	8.05	7.62	1.05643	0.83	0.87	8.91e-08	1.493e-06
CDCA2	8p21.2	6.41	7.1	0.902817	1.34	1.39	8.92e-08	1.494e-06
CALCOCO1	12q13.13	10.6	10.35	1.02415	0.47	0.65	8.97e-08	1.5e-06
TMEM177	2q14.2	7.48	7.72	0.968912	0.46	0.54	8.99e-08	1.502e-06
RAD51AP1	12p13.32	7.11	7.69	0.924577	1.11	1.1	9.01e-08	1.502e-06
PAFAH1B3	19q13.2	9.77	10.16	0.961614	0.75	0.81	9.03e-08	1.504e-06
PLPP1	5q11.2	9.71	9.24	1.05087	0.92	0.81	9.05e-08	1.506e-06
TIMELESS	12q13.3	9.57	9.93	0.963746	0.7	0.71	9.16e-08	1.522e-06
FCHO2	5q13.2	9.69	9.43	1.02757	0.47	0.69	9.18e-08	1.523e-06
MOGS	2p13.1	10.23	10.44	0.979885	0.41	0.5	9.23e-08	1.529e-06
TSC22D1	13q14.11	12.12	11.85	1.02278	0.52	0.63	9.27e-08	1.534e-06
FKBP7	2q31.2	8.38	7.96	1.05276	0.83	0.69	9.46e-08	1.558e-06
GOLGA2P10	15q25.2	8.08	8.61	0.938444	1.03	0.97	9.46e-08	1.558e-06
MDH2	7q11.23	11.69	11.91	0.981528	0.41	0.52	9.47e-08	1.558e-06
CLDN3	7q11.23	9.28	10.07	0.921549	1.54	1.46	9.47e-08	1.558e-06
C19ORF57	19p13.12	5.45	6	0.908333	1.06	1.15	9.48e-08	1.558e-06
PDGFRA	4q12	10.46	9.75	1.07282	1.38	1.41	9.5e-08	1.56e-06
PODN	1p32.3	10.31	9.54	1.08071	1.48	1.54	9.57e-08	1.57e-06
VCAN	5q14.2-q14.3	13.36	12.58	1.062	1.52	1.34	9.64e-08	1.579e-06
MIR22HG	17p13.3	7.11	6.71	1.05961	0.79	0.75	9.68e-08	1.585e-06
TPX2	20q11.21	9.72	10.35	0.93913	1.21	1.26	9.72e-08	1.588e-06
RRP1	21q22.3	8.82	9.19	0.959739	0.71	0.81	9.82e-08	1.603e-06
ELL2	5q15	10.36	9.96	1.04016	0.76	0.92	9.91e-08	1.615e-06
CCT3	1q22	12.87	13.14	0.979452	0.53	0.54	9.92e-08	1.615e-06
NAV3	12q21.2	7.11	6.25	1.1376	1.64	1.83	9.94e-08	1.616e-06
GMEB2	20q13.33	8.9	9.13	0.974808	0.45	0.45	9.97e-08	1.618e-06
NAT10	11p13	10.47	10.68	0.980337	0.4	0.54	9.99e-08	1.62e-06
C1ORF35	1q42.13	8.05	8.42	0.956057	0.7	0.81	1.02e-07	1.651e-06
SMYD5	2p13.2	9.32	9.48	0.983122	0.31	0.4	1.03e-07	1.661e-06
HMG20B	19p13.3	10.59	10.91	0.970669	0.6	0.72	1.03e-07	1.669e-06
U2AF2	19q13.42	11.41	11.61	0.982773	0.38	0.45	1.04e-07	1.669e-06
TACC1	8p11.22	10.96	10.37	1.05689	1.16	1.09	1.04e-07	1.669e-06
ANKRD39	2q11.2	7.07	7.38	0.957995	0.58	0.74	1.05e-07	1.684e-06
SPOCK1	5q31.2	10.01	9.18	1.09041	1.63	1.5	1.05e-07	1.687e-06
DNAJC18	5q31.2	7.04	6.7	1.05075	0.67	0.65	1.06e-07	1.698e-06
ISM1	20p12.1	7.83	7.05	1.11064	1.51	1.48	1.06e-07	1.7e-06
CLEC5A	7q34	7.13	6.35	1.12283	1.52	1.55	1.06e-07	1.702e-06
YAP1	11q22.1	11.33	10.99	1.03094	0.65	0.81	1.07e-07	1.718e-06
NCAPG2	7q36.3	8.99	9.37	0.959445	0.72	0.81	1.08e-07	1.722e-06
UBR1	15q15.2	9.89	9.6	1.03021	0.54	0.78	1.08e-07	1.722e-06
SPRY1	4q28.1	9.63	9	1.07	1.25	1.07	1.09e-07	1.73e-06
CABLES2	20q13.33	8.15	8.5	0.958824	0.66	0.76	1.1e-07	1.748e-06
DBF4B	17q21.31|17q21	6.82	7.15	0.953846	0.64	0.76	1.1e-07	1.754e-06
MCFD2	2p21	11.38	11.16	1.01971	0.42	0.49	1.12e-07	1.772e-06
SNRPB	20p13	11.28	11.57	0.974935	0.55	0.69	1.12e-07	1.772e-06
PRKD1	14q12	7.02	6.37	1.10204	1.31	1.11	1.13e-07	1.79e-06
THOP1	19p13.3	8.96	9.32	0.961373	0.71	0.73	1.13e-07	1.792e-06
SRPX2	Xq22.1	8.8	8.2	1.07317	1.18	1.18	1.13e-07	1.792e-06
SNED1	2q37.3	9.3	8.78	1.05923	1.01	1.11	1.15e-07	1.814e-06
DHCR7	11q13.4	10.1	10.62	0.951036	1.01	1.07	1.16e-07	1.82e-06
ATG4D	19p13.2	8.18	8.47	0.965762	0.56	0.64	1.16e-07	1.82e-06
COL15A1	9q22.33	11.56	11.01	1.04995	1.09	0.95	1.16e-07	1.826e-06
SLC6A6	3p25.1	10.42	10.01	1.04096	0.8	0.82	1.16e-07	1.826e-06
SLC25A39	17q21.31	11.17	11.45	0.975546	0.52	0.67	1.17e-07	1.833e-06
ZSCAN16	6p22.1	7	7.32	0.956284	0.64	0.64	1.17e-07	1.833e-06
EDC4	16q22.1	10	10.22	0.978474	0.43	0.49	1.18e-07	1.844e-06
PRR5L	11p13-p12	7.79	7.33	1.06276	0.9	0.88	1.19e-07	1.859e-06
UHRF1	19p13.3	7.91	8.52	0.928404	1.2	1.14	1.19e-07	1.859e-06
SORBS1	10q24.1	10.21	9.55	1.06911	1.3	1.16	1.19e-07	1.859e-06
RBM17	10p15.1	10.36	10.57	0.980132	0.39	0.55	1.2e-07	1.86e-06
MRPL2	6p21.1	8.57	8.85	0.968362	0.52	0.74	1.2e-07	1.861e-06
COMMD7	20q11.21	10.25	10.48	0.978053	0.45	0.48	1.2e-07	1.863e-06
LRFN4	11q13.2	8	8.51	0.940071	0.97	1.16	1.21e-07	1.877e-06
NNMT	11q23.2	10.95	10.33	1.06002	1.23	1.14	1.22e-07	1.888e-06
NDN	15q11.2	8.3	7.71	1.07652	1.16	1.12	1.22e-07	1.891e-06
BUB1	2q13	8.07	8.72	0.925459	1.28	1.29	1.24e-07	1.908e-06
NOC4L	12q24.33	8.18	8.47	0.965762	0.55	0.65	1.25e-07	1.933e-06
TJP1	15q13.1	11	10.75	1.02326	0.46	0.62	1.26e-07	1.94e-06
MED24	17q21.1	10.49	10.82	0.969501	0.6	0.89	1.27e-07	1.954e-06
ABCC10	6p21.1	8.49	8.72	0.973624	0.45	0.55	1.27e-07	1.954e-06
CILP2	19p13.11	8.36	7.55	1.10728	1.58	1.54	1.28e-07	1.97e-06
COL5A1	9q34.3	13.43	12.68	1.05915	1.5	1.28	1.29e-07	1.986e-06
CENPU	4q35.1	8.46	8.98	0.942094	1.04	0.98	1.3e-07	1.987e-06
PSMB3	17q12	10.75	11.02	0.975499	0.47	0.82	1.3e-07	1.989e-06
FKBP9	7p14.3	11.83	11.51	1.0278	0.65	0.56	1.3e-07	1.995e-06
VEGFC	4q34.3	7.72	7.26	1.06336	0.91	0.84	1.31e-07	2.001e-06
FZD4	11q14.2	10.21	9.74	1.04825	0.92	0.97	1.31e-07	2.002e-06
MCRS1	12q13.12	9.7	9.9	0.979798	0.38	0.4	1.32e-07	2.012e-06
NLRP3	1q44	6.36	5.85	1.08718	0.99	1.12	1.32e-07	2.014e-06
ANKH	5p15.2	10.99	10.49	1.04766	0.98	0.96	1.35e-07	2.045e-06
SHE	1q21.3	7.55	7	1.07857	1.1	1.07	1.35e-07	2.046e-06
ELFN1	7p22.3	5.68	5.19	1.09441	0.98	0.91	1.35e-07	2.046e-06
WDR5	9q34.2	9.79	9.98	0.980962	0.37	0.48	1.35e-07	2.049e-06
SFPQ	1p34.3	12.15	12.32	0.986201	0.34	0.33	1.36e-07	2.053e-06
KIAA0825	5q15	6.39	5.97	1.07035	0.78	1.1	1.36e-07	2.053e-06
TRIM27	6p22.1	10.4	10.58	0.982987	0.34	0.39	1.38e-07	2.087e-06
TOR1AIP1	1q25.2	11	10.78	1.02041	0.42	0.56	1.38e-07	2.087e-06
COL1A1	17q21.33	17.14	16.34	1.04896	1.6	1.42	1.41e-07	2.116e-06
MAPK13	6p21.31	9.92	10.24	0.96875	0.64	0.66	1.43e-07	2.149e-06
KNSTRN	15q15.1	8.12	8.47	0.958678	0.68	0.76	1.45e-07	2.173e-06
RPUSD1	16p13.3	8.74	9.06	0.96468	0.62	0.73	1.45e-07	2.178e-06
CTXN1	19p13.2	7.94	8.53	0.930832	1.14	1.24	1.48e-07	2.207e-06
CAVIN1	17q21.2	12.56	12.02	1.04493	1.08	0.92	1.48e-07	2.207e-06
MIIP	1p36.22	8.03	8.38	0.958234	0.67	0.8	1.48e-07	2.207e-06
DDX49	19p13.11	9.6	9.88	0.97166	0.53	0.62	1.48e-07	2.207e-06
DYNC2H1	11q22.3	8.87	8.31	1.06739	1.1	1.28	1.48e-07	2.207e-06
VSIG4	Xq12	8.38	7.78	1.07712	1.17	1.22	1.48e-07	2.207e-06
NCAPG	4p15.31	8.05	8.65	0.930636	1.19	1.18	1.49e-07	2.215e-06
GAR1	4q25	8.42	8.65	0.97341	0.44	0.55	1.51e-07	2.238e-06
MEN1	11q13.1	9.78	9.99	0.978979	0.4	0.51	1.51e-07	2.247e-06
CD109	6q13	10.11	9.45	1.06984	1.3	1.37	1.52e-07	2.251e-06
HGS	17q25.3	10.56	10.8	0.977778	0.47	0.55	1.52e-07	2.251e-06
ZSCAN21	7q22.1	7.72	7.91	0.97598	0.38	0.43	1.52e-07	2.251e-06
TMEM132A	11q12.2	10.03	10.59	0.94712	1.11	1.17	1.54e-07	2.271e-06
COX19	7p22.3	7.66	7.92	0.967172	0.5	0.55	1.54e-07	2.279e-06
LOXL1	15q24.1	10.29	9.75	1.05538	1.05	1.09	1.57e-07	2.315e-06
CDK5RAP1	20q11.21	8.89	9.09	0.977998	0.4	0.46	1.58e-07	2.321e-06
CDCA4	14q32.33	8.34	8.67	0.961938	0.66	0.7	1.65e-07	2.421e-06
C1QTNF3	5p13.2	9.13	8.23	1.10936	1.8	1.5	1.65e-07	2.421e-06
POLQ	3q13.33	6.34	7	0.905714	1.3	1.27	1.69e-07	2.48e-06
PPIA	7p13	12.1	12.33	0.981346	0.44	0.54	1.71e-07	2.501e-06
PGM5	9q21.11	7.04	6.16	1.14286	1.77	1.68	1.71e-07	2.505e-06
LILRA2	19q13.42	5.67	5.12	1.10742	1.05	1.27	1.72e-07	2.506e-06
RHOQ	2p21	10.62	10.31	1.03007	0.61	0.62	1.72e-07	2.506e-06
NDC80	18p11.32	7.32	7.95	0.920755	1.24	1.3	1.72e-07	2.506e-06
SYT11	1q22	8.61	8.15	1.05644	0.92	0.86	1.72e-07	2.506e-06
BBS12	4q27	7.2	6.89	1.04499	0.61	0.68	1.73e-07	2.522e-06
WRNIP1	6p25.2	10.04	10.25	0.979512	0.41	0.5	1.77e-07	2.565e-06
SLC12A4	16q22.1	9.7	9.35	1.03743	0.7	0.69	1.77e-07	2.565e-06
BGN	Xq28	14.11	13.53	1.04287	1.16	1.01	1.77e-07	2.565e-06
PPIH	1p34.2	8.39	8.64	0.971065	0.46	0.61	1.79e-07	2.597e-06
PLK4	4q28.1	7.21	7.68	0.938802	0.93	0.97	1.81e-07	2.625e-06
PEAK1	15q24.3	10.26	9.85	1.04162	0.82	0.7	1.82e-07	2.625e-06
CPE	4q32.3	11.1	10.51	1.05614	1.16	1.29	1.82e-07	2.625e-06
CDK1	10q21.2	9.06	9.64	0.939834	1.15	1.14	1.9e-07	2.745e-06
POLE2	14q21.3	6.04	6.52	0.92638	0.95	0.92	1.91e-07	2.758e-06
EIF2AK1	7p22.1	12.18	12.38	0.983845	0.4	0.42	1.93e-07	2.774e-06
F2R	5q13.3	10.83	10.33	1.0484	0.98	1.02	1.93e-07	2.774e-06
ARHGEF12	11q23.3	12.23	11.94	1.02429	0.56	0.72	1.95e-07	2.803e-06
FANCE	6p21.31	6.57	6.96	0.943966	0.76	0.88	1.96e-07	2.815e-06
ADAMTSL2	9q34.2	7.64	7.04	1.08523	1.19	1.19	2e-07	2.869e-06
CDC25C	5q31.2	5.79	6.54	0.885321	1.52	1.27	2.01e-07	2.87e-06
MXRA5	Xp22.33	13.24	12.51	1.05835	1.48	1.21	2.01e-07	2.87e-06
MRPL4	19p13.2	9.41	9.69	0.971104	0.54	0.71	2.02e-07	2.881e-06
EXOSC5	19q13.2	8.39	8.7	0.964368	0.62	0.72	2.04e-07	2.907e-06
NAA10	Xq28	9.5	9.77	0.972364	0.52	0.68	2.05e-07	2.92e-06
DOCK1	10q26.2	10.84	10.56	1.02652	0.54	0.71	2.06e-07	2.927e-06
GIT2	12q24.11	10.25	10.07	1.01787	0.36	0.39	2.06e-07	2.933e-06
DCLRE1C	10p13	8.06	8.29	0.972256	0.43	0.62	2.08e-07	2.947e-06
PDE1A	2q32.1	6.05	5.39	1.12245	1.33	1.25	2.1e-07	2.974e-06
RITA1	12q24.13	8.77	8.99	0.975528	0.43	0.47	2.1e-07	2.976e-06
PTEN	10q23.31	11.09	10.81	1.0259	0.55	0.69	2.1e-07	2.976e-06
FAM114A2	5q33.2	9.06	8.81	1.02838	0.48	0.6	2.11e-07	2.982e-06
RASSF7	11p15.5	8.44	8.93	0.945129	0.99	1.01	2.13e-07	3.002e-06
TCP11L2	12q23.3	7.14	6.73	1.06092	0.78	1.01	2.15e-07	3.03e-06
UPF3B	Xq24	7.9	8.18	0.96577	0.54	0.65	2.15e-07	3.03e-06
C3ORF67	3p14.2	5.12	5.72	0.895105	1.19	1.34	2.18e-07	3.071e-06
MFAP4	17p11.2	9.97	9.04	1.10288	1.86	1.92	2.19e-07	3.073e-06
NSDHL	Xq28	8.97	9.19	0.976061	0.43	0.54	2.2e-07	3.08e-06
CHERP	19p13.11	10.24	10.44	0.980843	0.39	0.44	2.2e-07	3.08e-06
MAFB	20q12	10.5	10.08	1.04167	0.84	0.83	2.2e-07	3.08e-06
DCAF15	19p13.12	8.55	8.8	0.971591	0.48	0.6	2.2e-07	3.08e-06
ZFP36L1	14q24.1	12.96	12.63	1.02613	0.64	0.83	2.21e-07	3.092e-06
MBNL1	3q25.1-q25.2	11.53	11.25	1.02489	0.55	0.54	2.21e-07	3.092e-06
KCNE3	11q13.4	7.05	6.68	1.05539	0.74	0.72	2.22e-07	3.095e-06
DNAJC2	7q22.1	9.32	9.54	0.976939	0.43	0.55	2.23e-07	3.103e-06
NSD2	4p16.3	10.54	10.82	0.974122	0.55	0.63	2.24e-07	3.123e-06
PMS2P1	7q22.1	8.12	8.31	0.977136	0.38	0.45	2.26e-07	3.148e-06
LINC00312	3p25.3	5.41	4.82	1.12241	1.2	1.09	2.27e-07	3.151e-06
C11ORF80	11q13.2	7.99	8.46	0.944444	0.92	0.96	2.29e-07	3.175e-06
LEPR	1p31.3	7.93	7.28	1.08929	1.33	1.23	2.35e-07	3.253e-06
REPIN1	7q36.1	10.92	11.2	0.975	0.56	0.57	2.37e-07	3.285e-06
NSUN5P2	7q11.23	7.29	7.81	0.933419	1.06	1.02	2.39e-07	3.304e-06
VGLL3	3p12.1	8.45	7.64	1.10602	1.66	1.26	2.4e-07	3.31e-06
SNRK	3p22.1	10.09	9.83	1.02645	0.52	0.54	2.4e-07	3.316e-06
BUB1B	15q15.1	7.91	8.5	0.930588	1.19	1.17	2.47e-07	3.4e-06
SMIM10	Xq26.3	6.17	5.66	1.09011	1.04	0.95	2.47e-07	3.401e-06
COG4	16q22.1	9.82	10.04	0.978088	0.43	0.52	2.48e-07	3.413e-06
ROR2	9q22.31	8.95	8.39	1.06675	1.12	1.26	2.56e-07	3.515e-06
GTF2IRD1	7q11.23	9.21	9.47	0.972545	0.51	0.54	2.56e-07	3.519e-06
EML1	14q32.2	8.56	8.14	1.0516	0.82	0.94	2.58e-07	3.537e-06
SNHG1	11q12.3	8.88	9.31	0.953813	0.88	0.89	2.58e-07	3.537e-06
FMNL3	12q13.12	10.17	9.8	1.03776	0.76	0.7	2.59e-07	3.537e-06
SETBP1	18q12.3	9.24	8.7	1.06207	1.07	1.24	2.62e-07	3.58e-06
HASPIN	17p13.2	5.11	5.68	0.899648	1.13	1.13	2.62e-07	3.581e-06
UFSP2	4q35.1	9.26	9.07	1.02095	0.36	0.47	2.63e-07	3.589e-06
WRAP73	1p36.32	8.37	8.63	0.969873	0.52	0.5	2.66e-07	3.618e-06
NPR2	9p13.3	7.53	7.01	1.07418	1.05	1.03	2.66e-07	3.627e-06
BRMS1	11q13.2	9.6	9.88	0.97166	0.54	0.69	2.69e-07	3.653e-06
HECW2	2q32.3	8.08	7.6	1.06316	0.96	0.95	2.7e-07	3.661e-06
RBFOX2	22q12.3	10.98	10.73	1.0233	0.5	0.53	2.71e-07	3.677e-06
OLFML2B	1q23.3	10.75	10.11	1.0633	1.34	0.99	2.76e-07	3.746e-06
MAP3K20	2q31.1	10.67	10.31	1.03492	0.72	0.82	2.83e-07	3.83e-06
GMNN	6p22.3	7.88	8.26	0.953995	0.74	0.86	2.85e-07	3.858e-06
PDAP1	7q22.1	10.78	11.03	0.977335	0.5	0.55	2.86e-07	3.86e-06
PHLDB1	11q23.3	10.96	10.59	1.03494	0.75	0.66	2.89e-07	3.893e-06
CEP55	10q23.33	7.93	8.53	0.92966	1.22	1.28	2.91e-07	3.921e-06
AQP1	7p14.3	11.76	11.17	1.05282	1.22	1.12	2.92e-07	3.934e-06
TTK	6q14.1	7.26	7.92	0.916667	1.35	1.33	2.96e-07	3.987e-06
TEK	9p21.2	8.17	7.57	1.07926	1.23	1.14	2.98e-07	4.006e-06
ATP5MF	7q22.1	10.31	10.63	0.969897	0.62	0.75	2.98e-07	4.006e-06
SRRT	7q22.1	10.68	10.9	0.979817	0.45	0.45	2.99e-07	4.008e-06
TBL2	7q11.23	10.01	10.21	0.980411	0.38	0.48	2.99e-07	4.008e-06
PLBD2	12q24.13	9.77	9.49	1.0295	0.56	0.57	3e-07	4.011e-06
CEP112	17q24.1	6.75	6.21	1.08696	1.1	1.04	3.02e-07	4.041e-06
YRDC	1p34.3	8.36	8.59	0.973225	0.46	0.54	3.03e-07	4.044e-06
VPS72	1q21.3	9.92	10.17	0.975418	0.51	0.59	3.04e-07	4.054e-06
NCAPD2	12p13.31	10.5	10.82	0.970425	0.64	0.8	3.04e-07	4.054e-06
LGALS1	22q13.1	12.65	12.23	1.03434	0.85	0.93	3.05e-07	4.065e-06
MAN1C1	1p36.11	8.42	7.91	1.06448	1.01	1.21	3.06e-07	4.074e-06
CCNDBP1	15q15.2	9.77	9.49	1.0295	0.54	0.62	3.07e-07	4.084e-06
KIF4A	Xq13.1	8.17	8.85	0.923164	1.41	1.28	3.11e-07	4.132e-06
FANCD2	3p25.3	8.33	8.74	0.953089	0.83	0.81	3.12e-07	4.139e-06
TNFRSF10D	8p21.3	6.01	5.36	1.12127	1.3	1.35	3.14e-07	4.162e-06
EFEMP1	2p16.1	10.96	10.22	1.07241	1.49	1.55	3.17e-07	4.19e-06
ZBTB4	17p13.1	11.27	11.02	1.02269	0.5	0.6	3.21e-07	4.239e-06
DDX55	12q24.31	8.69	8.9	0.976404	0.4	0.48	3.21e-07	4.241e-06
PROS1	3q11.1	8.98	8.42	1.06651	1.16	1.08	3.25e-07	4.287e-06
EVI5	1p22.1	8.67	8.43	1.02847	0.48	0.56	3.29e-07	4.33e-06
SGO1	3p24.3	5.5	6.24	0.88141	1.53	1.39	3.32e-07	4.367e-06
MTIF2	2p16.1	9.53	9.72	0.980453	0.38	0.43	3.34e-07	4.385e-06
GEN1	2p24.2	8.16	8.5	0.96	0.7	0.71	3.34e-07	4.391e-06
NELFE	6p21.33	10.06	10.29	0.977648	0.44	0.55	3.36e-07	4.408e-06
NRP2	2q33.3	10.16	9.65	1.05285	1.04	0.95	3.4e-07	4.457e-06
ERCC6L	Xq13.1	6.42	7	0.917143	1.19	1.13	3.45e-07	4.52e-06
METTL2A	17q23.2	8.74	8.97	0.974359	0.43	0.59	3.46e-07	4.527e-06
MR1	1q25.3	8.11	7.76	1.0451	0.7	0.83	3.48e-07	4.542e-06
IGFBP3	7p12.3	11.68	11.18	1.04472	1.04	0.96	3.48e-07	4.542e-06
TPST2	22q12.1	9.29	8.97	1.03567	0.65	0.73	3.48e-07	4.542e-06
GLT8D2	12q23.3	8.8	8.11	1.08508	1.42	1.28	3.53e-07	4.594e-06
TMEM201	1p36.22	8.21	8.49	0.96702	0.58	0.61	3.61e-07	4.693e-06
GIPC3	19p13.3	7	6.61	1.059	0.79	0.81	3.62e-07	4.71e-06
PRELP	1q32.1	10.08	9.3	1.08387	1.59	1.59	3.63e-07	4.71e-06
KIAA1841	2p15	7.78	8.07	0.964064	0.58	0.67	3.64e-07	4.724e-06
COL8A2	1p34.3	10.56	9.82	1.07536	1.52	1.43	3.65e-07	4.724e-06
TEDC1	14q32.33	7.03	7.52	0.93484	0.99	1.03	3.66e-07	4.74e-06
LOXL2	8p21.3	10.8	10.17	1.06195	1.32	1.01	3.69e-07	4.777e-06
ST20	15q25.1	5.55	5.91	0.939086	0.72	0.85	3.72e-07	4.802e-06
EPCAM	2p21	11.62	12.2	0.952459	1.21	0.82	3.81e-07	4.919e-06
IL13RA1	Xq24	12.17	11.91	1.02183	0.52	0.66	3.84e-07	4.953e-06
UQCRHL	1p36.21	8.31	8.64	0.961806	0.66	0.79	3.85e-07	4.965e-06
CLIP3	19q13.12	8.75	8.29	1.05549	0.95	0.9	3.86e-07	4.967e-06
IRAK1	Xq28	10.97	11.28	0.972518	0.62	0.78	3.87e-07	4.971e-06
CCNB1	5q13.2	9.4	9.88	0.951417	0.98	0.94	3.89e-07	4.994e-06
PPP1R16A	8q24.3	9.12	9.56	0.953975	0.91	0.88	3.89e-07	4.994e-06
ATAD3A	1p36.33	8.59	9.06	0.948124	0.98	0.89	3.94e-07	5.048e-06
CALHM2	10q24.33	9.41	9.1	1.03407	0.61	0.66	3.95e-07	5.055e-06
MAP4	3p21.31	12.64	12.46	1.01445	0.37	0.41	3.95e-07	5.058e-06
MRPL14	6p21.1	9.46	9.76	0.969262	0.6	0.72	3.96e-07	5.058e-06
MRPS24	7p13	9.55	9.8	0.97449	0.5	0.62	3.97e-07	5.074e-06
ADAMTSL1	9p22.2-p22.1	7.16	6.5	1.10154	1.37	1.13	3.99e-07	5.085e-06
FLJ44635	Xq13.1	4.25	3.88	1.09536	0.73	0.91	4.01e-07	5.106e-06
ETS2	21q22.2	10.23	9.81	1.04281	0.87	0.83	4.02e-07	5.116e-06
MPDZ	9p23	9.65	9.33	1.0343	0.64	0.84	4.1e-07	5.207e-06
JPT1	17q25.1	10.53	10.94	0.962523	0.83	0.97	4.1e-07	5.207e-06
ADAMTS2	5q35.3	9.34	8.59	1.08731	1.57	1.46	4.11e-07	5.211e-06
SSPN	12p12.1	9.5	8.98	1.05791	1.07	1.03	4.12e-07	5.22e-06
C19ORF48	19q13.33	9.58	9.95	0.962814	0.74	0.8	4.12e-07	5.221e-06
CCDC77	12p13.33	7.25	7.56	0.958995	0.62	0.76	4.14e-07	5.238e-06
CCZ1P-OR7E38P	7q21.3	5.86	6.33	0.92575	0.95	1.16	4.18e-07	5.288e-06
SCYL1	11q13.1	10.63	10.84	0.980627	0.4	0.51	4.19e-07	5.289e-06
FAM131B	7q34	5.93	5.24	1.13168	1.42	1.52	4.2e-07	5.296e-06
SPRED1	15q14	10.12	9.72	1.04115	0.81	0.83	4.26e-07	5.37e-06
GLIPR1	12q21.2	9.38	8.93	1.05039	0.94	0.89	4.27e-07	5.373e-06
CAV2	7q31.2	9.38	8.79	1.06712	1.24	1.02	4.3e-07	5.403e-06
ACKR4	3q22.1	6.13	5.34	1.14794	1.68	1.25	4.4e-07	5.523e-06
SH3GLB1	1p22.3	11.46	11.26	1.01776	0.41	0.43	4.4e-07	5.523e-06
OAF	11q23.3	9.35	8.95	1.04469	0.84	0.79	4.41e-07	5.525e-06
NAV1	1q32.1	10.68	10.34	1.03288	0.66	0.95	4.43e-07	5.542e-06
SNX18	5q11.2	9.82	9.57	1.02612	0.51	0.57	4.43e-07	5.542e-06
NOL10	2p25.1	9.45	9.65	0.979275	0.39	0.48	4.49e-07	5.61e-06
FOSL2	2p23.2	10.92	10.55	1.03507	0.76	0.78	4.54e-07	5.674e-06
MSH2	2p21-p16.3	9.68	9.95	0.972864	0.54	0.65	4.56e-07	5.687e-06
NOM1	7q36.3	8.63	8.83	0.97735	0.4	0.49	4.57e-07	5.697e-06
PSMG3	7p22.3	8.82	9.13	0.966046	0.62	0.74	4.61e-07	5.736e-06
HNRNPD	4q21.22	11.77	11.95	0.984937	0.37	0.41	4.63e-07	5.758e-06
PDPN	1p36.21	9.01	8.31	1.08424	1.45	1.23	4.63e-07	5.758e-06
UBL3	13q12.3	10.65	10.33	1.03098	0.65	0.74	4.64e-07	5.759e-06
MTHFSD	16q24.1	7.76	8	0.97	0.48	0.6	4.66e-07	5.78e-06
FN1	2q35	16.8	16.04	1.04738	1.59	1.32	4.7e-07	5.826e-06
EPB41L2	6q23.1-q23.2	10.46	10.02	1.04391	0.91	0.94	4.75e-07	5.885e-06
ITSN1	21q22.11	9.84	9.53	1.03253	0.65	0.59	4.8e-07	5.941e-06
MUS81	11q13.1	8.7	8.94	0.973154	0.48	0.54	4.82e-07	5.951e-06
RP9	7p14.3	6.97	7.24	0.962707	0.55	0.65	4.86e-07	6.004e-06
THY1	11q23.3	12.05	11.53	1.0451	1.09	0.95	4.9e-07	6.038e-06
PLVAP	19p13.11	11.25	10.84	1.03782	0.86	0.78	4.91e-07	6.053e-06
MXRA8	1p36.33	11.38	10.79	1.05468	1.2	1.26	5.01e-07	6.171e-06
RORA	15q22.2	8.59	8.2	1.04756	0.79	0.85	5.1e-07	6.273e-06
DENND2A	7q34	6.42	5.92	1.08446	1.03	1.12	5.12e-07	6.285e-06
SWAP70	11p15.4	10.89	10.64	1.0235	0.51	0.62	5.14e-07	6.308e-06
GTSE1	22q13.31	7.02	7.59	0.924901	1.18	1.25	5.15e-07	6.321e-06
LRRC17	7q22.1	8.18	7.32	1.11749	1.78	1.8	5.17e-07	6.334e-06
CENPE	4q24	7.78	8.36	0.930622	1.19	1.27	5.19e-07	6.349e-06
FEZ2	2p22.2	9.76	9.55	1.02199	0.43	0.43	5.2e-07	6.35e-06
NHLRC3	13q13.3	9.36	9.13	1.02519	0.46	0.6	5.2e-07	6.35e-06
TMEM37	2q14.2	7.59	6.95	1.09209	1.36	1.04	5.21e-07	6.35e-06
MRGPRF	11q13.3	6.82	6.12	1.11438	1.47	1.37	5.21e-07	6.35e-06
CC2D1B	1p32.3	9.31	9.51	0.97897	0.42	0.44	5.27e-07	6.413e-06
ZDHHC12	9q34.11	9.07	9.38	0.966951	0.62	0.71	5.28e-07	6.413e-06
DNAAF5	7p22.3	9.55	9.74	0.980493	0.39	0.51	5.28e-07	6.413e-06
KCNMA1	10q22.3	9.42	8.7	1.08276	1.47	1.7	5.28e-07	6.413e-06
EVI2A	17q11.2	8.25	7.74	1.06589	1.05	1.04	5.3e-07	6.432e-06
DEPDC1B	5q12.1	6	6.67	0.89955	1.41	1.29	5.31e-07	6.432e-06
SNHG17	20q11.23	8.04	8.41	0.956005	0.74	0.86	5.38e-07	6.512e-06
ANKRD27	19q13.11	9.48	9.73	0.974306	0.5	0.67	5.48e-07	6.621e-06
HES4	1p36.33	5.14	5.8	0.886207	1.37	1.48	5.48e-07	6.621e-06
CEP131	17q25.3	7.9	8.37	0.943847	0.98	0.99	5.48e-07	6.621e-06
RTN4R	22q11.21	5.87	6.39	0.918623	1.08	1.08	5.49e-07	6.626e-06
MED30	8q24.11	7.25	7.54	0.961538	0.57	0.8	5.52e-07	6.648e-06
SRPX	Xp11.4	8.47	7.73	1.09573	1.57	1.33	5.57e-07	6.71e-06
RANBP1	22q11.21	9.63	9.88	0.974696	0.52	0.66	5.6e-07	6.743e-06
CDK16	Xp11.3	11	11.23	0.979519	0.46	0.56	5.62e-07	6.761e-06
IFNGR1	6q23.3	10.89	10.62	1.02542	0.55	0.64	5.64e-07	6.768e-06
RPP21	6p22.1	8.01	8.32	0.96274	0.63	0.77	5.65e-07	6.777e-06
GRK2	11q13.2	10.73	11.01	0.974569	0.58	0.6	5.65e-07	6.778e-06
ABHD4	14q11.2	9.99	9.71	1.02884	0.58	0.63	5.7e-07	6.825e-06
C8ORF82	8q24.3	8.33	8.69	0.958573	0.73	0.89	5.7e-07	6.825e-06
VPS37B	12q24.31	9.33	9.63	0.968847	0.61	0.66	5.73e-07	6.851e-06
CASP2	7q34	10.13	10.33	0.980639	0.42	0.53	5.81e-07	6.941e-06
RUNX2	6p21.1	8.82	8.22	1.07299	1.27	1.14	5.83e-07	6.949e-06
RBM28	7q32.1	8.55	8.79	0.972696	0.49	0.55	5.83e-07	6.949e-06
FLNC	7q32.1	8.01	7.18	1.1156	1.76	1.48	5.84e-07	6.951e-06
LRR1	14q21.3	7.56	7.82	0.966752	0.53	0.6	5.85e-07	6.958e-06
CBX3	7p15.2	12.02	12.24	0.982026	0.44	0.49	5.88e-07	6.985e-06
MMP19	12q13.2	8.84	8.44	1.04739	0.84	0.74	5.88e-07	6.985e-06
DNPH1	6p21.1	8.05	8.49	0.948174	0.89	1.05	5.93e-07	7.03e-06
CACNA2D4	12p13.33	5.81	5.37	1.08194	0.89	0.98	5.93e-07	7.03e-06
GPX8	5q11.2	10.08	9.58	1.05219	1.06	0.94	5.99e-07	7.099e-06
DUSP3	17q21.31	10.74	10.54	1.01898	0.41	0.51	6.08e-07	7.195e-06
DDX51	12q24.33	8.56	8.82	0.970522	0.53	0.57	6.15e-07	7.265e-06
OXSM	3p24.2	7.65	7.86	0.973282	0.42	0.47	6.23e-07	7.361e-06
FEM1C	5q22.3	10.06	9.76	1.03074	0.61	0.64	6.26e-07	7.384e-06
ENY2	8q23.1	9.28	9.57	0.969697	0.61	0.72	6.28e-07	7.401e-06
ATP10D	4p12	8.86	8.45	1.04852	0.84	0.92	6.28e-07	7.401e-06
SPRY2	13q31.1	7.97	7.44	1.07124	1.11	1.12	6.31e-07	7.428e-06
KNTC1	12q24.31	8.74	9.11	0.959385	0.76	0.78	6.39e-07	7.506e-06
DHX16	6p21.33	9.62	9.79	0.982635	0.36	0.41	6.41e-07	7.525e-06
MALSU1	7p15.3	8.11	8.29	0.978287	0.36	0.55	6.41e-07	7.525e-06
GLT8D1	3p21.1	10.27	10.09	1.01784	0.37	0.44	6.5e-07	7.62e-06
GNG10	9q31.3	8.99	8.73	1.02978	0.55	0.55	6.64e-07	7.777e-06
SLC22A4	5q31.1	6.42	5.88	1.09184	1.11	1.35	6.67e-07	7.803e-06
FNIP2	4q32.1	8.88	8.44	1.05213	0.89	1.19	6.69e-07	7.824e-06
TFCP2L1	2q14.2	7.58	8.48	0.893868	1.85	2.09	6.75e-07	7.882e-06
TAF6L	11q12.3	7.61	7.87	0.966963	0.55	0.59	6.77e-07	7.895e-06
EDA2R	Xq12	6.29	5.72	1.09965	1.18	1.29	6.79e-07	7.912e-06
NAALADL1	11q13.1	5.38	4.87	1.10472	1.07	1.06	6.88e-07	8.015e-06
S1PR1	1p21.2	9.07	8.51	1.0658	1.19	1.05	6.96e-07	8.104e-06
LOC100129034	9q33.3	10.86	10.59	1.0255	0.54	0.78	6.98e-07	8.114e-06
WDFY1	2q36.1	10.46	10.22	1.02348	0.49	0.53	6.99e-07	8.116e-06
EIF2B4	2p23.3	9.61	9.77	0.983623	0.33	0.4	7.02e-07	8.152e-06
VRK1	14q32.2	8	8.29	0.965018	0.59	0.62	7.04e-07	8.167e-06
NOP16	5q35.2	7.74	8.05	0.961491	0.64	0.74	7.05e-07	8.171e-06
SH3BGRL	Xq21.1	12.73	12.18	1.04516	1.12	1.27	7.09e-07	8.203e-06
LY96	8q21.11	6.93	6.48	1.06944	0.95	0.91	7.13e-07	8.247e-06
SIRT5	6p23	8.33	8.53	0.976553	0.43	0.53	7.14e-07	8.247e-06
IDS	Xq28	11.78	11.53	1.02168	0.53	0.61	7.17e-07	8.275e-06
SUV39H2	10p13	7.49	7.82	0.957801	0.66	0.81	7.23e-07	8.333e-06
MBD5	2q23.1	8.36	8.12	1.02956	0.48	0.62	7.28e-07	8.39e-06
BUD31	7q22.1	9.96	10.18	0.978389	0.44	0.56	7.31e-07	8.417e-06
TCHP	12q24.11	8.32	8.52	0.976526	0.4	0.44	7.35e-07	8.451e-06
SLC29A2	11q13.2	7.61	8.14	0.934889	1.1	1.19	7.35e-07	8.451e-06
HGH1	8q24.3	9.42	9.73	0.96814	0.65	0.8	7.38e-07	8.475e-06
CENPL	1q25.1	7.47	7.79	0.958922	0.65	0.72	7.44e-07	8.528e-06
ATAD3B	1p36.33	7.17	7.68	0.933594	1.07	1.1	7.46e-07	8.545e-06
DOCK10	2q36.2	9.19	8.73	1.05269	0.93	1.11	7.48e-07	8.563e-06
NME1	17q21.33	10.53	10.89	0.966942	0.72	0.93	7.49e-07	8.565e-06
CMC2	16q23.2	7.94	8.24	0.963592	0.63	0.75	7.49e-07	8.565e-06
RRP9	3p21.2	8.23	8.52	0.965962	0.61	0.64	7.56e-07	8.63e-06
CEP120	5q23.2	9.13	8.87	1.02931	0.51	0.65	7.58e-07	8.648e-06
NUDT5	10p14	9.5	9.74	0.975359	0.49	0.71	7.61e-07	8.68e-06
SLC39A14	8p21.3	10.57	10.23	1.03324	0.73	0.77	7.72e-07	8.786e-06
TRIM26	6p22.1	10.59	10.79	0.981464	0.4	0.46	7.81e-07	8.884e-06
NUDT1	7p22.3	7.5	7.85	0.955414	0.73	0.84	7.82e-07	8.884e-06
RFC5	12q24.23	8.38	8.65	0.968786	0.56	0.57	7.83e-07	8.895e-06
WDR4	21q22.3	7.18	7.5	0.957333	0.67	0.71	7.84e-07	8.899e-06
PARPBP	12q23.2	6.67	7.11	0.938115	0.91	0.92	7.89e-07	8.943e-06
CYCS	7p15.3	10.96	11.21	0.977698	0.49	0.63	7.96e-07	9.022e-06
TMEM173	5q31.2	9.49	9.16	1.03603	0.68	0.78	8.04e-07	9.099e-06
GSDMB	17q21.1	5.73	6.37	0.899529	1.34	1.52	8.07e-07	9.131e-06
IGFBP7	4q12	12.6	12.21	1.03194	0.84	0.77	8.13e-07	9.184e-06
FASTK	7q36.1	9.82	10.09	0.973241	0.56	0.69	8.21e-07	9.264e-06
LIMCH1	4p13	10.66	10.18	1.04715	0.96	1.25	8.25e-07	9.294e-06
HSP90AB1	6p21.1	14.82	15.05	0.984718	0.46	0.58	8.25e-07	9.294e-06
TRAF4	17q11.2	10.35	10.7	0.96729	0.72	0.75	8.26e-07	9.294e-06
SRSF7	2p22.1	10.9	11.05	0.986425	0.32	0.33	8.28e-07	9.308e-06
ECM1	1q21.2	10.96	10.14	1.08087	1.72	1.73	8.29e-07	9.308e-06
ZNF74	22q11.21	8.16	8.41	0.970273	0.5	0.58	8.3e-07	9.308e-06
PPAN	19p13.2	8.1	8.5	0.952941	0.84	0.96	8.3e-07	9.308e-06
AARS2	6p21.1	8.53	8.79	0.970421	0.56	0.53	8.38e-07	9.39e-06
APBB2	4p14-p13	11.29	10.92	1.03388	0.75	0.99	8.4e-07	9.404e-06
PELI2	14q22.3	7.35	6.79	1.08247	1.19	1.18	8.47e-07	9.479e-06
NOX4	11q14.3	7.8	7.17	1.08787	1.34	1.2	8.54e-07	9.541e-06
PMS2	7p22.1	9.38	9.55	0.982199	0.34	0.41	8.54e-07	9.541e-06
PCYT2	17q25.3	8.8	9.1	0.967033	0.64	0.71	8.57e-07	9.559e-06
YIF1B	19q13.2	9.13	9.4	0.971277	0.56	0.67	8.61e-07	9.605e-06
TRIM65	17q25.1	8.88	9.14	0.971554	0.53	0.65	8.65e-07	9.638e-06
PLXNA2	1q32.2	9.21	8.86	1.0395	0.7	0.99	8.67e-07	9.645e-06
HDGF	1q23.1	12.82	13.05	0.982375	0.48	0.6	8.69e-07	9.655e-06
MCAM	11q23.3	11.25	10.81	1.0407	0.97	0.78	8.69e-07	9.655e-06
KIF23	15q23	8.41	8.92	0.942825	1.09	1.07	8.78e-07	9.749e-06
AOC3	17q21.31	9.8	9.01	1.08768	1.74	1.22	8.79e-07	9.75e-06
GPC3	Xq26.2	8	7.09	1.12835	1.91	2.04	8.8e-07	9.758e-06
POU6F1	12q13.13	7.38	7.05	1.04681	0.7	0.79	8.84e-07	9.786e-06
NOL7	6p23	9.35	9.54	0.980084	0.37	0.49	8.92e-07	9.87e-06
TGFB1I1	16p11.2	9.19	8.72	1.0539	1	0.98	9e-07	9.943e-06
MATN3	2p24.1	8.91	8.18	1.08924	1.52	1.83	9.01e-07	9.943e-06
SLC6A1	3p25.3	4.8	4.26	1.12676	1.13	1.19	9.02e-07	9.943e-06
RANGAP1	22q13.2	10.98	11.27	0.974268	0.63	0.64	9.02e-07	9.943e-06
LMNB1	5q23.2	9.7	10.16	0.954724	0.98	0.97	9.03e-07	9.946e-06
METTL2B	7q32.1	8.13	8.34	0.97482	0.43	0.52	9.18e-07	1.01e-05
PLPPR4	1p21.3-p21.2	6.07	5.42	1.11993	1.42	1.09	9.19e-07	1.011e-05
SLCO2A1	3q22.1-q22.2	9.21	8.72	1.05619	1.02	1.14	9.27e-07	1.018e-05
CLEC1A	12p13.2	5.76	5.25	1.09714	1.09	0.96	9.4e-07	1.031e-05
UACA	15q23	10.72	10.38	1.03276	0.72	0.61	9.4e-07	1.031e-05
ALG3	3q27.1	9.72	9.98	0.973948	0.54	0.66	9.41e-07	1.031e-05
RUNX1	21q22.12	12.08	11.77	1.02634	0.65	0.81	9.42e-07	1.032e-05
BCL7A	12q24.31	8.78	9.05	0.970166	0.56	0.63	9.51e-07	1.041e-05
NOTCH4	6p21.32	8.97	8.56	1.0479	0.88	0.83	9.54e-07	1.043e-05
CMTM3	16q22.1	10.49	10.08	1.04067	0.88	0.82	9.59e-07	1.048e-05
MRM2	7p22.3	9.37	9.54	0.98218	0.35	0.39	9.7e-07	1.059e-05
TRMT61A	14q32.33	8.16	8.52	0.957746	0.77	0.78	9.92e-07	1.081e-05
GEM	8q22.1	9.26	8.67	1.06805	1.25	1.22	9.95e-07	1.084e-05
ENOPH1	4q21.22	9.83	10.04	0.979084	0.42	0.54	1.001e-06	1.089e-05
TLN1	9p13.3	12.99	12.75	1.01882	0.51	0.48	1.003e-06	1.09e-05
FCGR2A	1q23.3	9.99	9.54	1.04717	0.96	0.86	1.005e-06	1.092e-05
ARHGEF25	12q13.3	8.37	8	1.04625	0.79	0.84	1.008e-06	1.094e-05
COL14A1	8q24.12	10.95	10.05	1.08955	1.93	1.76	1.008e-06	1.094e-05
FANCL	2p16.1	8.13	8.41	0.966706	0.59	0.67	1.011e-06	1.096e-05
RNFT2	12q24.22	5.93	6.43	0.92224	1.06	1.13	1.014e-06	1.098e-05
RPS6KA2	6q27	9.76	9.36	1.04274	0.85	0.87	1.017e-06	1.101e-05
ATF6B	6p21.32	11.11	11.28	0.984929	0.34	0.46	1.019e-06	1.101e-05
TMEM2	9q21.13	10.74	10.31	1.04171	0.93	0.86	1.02e-06	1.102e-05
C1RL	12p13.31	10.02	9.78	1.02454	0.48	0.74	1.023e-06	1.104e-05
EXOC2	6p25.3	9.97	10.28	0.969844	0.6	0.95	1.032e-06	1.113e-05
STRN4	19q13.32	10.55	10.75	0.981395	0.41	0.45	1.035e-06	1.115e-05
RAP1B	12q15	11.2	10.98	1.02004	0.47	0.46	1.046e-06	1.126e-05
MOSPD2	Xp22.2	8.22	7.96	1.03266	0.52	0.79	1.05e-06	1.129e-05
ARHGEF16	1p36.32	8.17	8.64	0.945602	1.01	0.85	1.052e-06	1.13e-05
PCOLCE	7q22.1	11.07	10.47	1.05731	1.31	1.07	1.065e-06	1.143e-05
TBCEL	11q23.3	8.53	8.26	1.03269	0.56	0.64	1.073e-06	1.151e-05
TGFB1	19q13.2	10.18	9.81	1.03772	0.77	0.8	1.075e-06	1.152e-05
ALPK3	15q25.3	7.53	7.12	1.05758	0.9	0.84	1.085e-06	1.162e-05
QRICH2	17q25.1	5.55	6.04	0.918874	1.03	1.12	1.086e-06	1.162e-05
LIFR	5p13.1	9.49	8.97	1.05797	1.09	1.28	1.091e-06	1.166e-05
FAM241B	10q22.1	7.36	7.74	0.950904	0.83	0.8	1.091e-06	1.166e-05
PDRG1	20q11.21	8.95	9.25	0.967568	0.63	0.69	1.093e-06	1.166e-05
UQCRH	1p33	10.34	10.6	0.975472	0.53	0.73	1.093e-06	1.166e-05
KLHL20	1q25.1	8.76	8.55	1.02456	0.45	0.54	1.097e-06	1.169e-05
PFDN2	1q23.3	9.44	9.8	0.963265	0.74	0.85	1.1e-06	1.171e-05
PCNX3	11q13.1	10.36	10.57	0.980132	0.44	0.49	1.106e-06	1.176e-05
EGR1	5q31.2	12.03	11.28	1.06649	1.6	1.56	1.11e-06	1.18e-05
FOS	14q24.3	11.96	11.1	1.07748	1.85	1.72	1.111e-06	1.18e-05
E2F8	11p15.1	5.77	6.51	0.886329	1.6	1.55	1.112e-06	1.18e-05
FAM172A	5q15	9.1	8.85	1.02825	0.53	0.64	1.114e-06	1.182e-05
EXO1	1q43	7.02	7.73	0.90815	1.55	1.39	1.129e-06	1.196e-05
CENPO	2p23.3	6.79	7.15	0.94965	0.77	0.79	1.13e-06	1.196e-05
VARS	6p21.33	10.58	10.84	0.976015	0.55	0.58	1.132e-06	1.198e-05
SELENOH	11q12.1	9.82	10.06	0.976143	0.49	0.63	1.133e-06	1.198e-05
ATAT1	6p21.33	7.7	8	0.9625	0.64	0.68	1.138e-06	1.201e-05
BANF1	11q13.1	11.1	11.34	0.978836	0.5	0.63	1.156e-06	1.22e-05
ANK2	4q25-q26	8.1	7.44	1.08871	1.42	1.32	1.161e-06	1.222e-05
ACSS3	12q21.31	8.13	7.44	1.09274	1.45	1.69	1.161e-06	1.222e-05
PDF	16q22.1	7.02	7.31	0.960328	0.61	0.7	1.161e-06	1.222e-05
DKK3	11p15.3	10.34	9.79	1.05618	1.21	1.13	1.163e-06	1.223e-05
STX1B	16p11.2	5.31	4.72	1.125	1.24	1.39	1.168e-06	1.226e-05
MRPL37	1p32.3	10.4	10.61	0.980207	0.43	0.57	1.168e-06	1.226e-05
CENPH	5q13.2	7.23	7.58	0.953826	0.76	0.73	1.192e-06	1.251e-05
TOP2A	17q21.2	10.67	11.28	0.945922	1.3	1.38	1.198e-06	1.256e-05
AHNAK	11q12.3	15.13	14.75	1.02576	0.79	0.98	1.204e-06	1.262e-05
NEK2	1q32.3	8.18	8.79	0.930603	1.32	1.21	1.212e-06	1.268e-05
PIGK	1p31.1	9.96	9.7	1.0268	0.56	0.55	1.216e-06	1.272e-05
WBP1L	10q24.32	11.1	10.85	1.02304	0.52	0.58	1.227e-06	1.282e-05
ACSL4	Xq23	9.75	9.27	1.05178	1.04	0.97	1.229e-06	1.283e-05
TNS3	7p12.3	11.53	11.21	1.02855	0.68	0.76	1.238e-06	1.291e-05
NOV	8q24.12	7.43	6.72	1.10565	1.57	1.31	1.239e-06	1.291e-05
CCNQ	Xq28	8.09	8.32	0.972356	0.48	0.69	1.24e-06	1.291e-05
DISC1	1q42.2	7.13	6.78	1.05162	0.73	0.87	1.243e-06	1.293e-05
PLN	6q22.31	6.42	5.63	1.14032	1.75	1.41	1.248e-06	1.297e-05
ADRA2A	10q25.2	8.8	8.06	1.09181	1.59	1.68	1.25e-06	1.298e-05
RNASEL	1q25.3	8.79	8.51	1.0329	0.58	0.75	1.252e-06	1.299e-05
TMSB4XP8	4q22.1	14.71	14.4	1.02153	0.65	0.83	1.26e-06	1.307e-05
MAGOHB	12p13.2	8.09	8.37	0.966547	0.58	0.66	1.263e-06	1.309e-05
TTF2	1p13.1	8.43	8.72	0.966743	0.6	0.72	1.264e-06	1.309e-05
DOCK11	Xq24	8.65	8.08	1.07054	1.24	1.14	1.288e-06	1.331e-05
FOXK2	17q25.3	10.51	10.75	0.977674	0.49	0.61	1.288e-06	1.331e-05
MTBP	8q24.12	6.69	7.13	0.938289	0.95	1.02	1.293e-06	1.336e-05
TSTA3	8q24.3	10.64	10.99	0.968153	0.73	0.84	1.295e-06	1.337e-05
SPC25	2q24.3	6.41	6.96	0.920977	1.19	1.04	1.302e-06	1.342e-05
LAMC1	1q25.3	12.38	11.97	1.03425	0.9	0.83	1.315e-06	1.355e-05
PLEKHO2	15q22.31	10.04	9.69	1.03612	0.76	0.7	1.327e-06	1.367e-05
ATF2	2q31.1	9.03	8.78	1.02847	0.51	0.8	1.344e-06	1.383e-05
DNAJC11	1p36.31	9.83	10	0.983	0.38	0.39	1.347e-06	1.385e-05
ACOT7	1p36.31	8.71	9.1	0.957143	0.85	0.86	1.362e-06	1.399e-05
PDGFRL	8p22	9.15	8.44	1.08412	1.57	1.23	1.372e-06	1.408e-05
EDNRB	13q22.3	7.85	7.26	1.08127	1.26	1.22	1.373e-06	1.408e-05
ANP32B	9q22.33	11.32	11.53	0.981787	0.43	0.58	1.376e-06	1.41e-05
MYCBP2	13q22.3	10.8	10.48	1.03053	0.69	0.85	1.383e-06	1.416e-05
MIR100HG	11q24.1	7.82	7.23	1.0816	1.3	1.2	1.387e-06	1.419e-05
STRBP	9q33.3	10.07	10.34	0.973888	0.61	0.55	1.388e-06	1.419e-05
AKAP11	13q14.11	10.53	10.25	1.02732	0.59	0.78	1.389e-06	1.419e-05
SNHG15	7p13	7.88	8.18	0.963325	0.64	0.77	1.396e-06	1.425e-05
GATM	15q21.1	9.15	8.58	1.06643	1.21	1.46	1.404e-06	1.431e-05
FARSA	19p13.13	10.13	10.34	0.979691	0.45	0.52	1.414e-06	1.441e-05
CD200	3q13.2	8.13	7.67	1.05997	1	0.9	1.419e-06	1.444e-05
OSTM1	6q21	9.45	9.2	1.02717	0.53	0.54	1.428e-06	1.453e-05
MYADM	19q13.42	12.17	11.85	1.027	0.68	0.73	1.436e-06	1.46e-05
AKAP13	15q25.3	11.58	11.31	1.02387	0.58	0.62	1.439e-06	1.462e-05
BRAT1	7p22.3	9.7	10	0.97	0.65	0.69	1.444e-06	1.465e-05
CHM	Xq21.2	9.22	8.97	1.02787	0.5	0.69	1.446e-06	1.466e-05
LYSMD3	5q14.3	9.31	9.07	1.02646	0.5	0.64	1.448e-06	1.466e-05
ARHGAP31	3q13.32-q13.33	9.64	9.22	1.04555	0.93	0.8	1.448e-06	1.466e-05
FAF1	1p32.3	9.64	9.83	0.980671	0.4	0.48	1.449e-06	1.466e-05
MBNL2	13q32.1	10.58	10.23	1.03421	0.74	0.91	1.465e-06	1.481e-05
YKT6	7p13	10.98	11.17	0.98299	0.4	0.47	1.47e-06	1.485e-05
FYCO1	3p21.31	10.59	10.29	1.02915	0.62	0.75	1.476e-06	1.489e-05
HMCES	3q21.3	9.78	9.98	0.97996	0.43	0.48	1.48e-06	1.492e-05
PI4K2A	10q24.2	9.94	9.77	1.0174	0.37	0.38	1.49e-06	1.501e-05
EID1	15q21.1	11.7	11.45	1.02183	0.53	0.68	1.503e-06	1.513e-05
CRCP	7q11.21	9.94	10.11	0.983185	0.36	0.4	1.508e-06	1.517e-05
DDIAS	11q14.1	6.77	7.26	0.932507	1.06	1.06	1.509e-06	1.517e-05
RNPS1	16p13.3	11.39	11.59	0.982744	0.43	0.49	1.514e-06	1.52e-05
TNFSF12	17p13.1	9.06	8.75	1.03543	0.68	0.74	1.515e-06	1.52e-05
GPC6	13q31.3-q32.1	8.52	7.69	1.10793	1.83	1.57	1.53e-06	1.534e-05
SNX30	9q32	9.57	9.32	1.02682	0.52	0.67	1.547e-06	1.551e-05
GNL2	1p34.3	10.47	10.65	0.983099	0.37	0.51	1.571e-06	1.573e-05
GLIS3	9p24.2	7.55	6.89	1.09579	1.46	1.3	1.585e-06	1.586e-05
REEP4	8p21.3	8.63	8.96	0.96317	0.7	0.77	1.586e-06	1.586e-05
LSM2	6p21.33	9.27	9.49	0.976818	0.46	0.64	1.593e-06	1.592e-05
MRPL58	17q25.1	8.62	8.87	0.971815	0.53	0.68	1.598e-06	1.595e-05
PICALM	11q14.2	11.94	11.72	1.01877	0.48	0.51	1.599e-06	1.595e-05
TBC1D2B	15q24.3-q25.1	10.46	10.17	1.02852	0.62	0.58	1.603e-06	1.597e-05
MTMR9	8p23.1	8.66	8.41	1.02973	0.54	0.64	1.604e-06	1.597e-05
SGO2	2q33.1	7.66	8.05	0.951553	0.85	0.81	1.607e-06	1.599e-05
STOM	9q33.2	12.61	12.2	1.03361	0.89	0.92	1.621e-06	1.612e-05
ARHGAP18	6q22.33	9.6	9.31	1.03115	0.62	0.66	1.625e-06	1.615e-05
CTSK	1q21.3	12.15	11.52	1.05469	1.4	1.31	1.632e-06	1.62e-05
NEK9	14q24.3	10.98	10.78	1.01855	0.42	0.56	1.643e-06	1.629e-05
ST6GALNAC3	1p31.1	5.52	5.03	1.09742	1.07	1.03	1.644e-06	1.629e-05
TRIM11	1q42.13	9.33	9.6	0.971875	0.59	0.63	1.645e-06	1.63e-05
ASNS	7q21.3	8.73	9.17	0.952017	0.96	1.02	1.648e-06	1.631e-05
HEXA	15q23	11.12	10.92	1.01832	0.42	0.52	1.65e-06	1.632e-05
PTGER3	1p31.1	9.2	8.4	1.09524	1.68	2.09	1.655e-06	1.635e-05
TACO1	17q23.3	8.64	8.87	0.97407	0.49	0.67	1.662e-06	1.642e-05
CCDC137	17q25.3	8.56	8.89	0.96288	0.72	0.78	1.664e-06	1.642e-05
CD248	11q13.2	10.04	9.53	1.05352	1.14	0.96	1.679e-06	1.656e-05
SAMD8	10q22.2	7.01	6.69	1.04783	0.66	0.89	1.682e-06	1.657e-05
MICAL2	11p15.3	11.33	10.92	1.03755	0.9	0.88	1.707e-06	1.679e-05
MAT2B	5q34	10.57	10.37	1.01929	0.41	0.49	1.707e-06	1.679e-05
CERCAM	9q34.11	10.94	10.5	1.0419	0.96	0.89	1.726e-06	1.696e-05
ACTR5	20q11.23	7.73	7.92	0.97601	0.41	0.51	1.735e-06	1.704e-05
RTL5	Xq13.1	7.69	7.22	1.0651	1	1.21	1.758e-06	1.725e-05
SELENOP	5p12	12.55	12.08	1.03891	0.99	1.26	1.762e-06	1.728e-05
UCK2	1q24.1	8.67	8.98	0.965479	0.66	0.78	1.785e-06	1.749e-05
NEIL3	4q34.3	4.96	5.65	0.877876	1.52	1.42	1.796e-06	1.758e-05
ZNF436	1p36.12	10.04	9.79	1.02554	0.55	0.61	1.81e-06	1.77e-05
SLC7A8	14q11.2	11.44	10.89	1.05051	1.13	1.62	1.811e-06	1.77e-05
COL5A3	19p13.2	9.92	9.33	1.06324	1.31	1.25	1.813e-06	1.771e-05
C16ORF45	16p13.11	9.03	8.36	1.08014	1.44	1.63	1.823e-06	1.779e-05
PTTG1	5q33.3	7.93	8.5	0.932941	1.25	1.23	1.844e-06	1.799e-05
SDCCAG3	9q34.3	9.02	9.2	0.980435	0.38	0.49	1.856e-06	1.809e-05
GNS	12q14.3	12.54	12.28	1.02117	0.58	0.59	1.866e-06	1.817e-05
ANAPC7	12q24.11	10.04	10.22	0.982387	0.4	0.4	1.868e-06	1.817e-05
SSU72	1p36.33	11.05	11.24	0.983096	0.4	0.52	1.874e-06	1.822e-05
ERCC3	2q14.3	9.89	10.02	0.987026	0.27	0.36	1.887e-06	1.833e-05
PRKN	6q26	5.35	4.85	1.10309	1.08	1.26	1.897e-06	1.842e-05
DPYSL3	5q32	11.95	11.35	1.05286	1.35	1.1	1.904e-06	1.847e-05
STXBP5	6q24.3	8.9	8.52	1.0446	0.83	0.82	1.913e-06	1.855e-05
WISP2	20q13.12	8.73	7.78	1.12211	2.11	1.9	1.924e-06	1.864e-05
CCDC18	1p22.1	5.74	6.15	0.933333	0.88	1	1.94e-06	1.877e-05
EIPR1	2p25.3	8.65	8.85	0.977401	0.45	0.48	1.941e-06	1.877e-05
KCNJ8	12p12.1	7.95	7.45	1.06711	1.1	0.96	1.947e-06	1.882e-05
PAK4	19q13.2	10.55	10.82	0.975046	0.58	0.68	1.949e-06	1.883e-05
SYDE1	19p13.12	8.22	7.79	1.0552	0.95	0.83	1.952e-06	1.884e-05
WNT5A	3p14.3	9.04	8.38	1.07876	1.42	1.55	1.955e-06	1.885e-05
DONSON	21q22.11	7.85	8.19	0.958486	0.74	0.83	1.957e-06	1.886e-05
DUS2	16q22.1	7.36	7.61	0.967148	0.53	0.62	1.965e-06	1.89e-05
HOXD8	2q31.1	7.43	6.91	1.07525	1.09	1.38	1.965e-06	1.89e-05
KAT2A	17q21.2	9.53	9.85	0.967513	0.71	0.76	1.967e-06	1.89e-05
ECSCR	5q31.2	6.38	5.89	1.08319	1.08	1.03	1.967e-06	1.89e-05
TDP1	14q32.11	8.72	8.92	0.977578	0.44	0.47	1.982e-06	1.903e-05
TRAM2	6p12.2	10.42	10.11	1.03066	0.7	0.62	1.988e-06	1.907e-05
PUF60	8q24.3	11.34	11.63	0.975064	0.64	0.73	2.015e-06	1.932e-05
PXDN	2p25.3	12.11	11.6	1.04397	1.11	1.06	2.026e-06	1.941e-05
ENTPD6	20p11.21	10.52	10.81	0.973173	0.63	0.59	2.032e-06	1.945e-05
BRIX1	5p13.2	9.4	9.61	0.978148	0.45	0.58	2.034e-06	1.945e-05
LAGE3	Xq28	8.74	9.09	0.961496	0.75	0.91	2.043e-06	1.953e-05
GADD45B	19p13.3	10.25	9.83	1.04273	0.93	0.94	2.051e-06	1.958e-05
TYMS	18p11.32	8.7	9.19	0.946681	1.07	1.08	2.055e-06	1.961e-05
MVD	16q24.2	8.08	8.5	0.950588	0.92	1.03	2.058e-06	1.962e-05
EMC8	16q24.1	8.54	8.74	0.977117	0.44	0.56	2.065e-06	1.968e-05
IL17RB	3p21.1	7.51	8.12	0.924877	1.33	1.25	2.069e-06	1.97e-05
FAP	2q24.2	10.35	9.71	1.06591	1.42	1.31	2.071e-06	1.97e-05
LRRC47	1p36.32	10	10.16	0.984252	0.34	0.41	2.099e-06	1.995e-05
TRIM28	19q13.43	12.29	12.52	0.981629	0.49	0.55	2.111e-06	2.006e-05
TEX30	13q33.1	6.99	7.3	0.957534	0.65	0.81	2.119e-06	2.012e-05
BAG6	6p21.33	11.9	12.07	0.985915	0.36	0.41	2.122e-06	2.013e-05
CDC14B	9q22.32-q22.33	7.94	7.51	1.05726	0.94	0.98	2.133e-06	2.022e-05
RNF111	15q22.1-q22.2	9.52	9.32	1.02146	0.41	0.59	2.141e-06	2.028e-05
ZNF484	9q22.31	6.62	6.31	1.04913	0.64	0.86	2.146e-06	2.031e-05
CELF2	10p14	9.17	8.68	1.05645	1.08	1.13	2.151e-06	2.035e-05
AZI2	3p24.1	9.98	9.83	1.01526	0.32	0.4	2.162e-06	2.043e-05
KDM1A	1p36.12	10.78	10.96	0.983577	0.4	0.47	2.18e-06	2.059e-05
CENPF	1q41	10.42	10.95	0.951598	1.17	1.21	2.193e-06	2.069e-05
MARVELD3	16q22.2	8.01	8.47	0.945691	1.06	0.75	2.202e-06	2.076e-05
ADRM1	20q13.33	10.44	10.75	0.971163	0.68	0.74	2.205e-06	2.077e-05
CD3EAP	19q13.32	8.74	8.95	0.976536	0.46	0.54	2.206e-06	2.077e-05
THSD1	13q14.3	6.93	6.5	1.06615	0.95	0.86	2.218e-06	2.087e-05
SNAI2	8q11.21	8.91	8.4	1.06071	1.14	1.07	2.224e-06	2.091e-05
FAM72D	1q21.1	5.2	5.79	0.8981	1.3	1.38	2.225e-06	2.091e-05
MAD2L1	4q27	8.09	8.58	0.94289	1.11	1.01	2.227e-06	2.091e-05
TIMM50	19q13.2	9.42	9.61	0.980229	0.41	0.6	2.232e-06	2.094e-05
PRIM2	6p11.2	7.48	7.75	0.965161	0.59	0.66	2.283e-06	2.14e-05
WDR77	1p13.2	9.3	9.51	0.977918	0.44	0.54	2.285e-06	2.141e-05
LIMS2	2q14.3	8.53	8.06	1.05831	1.06	1.01	2.313e-06	2.165e-05
TMPO	12q23.1	10.35	10.66	0.970919	0.69	0.71	2.314e-06	2.165e-05
C7ORF26	7p22.1	8.92	9.1	0.98022	0.38	0.45	2.33e-06	2.176e-05
ZNF696	8q24.3	7.7	7.99	0.963705	0.65	0.7	2.33e-06	2.176e-05
PLXNA3	Xq28	9.95	10.25	0.970732	0.65	0.68	2.344e-06	2.188e-05
PLXNA4	7q32.3	7.48	6.68	1.11976	1.79	1.55	2.352e-06	2.194e-05
KCTD10	12q24.11	10.75	10.55	1.01896	0.46	0.39	2.355e-06	2.195e-05
JMJD1C	10q21.3	10.61	10.37	1.02314	0.52	0.7	2.361e-06	2.199e-05
KLHDC1	14q21.3	5.84	5.43	1.07551	0.87	1.16	2.364e-06	2.2e-05
PNPT1	2p16.1	9.31	9.53	0.976915	0.47	0.58	2.367e-06	2.202e-05
C20ORF194	20p13	8.86	8.6	1.03023	0.58	0.67	2.375e-06	2.207e-05
C2ORF68	2p11.2	9.55	9.7	0.984536	0.33	0.44	2.377e-06	2.207e-05
PARS2	1p32.3	7.11	7.32	0.971311	0.46	0.52	2.395e-06	2.223e-05
METTL13	1q24.3	10.02	10.22	0.980431	0.43	0.5	2.406e-06	2.231e-05
ADAMTS6	5q12.3	6.18	5.59	1.10555	1.33	1.13	2.409e-06	2.232e-05
ALKBH2	12q24.11	7.95	8.21	0.968331	0.59	0.64	2.413e-06	2.235e-05
MORC2-AS1	22q12.2	6.77	7.03	0.963016	0.56	0.68	2.416e-06	2.235e-05
SCML2	Xp22.13	4.9	5.63	0.870337	1.64	1.55	2.431e-06	2.248e-05
GNAI2	3p21.31	12.7	12.49	1.01681	0.46	0.48	2.445e-06	2.259e-05
HNRNPAB	5q35.3	11.59	11.8	0.982203	0.45	0.53	2.456e-06	2.267e-05
RGL1	1q25.3	9.08	8.65	1.04971	0.96	0.88	2.476e-06	2.284e-05
ZNF232	17p13.2	7.16	7.45	0.961074	0.63	0.68	2.478e-06	2.284e-05
FAM13A	4q22.1	8.74	8.39	1.04172	0.75	0.9	2.482e-06	2.287e-05
DTX2	7q11.23	8.62	8.9	0.968539	0.59	0.75	2.485e-06	2.288e-05
STEAP2	7q21.13	9.3	8.68	1.07143	1.34	1.7	2.496e-06	2.296e-05
MEA1	6p21.1	10.08	10.3	0.978641	0.47	0.58	2.514e-06	2.311e-05
MECOM	3q26.2	8.03	7.56	1.06217	1.03	1.03	2.52e-06	2.315e-05
SH3PXD2A	10q24.33	11.33	10.91	1.0385	0.95	0.79	2.524e-06	2.317e-05
PRELID3A	18p11.21	5.42	5.8	0.934483	0.82	1.05	2.527e-06	2.318e-05
EIF2B5	3q27.1	10.25	10.43	0.982742	0.4	0.37	2.536e-06	2.324e-05
USP42	7p22.1	8.61	8.77	0.981756	0.35	0.45	2.538e-06	2.324e-05
GOLIM4	3q26.2	9.67	9.26	1.04428	0.88	1.03	2.539e-06	2.324e-05
PECAM1	17q23.3	10.26	9.85	1.04162	0.93	0.79	2.548e-06	2.331e-05
TGOLN2	2p11.2	12.77	12.56	1.01672	0.43	0.57	2.555e-06	2.336e-05
COQ9	16q21	9.35	9.57	0.977011	0.47	0.58	2.579e-06	2.355e-05
CARD6	5p13.1	7.65	7.22	1.05956	0.96	0.91	2.584e-06	2.358e-05
TPT1	13q14.13	15.59	15.31	1.01829	0.6	0.65	2.61e-06	2.38e-05
SOCS5	2p21	9.67	9.4	1.02872	0.6	0.57	2.629e-06	2.396e-05
MAOB	Xp11.3	10.51	9.3	1.13011	2.72	2.38	2.631e-06	2.396e-05
KANSL2	12q13.11	9.05	9.19	0.984766	0.3	0.37	2.637e-06	2.4e-05
SRSF1	17q22	12.17	12.32	0.987825	0.32	0.33	2.65e-06	2.41e-05
TRERF1	6p21.1	9.26	8.86	1.04515	0.84	1.23	2.659e-06	2.417e-05
ATP8B2	1q21.3	9.84	9.42	1.04459	0.92	0.95	2.662e-06	2.417e-05
KIF20A	5q31.2	8.35	8.93	0.93505	1.28	1.31	2.664e-06	2.417e-05
DPYSL2	8p21.2	10.89	10.53	1.03419	0.8	0.85	2.665e-06	2.417e-05
TMEM204	16p13.3	8.31	7.89	1.05323	0.93	0.97	2.675e-06	2.424e-05
CDC34	19p13.3	9.09	9.41	0.965994	0.7	0.73	2.678e-06	2.425e-05
SURF2	9q34.2	7.47	7.82	0.955243	0.78	0.79	2.68e-06	2.426e-05
KIF18A	11p14.1	6.62	7.19	0.920723	1.28	1.19	2.686e-06	2.429e-05
DPH7	9q34.3	7.94	8.19	0.969475	0.55	0.61	2.703e-06	2.443e-05
POLR2G	11q12.3	9.95	10.13	0.982231	0.4	0.51	2.713e-06	2.449e-05
HRH1	3p25.3	7.52	7.03	1.0697	1.12	0.95	2.73e-06	2.463e-05
SFXN3	10q24.31	10.18	9.91	1.02725	0.6	0.64	2.767e-06	2.495e-05
NUP210	3p25.1	10.89	11.27	0.966282	0.86	0.8	2.773e-06	2.499e-05
CHEK1	11q24.2	7.32	7.73	0.94696	0.91	0.95	2.782e-06	2.505e-05
ZNF365	10q21.2	6.39	5.8	1.10172	1.31	1.38	2.786e-06	2.507e-05
NCBP2-AS2	3q29	7.84	8.1	0.967901	0.56	0.68	2.804e-06	2.522e-05
PPP1R14B	11q13.1	10	10.34	0.967118	0.72	0.94	2.81e-06	2.525e-05
WDR53	3q29	7.28	7.49	0.971963	0.46	0.5	2.815e-06	2.528e-05
TMEM30A	6q14.1	12.12	11.89	1.01934	0.49	0.54	2.824e-06	2.533e-05
RP2	Xp11.3	8.92	8.7	1.02529	0.47	0.63	2.826e-06	2.533e-05
TAF11	6p21.31	9.19	9.42	0.975584	0.5	0.53	2.827e-06	2.533e-05
CYR61	1p22.3	11.9	11.27	1.0559	1.42	1.29	2.836e-06	2.54e-05
MKI67	10q26.2	10.21	10.76	0.948885	1.22	1.29	2.84e-06	2.541e-05
ITGB1	10p11.22	13.8	13.5	1.02222	0.68	0.57	2.849e-06	2.547e-05
C1ORF131	1q42.2	8.13	8.35	0.973653	0.49	0.54	2.852e-06	2.547e-05
CEP85	1p36.11	8.56	8.86	0.96614	0.66	0.65	2.852e-06	2.547e-05
MTERF3	8q22.1	8.56	8.87	0.965051	0.69	0.75	2.858e-06	2.55e-05
PIK3R1	5q13.1	11.54	11.15	1.03498	0.85	1.04	2.876e-06	2.565e-05
LPCAT2	16q12.2	8.94	8.52	1.0493	0.92	0.96	2.882e-06	2.568e-05
EGLN3	14q13.1	9.81	9.09	1.07921	1.63	1.45	2.89e-06	2.573e-05
JAK1	1p31.3	12.19	11.93	1.02179	0.56	0.59	2.891e-06	2.573e-05
PPTC7	12q24.11	8.64	8.33	1.03721	0.63	0.98	2.92e-06	2.596e-05
CHSY1	15q26.3	10.88	10.59	1.02738	0.64	0.68	2.923e-06	2.597e-05
CORO1B	11q13.2	10.73	11.02	0.973684	0.63	0.75	2.936e-06	2.607e-05
CRY2	11p11.2	10.06	9.78	1.02863	0.61	0.68	2.939e-06	2.608e-05
YTHDF1	20q13.33	10.55	10.73	0.983225	0.38	0.45	2.945e-06	2.612e-05
TMEM63B	6p21.1	10.29	10.53	0.977208	0.54	0.59	2.96e-06	2.623e-05
KIAA1217	10p12.2-p12.1	11.77	11.5	1.02348	0.6	0.65	2.972e-06	2.631e-05
LIMS3-LOC440895	2q13	4.1	3.66	1.12022	0.98	1.02	2.974e-06	2.631e-05
APRT	16q24.3	10.24	10.52	0.973384	0.6	0.76	2.975e-06	2.631e-05
AP1S1	7q22.1	9.72	9.98	0.973948	0.57	0.6	2.993e-06	2.645e-05
SCN4B	11q23.3	7.41	6.77	1.09453	1.44	1.39	3.005e-06	2.653e-05
ZNF574	19q13.2	8.92	9.11	0.979144	0.42	0.47	3.01e-06	2.656e-05
DLGAP5	14q22.3	7.55	8.15	0.92638	1.35	1.3	3.018e-06	2.662e-05
TCOF1	5q32-q33.1	9.96	10.21	0.975514	0.56	0.58	3.022e-06	2.663e-05
AASS	7q31.32	7.75	7.3	1.06164	0.99	1.07	3.067e-06	2.7e-05
SLC2A4RG	20q13.33	10.25	10.55	0.971564	0.66	0.82	3.068e-06	2.7e-05
ZC3H3	8q24.3	9.09	9.36	0.971154	0.6	0.67	3.071e-06	2.701e-05
TRANK1	3p22.2	9.68	9.37	1.03308	0.65	0.88	3.094e-06	2.719e-05
PDE2A	11q13.4	7.34	6.72	1.09226	1.41	1.23	3.102e-06	2.724e-05
ABCC3	17q21.33	8.88	8.24	1.07767	1.41	1.55	3.123e-06	2.741e-05
PARP8	5q11.1	8.28	7.78	1.06427	1.11	1.24	3.126e-06	2.742e-05
ZWILCH	15q22.31	8.59	8.83	0.97282	0.53	0.62	3.132e-06	2.745e-05
TFPI	2q32.1	8.6	7.99	1.07635	1.37	1.19	3.162e-06	2.769e-05
HACD4	9p21.3	8.87	8.34	1.06355	1.2	1.17	3.187e-06	2.789e-05
FBXL5	4p15.32	11.37	11.15	1.01973	0.48	0.63	3.198e-06	2.797e-05
UQCC2	6p21.31	9.62	9.87	0.974671	0.56	0.69	3.21e-06	2.806e-05
GSK3A	19q13.2	10.63	10.78	0.986085	0.33	0.39	3.219e-06	2.812e-05
DENR	12q24.31	10.61	10.8	0.982407	0.42	0.43	3.237e-06	2.825e-05
CEP95	17q23.3	8.73	9.02	0.967849	0.65	0.64	3.248e-06	2.833e-05
LIMS1	2q12.3	8.62	8.25	1.04485	0.81	1.02	3.26e-06	2.841e-05
HSPA14	10p13	9.08	9.28	0.978448	0.43	0.58	3.274e-06	2.851e-05
AIMP2	7p22.1	8.67	8.85	0.979661	0.39	0.52	3.276e-06	2.851e-05
ETV1	7p21.2	8.15	7.58	1.0752	1.29	1.13	3.284e-06	2.856e-05
EEA1	12q22	9.73	9.45	1.02963	0.62	0.72	3.295e-06	2.864e-05
MRPS9	2q12.1	8.83	9	0.981111	0.37	0.52	3.303e-06	2.869e-05
KATNAL1	13q12.3	8.59	8.32	1.03245	0.59	0.69	3.306e-06	2.87e-05
CTPS1	1p34.2	9.02	9.36	0.963675	0.75	0.85	3.316e-06	2.876e-05
TNIK	3q26.2-q26.31	8.37	7.72	1.0842	1.43	1.69	3.336e-06	2.892e-05
MRPL38	17q25.1	9.57	9.83	0.97355	0.57	0.7	3.339e-06	2.892e-05
PPM1M	3p21.2	8.89	8.66	1.02656	0.51	0.61	3.35e-06	2.9e-05
TMEM200B	1p35.3	6.73	6.1	1.10328	1.41	1.53	3.365e-06	2.911e-05
ZNF597	16p13.3	6.08	5.72	1.06294	0.74	1.19	3.372e-06	2.913e-05
KMT5A	12q24.31	9.48	9.7	0.97732	0.49	0.48	3.372e-06	2.913e-05
PABPN1	14q11.2	10.96	11.17	0.9812	0.47	0.54	3.397e-06	2.933e-05
CCNA2	4q27	8.13	8.7	0.934483	1.29	1.22	3.408e-06	2.94e-05
MRPS25	3p25.1	9.24	9.46	0.976744	0.49	0.59	3.419e-06	2.948e-05
HECTD2	10q23.32	8.61	8.23	1.04617	0.85	0.95	3.432e-06	2.957e-05
NUSAP1	15q15.1	9.14	9.63	0.949117	1.1	1.08	3.458e-06	2.977e-05
ADAMTS12	5p13.3-p13.2	8.37	7.62	1.09843	1.69	1.67	3.469e-06	2.985e-05
INHBA	7p14.1	8.65	7.97	1.08532	1.53	1.49	3.485e-06	2.995e-05
A2M	12p13.31	13.86	13.41	1.03356	1.03	0.97	3.485e-06	2.995e-05
SERPINE1	7q22.1	10.6	9.95	1.06533	1.51	1.28	3.491e-06	2.998e-05
SIDT2	11q23.3	10.3	10.08	1.02183	0.48	0.63	3.503e-06	3.004e-05
ACOX2	3p14.3	8.14	7.32	1.11202	1.79	2.25	3.504e-06	3.004e-05
TESMIN	11q13.3	8.45	9.06	0.932671	1.4	1.12	3.506e-06	3.004e-05
GHR	5p13.1-p12	8.37	7.76	1.07861	1.33	1.54	3.513e-06	3.009e-05
POSTN	13q13.3	14.58	13.84	1.05347	1.67	1.55	3.562e-06	3.049e-05
ARHGAP42	11q22.1	6.97	6.53	1.06738	0.97	1.17	3.574e-06	3.057e-05
MAPKAPK5	12q24.12-q24.13	8.99	9.15	0.982514	0.36	0.4	3.628e-06	3.101e-05
PYGO2	1q21.3	10.84	11.04	0.981884	0.46	0.46	3.65e-06	3.117e-05
CYP2U1	4q25	7.83	7.46	1.0496	0.86	0.78	3.683e-06	3.144e-05
AEBP1	7p13	13.94	13.33	1.04576	1.39	1.27	3.688e-06	3.146e-05
LMOD1	1q32.1	8.99	8.39	1.07151	1.38	1.28	3.699e-06	3.153e-05
CBX2	17q25.3	7.32	8.02	0.912718	1.53	1.88	3.718e-06	3.167e-05
ACVRL1	12q13.13	9	8.62	1.04408	0.85	0.74	3.746e-06	3.189e-05
KIF13A	6p22.3	10.28	9.95	1.03317	0.73	0.9	3.765e-06	3.203e-05
SAFB	19p13.3	10.58	10.77	0.982358	0.45	0.43	3.774e-06	3.208e-05
SAYSD1	6p21.2	9.57	9.81	0.975535	0.53	0.57	3.793e-06	3.222e-05
COMTD1	10q22.2	6.5	6.99	0.9299	1.09	1.2	3.816e-06	3.24e-05
ZNF512B	20q13.33	9.52	9.8	0.971429	0.61	0.63	3.828e-06	3.248e-05
NEDD9	6p24.2	10.33	9.82	1.05193	1.16	1.09	3.846e-06	3.261e-05
TMBIM1	2q35	11.53	11.29	1.02126	0.53	0.61	3.852e-06	3.264e-05
SERPINB8	18q22.1	7.86	7.53	1.04382	0.73	0.81	3.876e-06	3.281e-05
ADAMTS9	3p14.1	8.44	7.87	1.07243	1.3	1.11	3.877e-06	3.281e-05
APBB1	11p15.4	8.95	8.58	1.04312	0.83	1.01	3.919e-06	3.314e-05
MRGBP	20q13.33	8.44	8.69	0.971231	0.55	0.65	3.938e-06	3.328e-05
ARHGAP28	18p11.31	7.32	6.61	1.10741	1.65	1.32	3.945e-06	3.332e-05
MTCH1	6p21.2	11.61	11.78	0.985569	0.38	0.5	3.948e-06	3.332e-05
TRIM9	14q22.1	5.81	5.05	1.1505	1.73	1.71	3.968e-06	3.347e-05
SMPD1	11p15.4	9.66	9.41	1.02657	0.56	0.64	3.983e-06	3.357e-05
APOO	Xp22.11	8.07	8.31	0.971119	0.53	0.64	4.04e-06	3.403e-05
P4HA3	11q13.4	7.67	7.04	1.08949	1.43	1.39	4.087e-06	3.44e-05
GINS4	8p11.21	7.12	7.65	0.930719	1.22	1.19	4.092e-06	3.442e-05
FDPS	1q22	10.88	11.13	0.977538	0.55	0.62	4.103e-06	3.449e-05
FOXP4	6p21.1	10.72	11.01	0.97366	0.65	0.77	4.122e-06	3.462e-05
ANKZF1	2q35	8.93	9.15	0.975956	0.5	0.53	4.124e-06	3.462e-05
CFI	4q25	8.4	7.84	1.07143	1.27	1.17	4.139e-06	3.472e-05
ZC3H18	16q24.2	9.3	9.51	0.977918	0.45	0.58	4.157e-06	3.484e-05
TPST1	7q11.21	8.09	7.68	1.05339	0.94	0.83	4.158e-06	3.484e-05
FUK	16q22.1	8.2	8.49	0.965842	0.64	0.67	4.16e-06	3.484e-05
SPSB2	12p13.31	6.71	7.03	0.954481	0.71	0.92	4.207e-06	3.52e-05
DAXX	6p21.32	10.69	10.87	0.983441	0.41	0.44	4.211e-06	3.522e-05
SFXN4	10q26.11	8.52	8.74	0.974828	0.49	0.56	4.223e-06	3.529e-05
AP1S2	Xp22.2	8.67	8.35	1.03832	0.72	0.66	4.228e-06	3.531e-05
SLC25A19	17q25.1	7.69	7.97	0.964868	0.61	0.8	4.23e-06	3.531e-05
IL1RAP	3q28	7.71	7.26	1.06198	1.02	0.97	4.234e-06	3.531e-05
ZBTB12	6p21.33	6.93	7.26	0.954545	0.75	0.79	4.276e-06	3.565e-05
SLC44A1	9q31.1-q31.2	11.94	11.66	1.02401	0.64	0.64	4.295e-06	3.576e-05
PURA	5q31.3	8.41	8.21	1.02436	0.44	0.58	4.296e-06	3.576e-05
SMS	Xp22.11	10.88	11.13	0.977538	0.54	0.68	4.324e-06	3.597e-05
ATG4B	2q37.3	9.49	9.7	0.978351	0.49	0.51	4.411e-06	3.667e-05
WIPI2	7p22.1	10.53	10.68	0.985955	0.32	0.41	4.424e-06	3.676e-05
WIPF1	2q31.1	10.48	10.06	1.04175	0.98	0.94	4.462e-06	3.705e-05
ZNF815P	7p22.1	4.75	5.05	0.940594	0.67	0.75	4.468e-06	3.707e-05
POLR2M	15q21.3	9.82	9.64	1.01867	0.41	0.51	4.522e-06	3.748e-05
ABCF1	6p21.33	10.65	10.83	0.98338	0.41	0.47	4.523e-06	3.748e-05
GPS1	17q25.3	10.66	10.91	0.977085	0.55	0.63	4.538e-06	3.758e-05
SUPT5H	19q13.2	11.3	11.48	0.984321	0.41	0.53	4.547e-06	3.763e-05
PPP3CC	8p21.3	8.17	7.93	1.03026	0.52	0.69	4.569e-06	3.777e-05
KNOP1	16p12.3	9.16	9.39	0.975506	0.53	0.54	4.57e-06	3.777e-05
LACC1	13q14.11	8.11	7.78	1.04242	0.74	0.77	4.585e-06	3.787e-05
SSFA2	2q31.3	11.57	11.02	1.04991	1.27	1.19	4.588e-06	3.787e-05
ZFPL1	11q13.1	8.96	9.18	0.976035	0.47	0.61	4.601e-06	3.795e-05
CYC1	8q24.3	10.84	11.13	0.973944	0.65	0.77	4.63e-06	3.817e-05
SIAE	11q24.2	9.73	9.38	1.03731	0.76	0.97	4.66e-06	3.836e-05
PTENP1	9p13.3	8.24	7.96	1.03518	0.63	0.73	4.66e-06	3.836e-05
REXO5	16p12.3	6.91	7.3	0.946575	0.9	0.83	4.722e-06	3.885e-05
CBX8	17q25.3	6.95	7.29	0.953361	0.78	0.83	4.73e-06	3.889e-05
HMGN2	1p36.11	12.43	12.63	0.984165	0.44	0.52	4.74e-06	3.895e-05
PCLAF	15q22.31	7.73	8.24	0.938107	1.16	1.09	4.81e-06	3.95e-05
PALLD	4q32.3	12.43	12.01	1.03497	0.98	0.89	4.815e-06	3.952e-05
DOT1L	19p13.3	8.89	9.18	0.96841	0.65	0.62	4.822e-06	3.954e-05
H6PD	1p36.22	11.16	10.9	1.02385	0.6	0.65	4.838e-06	3.966e-05
PDZRN3	3p13	9.24	8.78	1.05239	1.04	1.12	4.855e-06	3.977e-05
PLXDC1	17q12	9.25	8.83	1.04757	0.96	0.89	4.866e-06	3.983e-05
TMUB1	7q36.1	8.75	9.06	0.965784	0.68	0.8	4.871e-06	3.985e-05
XPO5	6p21.1	10.27	10.51	0.977165	0.54	0.67	4.95e-06	4.042e-05
TPP1	11p15.4	12.02	11.81	1.01778	0.46	0.53	4.95e-06	4.042e-05
CHCHD3	7q32.3-q33	9.64	9.81	0.982671	0.37	0.48	4.952e-06	4.042e-05
ESD	13q14.2	10.67	10.47	1.0191	0.44	0.5	4.953e-06	4.042e-05
TGFBR3	1p22.1	9.76	9.06	1.07726	1.59	1.72	4.99e-06	4.069e-05
ITGA11	15q23	10.52	9.81	1.07238	1.66	1.54	5.038e-06	4.106e-05
RRP12	10q24.1	9.75	9.98	0.976954	0.53	0.52	5.041e-06	4.106e-05
ERI3	1p34.1	9.76	9.95	0.980905	0.41	0.52	5.05e-06	4.11e-05
LEMD2	6p21.31	9.67	9.86	0.98073	0.43	0.5	5.057e-06	4.113e-05
TIPIN	15q22.31	6.55	6.8	0.963235	0.55	0.65	5.098e-06	4.144e-05
PIP4P2	8q21.3	7.52	7.15	1.05175	0.84	0.97	5.109e-06	4.15e-05
USP53	4q26	9.71	9.4	1.03298	0.68	0.88	5.178e-06	4.204e-05
TMEM223	11q12.3	7.99	8.22	0.972019	0.51	0.64	5.2e-06	4.219e-05
CTBS	1p22.3	9.22	8.97	1.02787	0.57	0.63	5.226e-06	4.237e-05
HFE	6p22.2	7.64	7.24	1.05525	0.87	1.13	5.231e-06	4.238e-05
ANGPT1	8q23.1	6.28	5.61	1.11943	1.56	1.38	5.239e-06	4.24e-05
SSSCA1	11q13.1	8.16	8.4	0.971429	0.52	0.67	5.239e-06	4.24e-05
NEXN	1p31.1	8.02	7.49	1.07076	1.25	1.05	5.242e-06	4.24e-05
CHST14	15q15.1	9.29	9.06	1.02539	0.53	0.5	5.286e-06	4.272e-05
USP39	2p11.2	10.27	10.41	0.986551	0.3	0.42	5.343e-06	4.316e-05
CCT6A	7p11.2	11.97	12.19	0.981952	0.5	0.57	5.368e-06	4.332e-05
AHCY	20q11.22	11.76	12.01	0.979184	0.56	0.63	5.37e-06	4.332e-05
FBXL17	5q21.3	9.35	9.1	1.02747	0.55	0.74	5.395e-06	4.349e-05
TNFRSF1A	12p13.31	11.28	11.08	1.01805	0.43	0.5	5.408e-06	4.357e-05
ATF7	12q13.13	10.65	10.47	1.01719	0.39	0.5	5.415e-06	4.36e-05
DTL	1q32.3	8.51	9.03	0.942414	1.2	1.11	5.462e-06	4.395e-05
PRRX1	1q24.2	11.15	10.52	1.05989	1.48	1.14	5.502e-06	4.424e-05
GIT1	17q11.2	10.43	10.66	0.978424	0.52	0.64	5.523e-06	4.439e-05
NELFB	9q34.3	10.28	10.47	0.981853	0.42	0.5	5.535e-06	4.445e-05
TIMM17B	Xp11.23	9.24	9.5	0.972632	0.6	0.67	5.544e-06	4.45e-05
VPS37C	11q12.2	9.89	10.11	0.978239	0.51	0.56	5.559e-06	4.459e-05
ZBTB47	3p22.1	8.84	8.55	1.03392	0.66	0.64	5.578e-06	4.471e-05
ARL15	5q11.2	8.4	8.02	1.04738	0.86	0.96	5.589e-06	4.477e-05
TXNL4A	18q23	9.65	9.88	0.976721	0.51	0.63	5.616e-06	4.497e-05
HSPBP1	19q13.42	9.14	9.41	0.971307	0.58	0.75	5.62e-06	4.497e-05
RNF126	19p13.3	8.45	8.74	0.966819	0.69	0.68	5.665e-06	4.53e-05
UBQLN4	1q22	10.8	11.04	0.978261	0.55	0.57	5.699e-06	4.552e-05
IDI2	10p15.3	5.72	5.97	0.958124	0.55	0.72	5.699e-06	4.552e-05
TBC1D31	8q24.13	7.29	7.68	0.949219	0.9	0.88	5.706e-06	4.554e-05
CHEK2	22q12.1	7.51	7.83	0.959132	0.74	0.8	5.726e-06	4.567e-05
AURKA	20q13.2	8.17	8.72	0.936927	1.29	1.19	5.731e-06	4.569e-05
RAPGEF2	4q32.1	9.48	9.25	1.02486	0.52	0.61	5.738e-06	4.571e-05
F8	Xq28	8.68	8.33	1.04202	0.81	0.82	5.742e-06	4.571e-05
TUBB4B	9q34.3	12.23	12.49	0.979183	0.6	0.66	5.749e-06	4.574e-05
PDZD2	5p13.3	8.82	8.31	1.06137	1.17	1.31	5.776e-06	4.592e-05
BAIAP2	17q25.3	9.92	10.24	0.96875	0.72	0.81	5.778e-06	4.592e-05
SAAL1	11p15.1	7.54	7.77	0.970399	0.52	0.62	5.792e-06	4.6e-05
COL6A1	21q22.3	13.9	13.31	1.04433	1.4	1.16	5.797e-06	4.601e-05
MSX1	4p16.2	6.11	5.69	1.07381	0.96	1.05	5.828e-06	4.623e-05
SLC19A1	21q22.3	8.26	8.59	0.961583	0.77	0.83	5.836e-06	4.626e-05
DDA1	19p13.11	9.32	9.51	0.980021	0.42	0.54	5.854e-06	4.636e-05
ASPSCR1	17q25.3	8.51	8.81	0.965948	0.68	0.79	5.856e-06	4.636e-05
GGCT	7p14.3	10.7	11.02	0.970962	0.72	0.8	5.874e-06	4.645e-05
TIMM10	11q12.1	8.64	8.9	0.970787	0.57	0.66	5.875e-06	4.645e-05
LRCH1	13q14.13-q14.2	9.18	8.91	1.0303	0.64	0.64	5.881e-06	4.647e-05
IGFBP4	17q21.2	13.85	13.44	1.03051	0.92	1.12	5.891e-06	4.65e-05
AFG3L2	18p11.21	10.35	10.54	0.981973	0.43	0.56	5.891e-06	4.65e-05
AAK1	2p13.3	9.99	9.78	1.02147	0.48	0.5	5.902e-06	4.655e-05
ATG2B	14q32.2	9.92	9.69	1.02374	0.5	0.66	5.923e-06	4.669e-05
DDR1	6p21.33	12.53	12.85	0.975097	0.76	0.65	5.934e-06	4.675e-05
C1ORF174	1p36.32	8.54	8.68	0.983871	0.32	0.43	5.942e-06	4.678e-05
TRAF2	9q34.3	8.78	9.03	0.972315	0.57	0.66	5.976e-06	4.702e-05
CCNH	5q14.3	9.13	8.94	1.02125	0.43	0.52	6.008e-06	4.724e-05
RAVER1	19p13.2	10.33	10.51	0.982873	0.39	0.52	6.037e-06	4.745e-05
MPHOSPH10	2p13.3	9.82	9.99	0.982983	0.37	0.45	6.046e-06	4.748e-05
SLC30A1	1q32.3	8.8	8.48	1.03774	0.71	0.92	6.069e-06	4.764e-05
TEPSIN	17q25.3	7.87	8.16	0.964461	0.65	0.7	6.138e-06	4.814e-05
TOMM6	6p21.1	10.87	11.08	0.981047	0.48	0.63	6.145e-06	4.817e-05
ACOT8	20q13.12	8.18	8.4	0.97381	0.51	0.61	6.155e-06	4.822e-05
KIFC2	8q24.3	8.64	9.14	0.945295	1.15	1.17	6.161e-06	4.823e-05
LRRC15	3q29	11.54	10.63	1.08561	2.12	1.84	6.214e-06	4.862e-05
MRPL11	11q13.2	9.1	9.33	0.975348	0.49	0.71	6.225e-06	4.868e-05
C5ORF15	5q31.1	10.92	10.73	1.01771	0.42	0.52	6.263e-06	4.895e-05
GAS1	9q21.33	9.23	8.56	1.07827	1.56	1.34	6.279e-06	4.904e-05
ALKBH6	19q13.12	6.52	6.8	0.958824	0.66	0.74	6.284e-06	4.905e-05
CRTC3	15q26.1	10.34	10.18	1.01572	0.37	0.48	6.292e-06	4.909e-05
CNOT11	2q11.2	10	10.18	0.982318	0.42	0.4	6.33e-06	4.935e-05
MTHFD2	2p13.1	10.55	10.87	0.970561	0.74	0.76	6.375e-06	4.967e-05
CPTP	1p36.33	8.91	9.21	0.967427	0.69	0.77	6.455e-06	5.026e-05
IRS1	2q36.3	10.35	9.87	1.04863	1.08	1.42	6.494e-06	5.049e-05
IFFO1	12p13.31	7.48	7.06	1.05949	0.97	0.93	6.494e-06	5.049e-05
HRAS	11p15.5	8.61	8.97	0.959866	0.82	0.9	6.496e-06	5.049e-05
ADAM12	10q26.2	11.19	10.48	1.06775	1.69	1.36	6.57e-06	5.103e-05
ATP2B4	1q32.1	11.8	11.48	1.02787	0.75	0.81	6.625e-06	5.143e-05
MAP4K2	11q13.1	8.33	8.62	0.966357	0.66	0.64	6.688e-06	5.189e-05
BPHL	6p25.2	8.61	8.83	0.975085	0.49	0.6	6.722e-06	5.212e-05
STEAP1	7q21.13	7.79	7.25	1.07448	1.23	1.4	6.727e-06	5.212e-05
BCL2L12	19q13.33	7.77	8.07	0.962825	0.67	0.89	6.77e-06	5.243e-05
RACGAP1	12q13.12	9.42	9.82	0.959267	0.93	0.88	6.809e-06	5.27e-05
TSPAN7	Xp11.4	7.93	7.29	1.08779	1.49	1.46	6.862e-06	5.307e-05
PODXL2	3q21.3	8.82	9.45	0.933333	1.48	1.35	6.87e-06	5.31e-05
MFSD10	4p16.3	10.02	10.31	0.971872	0.64	0.76	6.879e-06	5.313e-05
DPP4	2q24.2	7.71	6.96	1.10776	1.77	1.55	6.882e-06	5.313e-05
CTU2	16q24.3	7.21	7.53	0.957503	0.74	0.8	6.888e-06	5.315e-05
RUVBL1	3q21.3	10	10.24	0.976562	0.56	0.57	6.936e-06	5.349e-05
AXIN1	16p13.3	9.59	9.85	0.973604	0.62	0.59	6.995e-06	5.389e-05
GJC1	17q21.31	8.06	7.7	1.04675	0.82	0.95	6.997e-06	5.389e-05
MGLL	3q21.3	10.68	10.19	1.04809	1.13	1.18	7.024e-06	5.407e-05
TAL1	1p33	5.76	5.3	1.08679	1.08	1.06	7.035e-06	5.412e-05
UMPS	3q21.2	9.4	9.57	0.982236	0.4	0.42	7.075e-06	5.44e-05
ALOX5AP	13q12.3	8.62	8.19	1.0525	0.98	1.08	7.091e-06	5.448e-05
PLS3	Xq23	11.47	10.97	1.04558	1.2	1	7.142e-06	5.484e-05
INPP4B	4q31.21	9.15	8.57	1.06768	1.28	1.77	7.199e-06	5.523e-05
NAP1L4	11p15.4	11.34	11.5	0.986087	0.38	0.4	7.201e-06	5.523e-05
WDHD1	14q22.2-q22.3	7.79	8.14	0.957002	0.8	0.83	7.229e-06	5.541e-05
EMP3	19q13.33	9.13	8.73	1.04582	0.94	0.9	7.234e-06	5.541e-05
NUDT19	19q13.11	8.78	9.06	0.969095	0.66	0.74	7.243e-06	5.545e-05
MTCH2	11p11.2	10.8	10.98	0.983607	0.42	0.47	7.251e-06	5.548e-05
DFFB	1p36.32	6.63	6.88	0.963663	0.57	0.57	7.293e-06	5.577e-05
ZNF707	8q24.3	7.77	8.09	0.960445	0.75	0.8	7.312e-06	5.588e-05
GIPC1	19p13.12	10.61	10.88	0.975184	0.63	0.76	7.42e-06	5.667e-05
PCDHB4	5q31.3	6.69	6.11	1.09493	1.37	1.32	7.466e-06	5.699e-05
FAM189B	1q22	9.59	9.87	0.971631	0.66	0.71	7.471e-06	5.699e-05
2017-09-03	22q13.2	7.01	7.76	0.903351	1.73	1.78	7.503e-06	5.718e-05
SLC25A29	14q32.2	9.19	9.56	0.961297	0.84	0.94	7.506e-06	5.718e-05
MLF2	12p13.31	11.78	11.99	0.982485	0.48	0.6	7.509e-06	5.718e-05
CSF1R	5q32	10.25	9.81	1.04485	1.02	1.02	7.539e-06	5.738e-05
ZNF282	7q36.1	9.29	9.51	0.976866	0.51	0.52	7.56e-06	5.75e-05
RDH13	19q13.42	7.64	7.89	0.968314	0.56	0.7	7.571e-06	5.755e-05
PSMD4	1q21.3	11.52	11.75	0.980426	0.51	0.56	7.583e-06	5.758e-05
PLPP2	19p13.3	10.15	10.57	0.960265	0.97	0.93	7.584e-06	5.758e-05
CAT	11p13	10.84	10.56	1.02652	0.66	0.64	7.589e-06	5.759e-05
PTRH2	17q23.1	8.64	8.91	0.969697	0.59	0.82	7.598e-06	5.762e-05
SEM1	7q21.3	10.36	10.62	0.975518	0.59	0.72	7.62e-06	5.775e-05
NDUFV1	11q13.2	10.44	10.72	0.973881	0.65	0.73	7.642e-06	5.789e-05
PRR16	5q23.1	5.63	5.06	1.11265	1.35	1.24	7.724e-06	5.847e-05
CAMSAP3	19p13.2	8.93	9.46	0.943975	1.29	0.78	7.79e-06	5.893e-05
GUCY1B1	4q32.1	8.51	8.15	1.04417	0.83	0.83	7.797e-06	5.895e-05
GYPC	2q14.3	8.68	8.25	1.05212	1.02	0.98	7.832e-06	5.918e-05
SMPDL3B	1p35.3	7.77	8.21	0.946407	1.02	1.1	7.855e-06	5.932e-05
SQLE	8q24.13	10.35	10.79	0.959222	1.03	1.13	7.868e-06	5.939e-05
KLC3	19q13.32	6.16	6.73	0.915305	1.34	1.31	7.932e-06	5.984e-05
EMCN	4q24	8.4	7.88	1.06599	1.23	1.11	7.949e-06	5.992e-05
TRIM24	7q33-q34	9.61	9.84	0.976626	0.53	0.58	7.986e-06	6.013e-05
RTKN2	10q21.2	6.91	7.37	0.937585	1.07	1.07	7.986e-06	6.013e-05
DUSP1	5q35.1	11.51	10.89	1.05693	1.48	1.37	8.016e-06	6.032e-05
ARHGEF6	Xq26.3	10.21	9.77	1.04504	1	1.1	8.021e-06	6.032e-05
CCND2	12p13.32	9.62	9.17	1.04907	1.05	0.97	8.025e-06	6.032e-05
TPGS2	18q12.2	10.02	10.23	0.979472	0.47	0.65	8.087e-06	6.072e-05
TIE1	1p34.2	9.1	8.66	1.05081	1.06	0.89	8.087e-06	6.072e-05
HTATSF1	Xq26.3	10.92	11.06	0.987342	0.31	0.48	8.113e-06	6.088e-05
FANCB	Xp22.2	4.26	4.68	0.910256	0.97	1.07	8.145e-06	6.108e-05
E2F7	12q21.2	5.76	6.3	0.914286	1.27	1.39	8.199e-06	6.145e-05
TRMT1	19p13.13	8.71	9.01	0.966704	0.7	0.72	8.219e-06	6.155e-05
GOLGA6L9	15q25.2	6.1	6.53	0.93415	1.01	0.96	8.222e-06	6.155e-05
SULF1	8q13.2-q13.3	12.6	12.03	1.04738	1.35	1.28	8.286e-06	6.197e-05
FBXL19	16p11.2	8.87	9.13	0.971522	0.62	0.69	8.293e-06	6.197e-05
PA2G4	12q13.2	11.58	11.73	0.987212	0.35	0.47	8.294e-06	6.197e-05
ALKBH8	11q22.3	7.92	7.66	1.03394	0.6	0.6	8.305e-06	6.202e-05
RASA3	13q34	9.33	8.98	1.03898	0.83	0.84	8.336e-06	6.222e-05
KDF1	1p36.11	8.28	8.74	0.947368	1.15	0.56	8.372e-06	6.245e-05
PLAGL2	20q11.21	9.13	9.34	0.977516	0.49	0.55	8.419e-06	6.275e-05
GULP1	2q32.1-q32.2	7.26	6.65	1.09173	1.45	1.35	8.421e-06	6.275e-05
IMP4	2q21.1	9.14	9.33	0.979636	0.43	0.53	8.468e-06	6.302e-05
MOCS3	20q13.13	7.96	8.16	0.97549	0.48	0.56	8.469e-06	6.302e-05
FUS	16p11.2	12.03	12.25	0.982041	0.52	0.51	8.538e-06	6.35e-05
FLT4	5q35.3	8.15	7.76	1.05026	0.91	0.88	8.672e-06	6.446e-05
ITPRIP	10q25.1	9.44	9.07	1.04079	0.87	0.81	8.769e-06	6.515e-05
ACAD9	3q21.3	9.68	9.85	0.982741	0.38	0.44	8.906e-06	6.613e-05
FBXL7	5p15.1	9.31	8.86	1.05079	0.99	1.36	8.975e-06	6.66e-05
ZNF692	1q44	8.58	8.95	0.958659	0.86	0.85	9.032e-06	6.698e-05
TRIM68	11p15.4	7.74	7.41	1.04453	0.71	1.08	9.047e-06	6.705e-05
POLR2D	2q14.3	8.98	9.16	0.980349	0.42	0.48	9.072e-06	6.72e-05
U2AF1	21q22.3	10.31	10.53	0.979107	0.51	0.58	9.079e-06	6.721e-05
SNX1	15q22.31	11.48	11.29	1.01683	0.44	0.6	9.162e-06	6.779e-05
FKBP14	7p14.3	8.06	7.65	1.05359	0.97	0.83	9.17e-06	6.781e-05
KLHDC3	6p21.1	10.72	10.95	0.978995	0.53	0.65	9.188e-06	6.79e-05
COL4A2	13q34	13.23	12.84	1.03037	0.95	0.82	9.253e-06	6.835e-05
LIX1L	1q21.1	8.79	8.42	1.04394	0.89	0.76	9.259e-06	6.835e-05
TMEM245	9q31.3	10.82	10.59	1.02172	0.54	0.61	9.27e-06	6.839e-05
EVC	4p16.2	9.46	9.01	1.04994	1.07	1.03	9.281e-06	6.843e-05
MAGOH	1p32.3	8.71	8.92	0.976457	0.48	0.67	9.309e-06	6.86e-05
SSH1	12q24.11	10.23	10.04	1.01892	0.45	0.51	9.426e-06	6.942e-05
RAB11FIP4	17q11.2	9.58	9.94	0.963783	0.87	0.85	9.469e-06	6.97e-05
MTHFD2L	4q13.3	7.37	7.67	0.960887	0.7	0.72	9.512e-06	6.997e-05
DNAJC3	13q32.1	11.32	11.1	1.01982	0.51	0.65	9.542e-06	7.016e-05
KPNA2	17q24.2	11.1	11.49	0.966057	0.91	0.98	9.555e-06	7.021e-05
PTGES2	9q34.11	9.14	9.39	0.973376	0.58	0.66	9.578e-06	7.034e-05
CDH23	10q22.1	6.46	5.83	1.10806	1.51	1.43	9.642e-06	7.077e-05
ZMAT3	3q26.32	7.1	6.68	1.06287	0.99	0.93	9.688e-06	7.106e-05
FIGNL1	7p12.2	8.14	8.41	0.967895	0.64	0.67	9.704e-06	7.114e-05
GPRASP2	Xq22.1	7.9	7.61	1.03811	0.68	0.85	9.725e-06	7.125e-05
POP1	8q22.2	7.56	7.87	0.96061	0.74	0.84	9.733e-06	7.127e-05
SCARF2	22q11.21	8.17	7.6	1.075	1.35	1.24	9.77e-06	7.15e-05
STARD7	2q11.2	11.69	11.84	0.987331	0.36	0.41	9.839e-06	7.196e-05
CNOT10	3p22.3	9.29	9.45	0.983069	0.38	0.39	9.88e-06	7.222e-05
ZNF777	7q36.1	8.64	8.83	0.978482	0.46	0.48	9.886e-06	7.223e-05
TPBG	6q14.1	10.58	10.27	1.03019	0.68	0.98	9.895e-06	7.225e-05
CCDC14	3q21.1	9.29	9.59	0.968717	0.7	0.78	9.929e-06	7.246e-05
MAP1B	5q13.2	10.36	9.86	1.05071	1.2	1.14	9.984e-06	7.281e-05
ZBTB38	3q23	10.74	10.49	1.02383	0.55	0.71	9.991e-06	7.283e-05
NARF	17q25.3	9.28	9.52	0.97479	0.56	0.67	1.01e-05	7.359e-05
ACYP1	14q24.3	5.85	6.21	0.942029	0.85	0.8	1.012e-05	7.369e-05
TATDN2	3p25.3	10.42	10.56	0.986742	0.33	0.42	1.014e-05	7.378e-05
MRPL15	8q11.23	9.7	9.97	0.972919	0.63	0.75	1.015e-05	7.378e-05
IGSF9	1q23.2	9.23	9.7	0.951546	1.11	1.07	1.016e-05	7.385e-05
ARL16	17q25.3	8.53	8.79	0.970421	0.61	0.66	1.021e-05	7.415e-05
FNDC3B	3q26.31	11.05	10.73	1.02982	0.78	0.77	1.023e-05	7.424e-05
PRMT7	16q22.1	8.78	9	0.975556	0.51	0.56	1.027e-05	7.453e-05
VARS2	6p21.33	9.31	9.52	0.977941	0.51	0.52	1.035e-05	7.508e-05
SAE1	19q13.32	10.94	11.12	0.983813	0.41	0.46	1.039e-05	7.531e-05
COX8A	11q13.1	10.81	11.05	0.978281	0.54	0.69	1.04e-05	7.531e-05
NUMB	14q24.2-q24.3	10.57	10.42	1.0144	0.35	0.45	1.045e-05	7.568e-05
RFX7	15q21.3	9.36	9.16	1.02183	0.46	0.66	1.052e-05	7.608e-05
SOX7	8p23.1	7.19	6.69	1.07474	1.21	1.03	1.052e-05	7.608e-05
RAB11FIP2	10q26.11	8.72	8.5	1.02588	0.51	0.59	1.058e-05	7.648e-05
KLHDC4	16q24.2	7.67	7.99	0.95995	0.75	0.81	1.061e-05	7.665e-05
ARHGEF15	17p13.1	8.21	7.74	1.06072	1.15	0.93	1.07e-05	7.721e-05
HLX	1q41	7	6.59	1.06222	0.97	0.9	1.083e-05	7.813e-05
CDKN3	14q22.2	6.77	7.26	0.932507	1.18	1.14	1.083e-05	7.813e-05
UGCG	9q31.3	9.44	8.89	1.06187	1.29	1.6	1.085e-05	7.82e-05
LUZP1	1p36.12	9.94	9.68	1.02686	0.62	0.6	1.087e-05	7.829e-05
CPSF3	2p25.1	9.72	9.9	0.981818	0.41	0.48	1.108e-05	7.976e-05
ARF5	7q32.1	11.28	11.5	0.98087	0.53	0.62	1.111e-05	7.992e-05
ZFYVE16	5q14.1	10.33	10.12	1.02075	0.48	0.65	1.115e-05	8.017e-05
GNB5	15q21.2	8.73	8.47	1.0307	0.6	0.78	1.118e-05	8.036e-05
FRMD4B	3p14.1	8.98	8.68	1.03456	0.71	0.81	1.134e-05	8.145e-05
RPS6KA3	Xp22.12	9.76	9.37	1.04162	0.95	0.94	1.139e-05	8.175e-05
SCUBE2	11p15.4	11.77	10.66	1.10413	2.56	3.09	1.142e-05	8.197e-05
ALOX5	10q11.21	8.82	8.39	1.05125	1.01	1.1	1.145e-05	8.207e-05
NDFIP1	5q31.3	11.81	11.63	1.01548	0.43	0.53	1.149e-05	8.232e-05
EXOSC6	16q22.1	7.83	8.04	0.973881	0.49	0.59	1.151e-05	8.244e-05
MSR1	8p22	9.96	9.51	1.04732	1.08	1.06	1.155e-05	8.265e-05
FAM124B	2q36.2	5.35	4.85	1.10309	1.22	1.08	1.165e-05	8.336e-05
CLCN2	3q27.1	6.79	7.14	0.95098	0.85	0.79	1.167e-05	8.347e-05
TMEM106C	12q13.11	10.44	10.73	0.972973	0.7	0.7	1.169e-05	8.353e-05
NACAD	7p13	5.91	5.36	1.10261	1.31	1.41	1.173e-05	8.381e-05
CRYBG3	3q11.2	8.05	7.49	1.07477	1.36	1.27	1.18e-05	8.426e-05
POLG2	17q23.3	6.72	6.96	0.965517	0.57	0.58	1.182e-05	8.432e-05
TENM4	11q14.1	8.33	7.75	1.07484	1.42	1.28	1.183e-05	8.432e-05
PPP1R35	7q22.1	7.47	7.79	0.958922	0.77	0.87	1.185e-05	8.44e-05
RNASE4	14q11.2	10.28	9.9	1.03838	0.88	1.17	1.185e-05	8.44e-05
FIP1L1	4q12	9.54	9.69	0.98452	0.33	0.4	1.186e-05	8.44e-05
DENND5B	12p11.21	8.08	7.72	1.04663	0.85	1.06	1.187e-05	8.44e-05
SNAPC4	9q34.3	8.16	8.42	0.969121	0.62	0.61	1.187e-05	8.44e-05
SLC16A2	Xq13.2	9.26	8.85	1.04633	0.96	1.16	1.189e-05	8.45e-05
CCT5	5p15.2	12.21	12.43	0.982301	0.51	0.66	1.192e-05	8.467e-05
CEBPG	19q13.11	10.04	10.22	0.982387	0.39	0.6	1.194e-05	8.478e-05
FBXO46	19q13.32	8.9	9.15	0.972678	0.6	0.59	1.195e-05	8.478e-05
MGME1	20p11.23	9.03	9.23	0.978332	0.48	0.54	1.202e-05	8.521e-05
INPP1	2q32.2	7.82	7.48	1.04545	0.8	0.78	1.211e-05	8.58e-05
ZNF225	19q13.31	6.51	6.28	1.03662	0.52	0.69	1.211e-05	8.58e-05
GGTA1P	9q33.2	7.35	6.86	1.07143	1.17	1.15	1.215e-05	8.601e-05
GPRIN3	4q22.1	7.36	6.79	1.08395	1.36	1.46	1.222e-05	8.646e-05
C12ORF73	12q23.3	6.9	7.15	0.965035	0.59	0.64	1.235e-05	8.731e-05
ANAPC5	12q24.31	11.11	11.24	0.988434	0.31	0.36	1.238e-05	8.749e-05
MAP3K12	12q13.13	7.91	7.54	1.04907	0.89	1.03	1.244e-05	8.783e-05
NUPL2	7p15.3	8.42	8.6	0.97907	0.41	0.54	1.245e-05	8.783e-05
LAPTM4A	2p24.1	13.22	13.05	1.01303	0.43	0.41	1.245e-05	8.783e-05
ZC3HC1	7q32.2	8.3	8.46	0.981087	0.37	0.44	1.246e-05	8.789e-05
CA12	15q22.2	12.79	12.02	1.06406	1.73	2.49	1.251e-05	8.817e-05
DLL1	6q27	7	6.53	1.07198	1.12	1.15	1.252e-05	8.817e-05
CCDC152	5p12	5.95	5.53	1.07595	0.99	1.12	1.262e-05	8.888e-05
FAM50A	Xq28	9.9	10.19	0.971541	0.69	0.72	1.268e-05	8.919e-05
SKAP2	7p15.2	9.3	8.93	1.04143	0.89	0.95	1.271e-05	8.936e-05
LOC728743	7q36.1	6.96	7.23	0.962656	0.65	0.76	1.273e-05	8.948e-05
TNC	9q33.1	12.33	11.64	1.05928	1.68	1.64	1.29e-05	9.064e-05
CAPN10	2q37.3	7.27	7.64	0.951571	0.91	0.79	1.298e-05	9.111e-05
LIN7B	19q13.33	4.68	5.09	0.91945	0.97	1.09	1.3e-05	9.122e-05
FAM107B	10p13	11.15	10.76	1.03625	0.94	0.82	1.313e-05	9.211e-05
ZNF76	6p21.31	9.05	9.28	0.975216	0.56	0.53	1.322e-05	9.263e-05
RSPO3	6q22.33	6.04	5.37	1.12477	1.64	1.5	1.322e-05	9.263e-05
FAAP24	19q13.11	5.84	6.07	0.962109	0.53	0.63	1.327e-05	9.294e-05
COA7	1p32.3	7.65	7.87	0.972046	0.52	0.65	1.329e-05	9.294e-05
PLB1	2p23.2	5.48	5.03	1.08946	1.05	1.26	1.33e-05	9.294e-05
CDC42EP3	2p22.2	9.15	8.73	1.04811	1.01	1.07	1.33e-05	9.294e-05
SPATA2L	16q24.3	7.36	7.69	0.957087	0.78	0.84	1.352e-05	9.446e-05
GNB2	7q22.1	11.92	12.13	0.982688	0.5	0.57	1.354e-05	9.452e-05
CCDC86	11q12.2	9.03	9.26	0.975162	0.54	0.66	1.355e-05	9.453e-05
DISP1	1q41	7.99	7.74	1.0323	0.58	0.72	1.363e-05	9.505e-05
UNG	12q24.11	9.92	10.15	0.97734	0.54	0.59	1.367e-05	9.528e-05
HSF1	8q24.3	10.51	10.78	0.974954	0.63	0.73	1.369e-05	9.535e-05
C1ORF112	1q24.2	7.9	8.18	0.96577	0.65	0.75	1.374e-05	9.566e-05
BOLA1	1q21.2	7.96	8.26	0.96368	0.72	0.81	1.385e-05	9.638e-05
CENPBD1	16q24.3	7.94	8.16	0.973039	0.54	0.61	1.388e-05	9.654e-05
IFRD2	3p21.31	9.41	9.63	0.977155	0.54	0.57	1.389e-05	9.655e-05
FAM3A	Xq28	9.07	9.31	0.974221	0.55	0.71	1.401e-05	9.731e-05
CYB5R3	22q13.2	11.95	11.73	1.01876	0.55	0.54	1.408e-05	9.777e-05
ELOVL5	6p12.1	12.91	12.44	1.03778	1.11	1.17	1.41e-05	9.786e-05
ZC3H8	2q14.1	7.11	7.32	0.971311	0.51	0.54	1.417e-05	9.827e-05
B4GALT3	1q23.3	10.35	10.61	0.975495	0.63	0.63	1.42e-05	9.843e-05
MRS2	6p22.3	9.49	9.68	0.980372	0.47	0.46	1.425e-05	9.872e-05
RAPGEFL1	17q21.1	7.38	7.92	0.931818	1.27	1.56	1.43e-05	9.901e-05
RAI14	5p13.2	10.63	10.28	1.03405	0.85	0.77	1.43e-05	9.901e-05
CPXM2	10q26.13	9.27	8.69	1.06674	1.42	1.34	1.443e-05	9.981e-05
PDE1B	12q13.2	7.14	6.6	1.08182	1.34	0.99	1.447e-05	0.0001
IGBP1	Xq13.1	10.49	10.29	1.01944	0.47	0.59	1.449e-05	0.0001001
LSM7	19p13.3	8.44	8.77	0.962372	0.8	0.83	1.452e-05	0.0001003
RBM10	Xp11.3	10.19	10.37	0.982642	0.44	0.42	1.458e-05	0.0001007
UBAP2	9p13.3	9.84	10.04	0.98008	0.49	0.52	1.485e-05	0.0001025
NABP2	12q13.3	9.43	9.6	0.982292	0.39	0.45	1.505e-05	0.0001038
RIBC2	22q13.31	4.92	5.39	0.912801	1.16	1.15	1.507e-05	0.0001039
AIFM1	Xq26.1	9.99	10.18	0.981336	0.45	0.51	1.517e-05	0.0001045
SORCS2	4p16.1	7.67	6.92	1.10838	1.82	1.78	1.519e-05	0.0001046
STX2	12q24.33	8.02	7.76	1.03351	0.64	0.61	1.527e-05	0.0001051
SASS6	1p21.2	7.31	7.59	0.963109	0.67	0.65	1.532e-05	0.0001053
SLC12A9	7q22.1	9.39	9.62	0.976091	0.56	0.61	1.534e-05	0.0001054
TSPAN31	12q14.1	10.16	9.89	1.0273	0.64	0.69	1.549e-05	0.0001064
OLFML2A	9q33.3	9.89	9.54	1.03669	0.83	0.9	1.561e-05	0.0001072
ARHGAP33	19q13.12	7.23	7.65	0.945098	1	1.05	1.562e-05	0.0001072
HCN3	1q22	6.23	6.57	0.94825	0.81	0.89	1.581e-05	0.0001084
ESRRA	11q13.1	8.77	9.06	0.967991	0.67	0.79	1.582e-05	0.0001084
STAB1	3p21.1	10.01	9.6	1.04271	1.02	0.9	1.584e-05	0.0001085
SLC12A6	15q14	8.88	8.61	1.03136	0.67	0.71	1.592e-05	0.0001091
PDK4	7q21.3	9.63	8.86	1.08691	1.88	1.72	1.601e-05	0.0001095
MFRP	11q23.3	9.18	8.68	1.0576	1.22	1.13	1.624e-05	0.000111
CTGF	6q23.2	12.79	12.21	1.0475	1.41	1.31	1.624e-05	0.000111
NADSYN1	11q13.4	9.56	9.82	0.973523	0.61	0.72	1.637e-05	0.0001119
DHODH	16q22.2	6.7	6.96	0.962644	0.62	0.68	1.643e-05	0.0001122
SYNGR2	17q25.3	12.11	12.35	0.980567	0.59	0.69	1.644e-05	0.0001122
ARFGAP1	20q13.33	10.39	10.63	0.977422	0.58	0.66	1.65e-05	0.0001125
DYNLT1	6q25.3	10.35	10.58	0.978261	0.57	0.62	1.651e-05	0.0001125
NIT2	3q12.2	9.69	9.88	0.980769	0.44	0.51	1.653e-05	0.0001127
MANEA	6q16.1	8.79	8.53	1.03048	0.6	0.74	1.654e-05	0.0001127
CAMKMT	2p21	6.37	6.61	0.963691	0.57	0.7	1.655e-05	0.0001127
ODF2	9q34.11	10.16	10.35	0.981643	0.46	0.49	1.657e-05	0.0001128
CARM1	19p13.2	10.06	10.22	0.984344	0.37	0.51	1.667e-05	0.0001134
FAM46A	6q14.1	9.53	9.09	1.0484	1.07	1	1.688e-05	0.0001147
FTX	Xq13.2	5.26	4.98	1.05622	0.64	0.83	1.696e-05	0.0001152
MYLK	3q21.1	11.23	10.72	1.04757	1.24	1.18	1.696e-05	0.0001152
MTG2	20q13.33	8.82	9.07	0.972437	0.6	0.6	1.701e-05	0.0001154
DGKZ	11p11.2	9.3	9.64	0.96473	0.84	0.76	1.715e-05	0.0001163
ATP6AP2	Xp11.4	12.23	12.03	1.01663	0.49	0.47	1.736e-05	0.0001177
TALDO1	11p15.5	11.45	11.66	0.98199	0.51	0.61	1.748e-05	0.0001184
CPNE8	12q12	7.14	6.66	1.07207	1.17	1.1	1.748e-05	0.0001184
THAP8	19q13.12	6.87	7.07	0.971711	0.47	0.63	1.753e-05	0.0001186
PYCR3	8q24.3	8.81	9.16	0.96179	0.84	0.91	1.756e-05	0.0001188
TRAP1	16p13.3	10.74	10.96	0.979927	0.54	0.63	1.757e-05	0.0001188
ISG20L2	1q23.1	9.91	10.08	0.983135	0.4	0.54	1.762e-05	0.0001191
TBRG1	11q24.2	9.28	9.11	1.01866	0.42	0.51	1.766e-05	0.0001193
CCNE2	8q22.1	7.35	7.87	0.933926	1.28	1.26	1.769e-05	0.0001194
ZNF598	16p13.3	9.38	9.63	0.974039	0.61	0.63	1.772e-05	0.0001196
SYNPO2	4q26	9.87	9.27	1.06472	1.47	1.44	1.774e-05	0.0001196
REXO4	9q34.2	8.97	9.15	0.980328	0.43	0.51	1.791e-05	0.0001207
DEDD	1q23.3	9.91	10.07	0.984111	0.38	0.47	1.796e-05	0.0001209
PSTK	10q26.13	5.34	5.57	0.958707	0.55	0.7	1.796e-05	0.0001209
MFSD12	19p13.3	9.76	10.01	0.975025	0.61	0.67	1.806e-05	0.0001215
ZFP36	19q13.2	11.44	10.88	1.05147	1.39	1.21	1.814e-05	0.000122
ABT1	6p22.2	9.07	9.23	0.982665	0.38	0.49	1.816e-05	0.0001221
MYL9	20q11.23	12.22	11.8	1.03559	1.04	1.07	1.83e-05	0.0001229
FBLN2	3p25.1	11.55	10.96	1.05383	1.46	1.38	1.835e-05	0.0001232
TMED10	14q24.3	13.08	12.92	1.01238	0.37	0.47	1.837e-05	0.0001233
ZNF583	19q13.43	6.32	6.04	1.04636	0.65	0.9	1.841e-05	0.0001235
SRSF3	6p21.31-p21.2	12.24	12.36	0.990291	0.29	0.32	1.842e-05	0.0001235
CCDC142	2p13.1	7.17	7.38	0.971545	0.51	0.56	1.855e-05	0.0001243
BCAT1	12p12.1	8.93	8.36	1.06818	1.44	1.2	1.858e-05	0.0001244
SLC25A33	1p36.22	7.37	7.63	0.965924	0.59	0.77	1.866e-05	0.0001249
SLC9A9	3q24	6.93	6.52	1.06288	1.02	0.98	1.877e-05	0.0001256
NDUFB9	8q24.13	11.2	11.48	0.97561	0.67	0.84	1.883e-05	0.0001258
WDR92	2p14	7.91	8.04	0.983831	0.3	0.38	1.884e-05	0.0001258
NACC1	19p13.13	10.8	11.02	0.980036	0.53	0.55	1.884e-05	0.0001258
RRM2	2p25.1	9.23	9.79	0.942799	1.41	1.29	1.884e-05	0.0001258
MRPS18A	6p21.1	9.23	9.42	0.97983	0.44	0.56	1.899e-05	0.0001267
CTF1	16p11.2	6.76	6.24	1.08333	1.26	1.48	1.904e-05	0.000127
GIMAP8	7q36.1	8.16	7.73	1.05563	1.05	0.94	1.911e-05	0.0001274
ZFAND2B	2q35	8.4	8.62	0.974478	0.52	0.62	1.921e-05	0.0001279
KAT2B	3p24.3	8.46	8.16	1.03676	0.73	0.84	1.924e-05	0.0001281
LSM11	5q33.3	7.81	7.6	1.02763	0.51	0.51	1.929e-05	0.0001284
PSMC3	11p11.2	10.87	11.06	0.982821	0.47	0.54	1.932e-05	0.0001285
CASC3	17q21.1	11.21	11.43	0.980752	0.5	0.84	1.94e-05	0.000129
TRPC1	3q23	6.61	6.1	1.08361	1.28	1	1.941e-05	0.000129
RIOK1	6p24.3	8.8	8.99	0.978865	0.43	0.65	1.96e-05	0.0001302
UBE2Q1	1q21.3	10.94	11.1	0.985586	0.4	0.43	1.966e-05	0.0001305
COBLL1	2q24.3	9.61	9.25	1.03892	0.86	0.95	1.969e-05	0.0001306
CALD1	7q33	12.67	12.25	1.03429	1.07	0.89	1.975e-05	0.000131
GINS3	16q21	7.21	7.5	0.961333	0.7	0.72	1.977e-05	0.000131
ZBTB3	11q12.3	6.37	6.58	0.968085	0.52	0.54	1.979e-05	0.0001311
MOV10	1p13.2	9.94	10.15	0.97931	0.51	0.56	2.011e-05	0.0001331
FAM198B	4q32.1	12.07	11.61	1.03962	1.05	1.54	2.019e-05	0.0001336
LRRC14	8q24.3	9.24	9.49	0.973656	0.61	0.68	2.021e-05	0.0001337
OGFOD2	12q24.31	7.74	8	0.9675	0.64	0.68	2.023e-05	0.0001337
TMEM133	11q22.1	6.03	5.69	1.05975	0.84	0.91	2.035e-05	0.0001345
EHD4	15q15.1	10.51	10.31	1.0194	0.48	0.47	2.048e-05	0.0001352
RFC3	13q13.2	8.35	8.63	0.967555	0.68	0.72	2.054e-05	0.0001356
NATD1	17p11.2	8.49	8.17	1.03917	0.77	0.82	2.055e-05	0.0001356
STARD4	5q22.1	5.72	5.32	1.07519	0.95	1.08	2.06e-05	0.0001358
COG6	13q14.11	9.27	9.09	1.0198	0.43	0.61	2.068e-05	0.0001363
PAPPA	9q33.1	6.51	5.97	1.09045	1.32	1.38	2.08e-05	0.000137
FAXDC2	5q33.2	8.69	8.08	1.0755	1.5	1.55	2.081e-05	0.000137
MKRN1	7q34	11.47	11.63	0.986242	0.4	0.4	2.096e-05	0.0001379
RNF5	6p21.32	9.69	9.85	0.983756	0.36	0.5	2.1e-05	0.0001381
KLF10	8q22.3	10.75	10.48	1.02576	0.67	0.7	2.104e-05	0.0001383
DDX11	12p11.21	8.39	8.73	0.961054	0.83	0.86	2.105e-05	0.0001383
PSMA5	1p13.3	10.63	10.81	0.983349	0.44	0.52	2.113e-05	0.0001387
F3	1p21.3	8.71	8.13	1.07134	1.41	1.49	2.117e-05	0.0001389
EEF1E1	6p24.3	8.02	8.23	0.974484	0.53	0.56	2.118e-05	0.000139
PPIAL4C	1q21.2	5.06	5.32	0.951128	0.64	0.68	2.138e-05	0.0001402
H1FX	3q21.3	10.69	10.99	0.972702	0.73	0.8	2.148e-05	0.0001407
UBLCP1	5q33.3	9.26	9.09	1.0187	0.43	0.49	2.159e-05	0.0001413
CKAP2L	2q14.1	6.66	7.21	0.923717	1.35	1.31	2.159e-05	0.0001413
TUBB	6p21.33	14.09	14.31	0.984626	0.54	0.62	2.162e-05	0.0001414
LOC100288778	12p13.33	7.91	8.29	0.954162	0.93	0.99	2.163e-05	0.0001414
HELLS	10q23.33	6.93	7.34	0.944142	1	1.02	2.164e-05	0.0001414
STON1	2p16.3	8.26	7.77	1.06306	1.22	1.08	2.171e-05	0.0001418
DVL1	1p36.33	9.49	9.83	0.965412	0.82	0.8	2.173e-05	0.0001419
MUTYH	1p34.1	6.98	7.25	0.962759	0.65	0.79	2.179e-05	0.0001422
SYT17	16p12.3	7.73	7.11	1.0872	1.45	2.01	2.185e-05	0.0001425
TSC22D4	7q22.1	9.67	9.93	0.973817	0.64	0.68	2.188e-05	0.0001426
INTS5	11q12.3	9.47	9.63	0.983385	0.37	0.46	2.207e-05	0.0001438
BUD23	7q11.23	10.29	10.5	0.98	0.51	0.59	2.219e-05	0.0001445
COA6	1q42.2	8.38	8.64	0.969907	0.64	0.69	2.23e-05	0.0001452
MEPCE	7q22.1	10.28	10.44	0.984674	0.38	0.47	2.249e-05	0.0001463
NOSTRIN	2q24.3	8.67	8.07	1.07435	1.44	1.84	2.251e-05	0.0001464
FCGR2C	1q23.3	6.4	5.95	1.07563	1.1	1.15	2.275e-05	0.0001479
KIAA1549	7q34	8.44	8.79	0.960182	0.86	0.9	2.28e-05	0.0001481
UBTD2	5q35.1	10.15	9.95	1.0201	0.49	0.51	2.286e-05	0.0001484
SS18L1	20q13.33	8.72	8.96	0.973214	0.58	0.66	2.292e-05	0.0001487
ECT2	3q26.31	9.72	10.09	0.96333	0.91	0.88	2.292e-05	0.0001487
PTPN21	14q31.3	8.58	8.19	1.04762	0.96	1.01	2.296e-05	0.0001488
ADAMTSL4	1q21.2	7.71	7.28	1.05907	1.03	1.25	2.296e-05	0.0001488
KCNE4	2q36.1	9.65	8.87	1.08794	1.88	2.26	2.303e-05	0.0001492
RBM8A	1q21.1	11.12	11.32	0.982332	0.5	0.44	2.308e-05	0.0001494
SLC1A3	5p13.2	8.43	7.97	1.05772	1.14	1.08	2.344e-05	0.0001516
PSMC4	19q13.2	10.69	10.85	0.985253	0.38	0.54	2.345e-05	0.0001516
WWTR1	3q25.1	9.03	8.63	1.04635	0.99	1.06	2.359e-05	0.0001525
TGFBR1	9q22.33	10.84	10.48	1.03435	0.89	0.86	2.361e-05	0.0001525
ULK3	15q24.1	9.27	9.5	0.975789	0.58	0.59	2.364e-05	0.0001526
AGK	7q34	9.05	9.21	0.982628	0.39	0.46	2.364e-05	0.0001526
TIMM8A	Xq22.1	6.81	7.03	0.968706	0.53	0.64	2.37e-05	0.0001528
PMS2P5	7q11.23	6	6.24	0.961538	0.59	0.62	2.383e-05	0.0001536
TLR7	Xp22.2	7.65	7.16	1.06844	1.22	1.22	2.389e-05	0.000154
PPARG	3p25.2	7.53	6.88	1.09448	1.66	1.19	2.39e-05	0.000154
FAM133CP	10q21.1	5.04	5.23	0.963671	0.46	0.47	2.393e-05	0.0001541
TBC1D19	4p15.2	6.9	6.66	1.03604	0.59	0.67	2.399e-05	0.0001543
MAGIX	Xp11.23	5.63	6.04	0.932119	1.02	1.06	2.409e-05	0.0001549
POLR2I	19q13.12	8.74	8.97	0.974359	0.54	0.65	2.414e-05	0.0001551
KIF14	1q32.1	6.85	7.46	0.918231	1.53	1.5	2.422e-05	0.0001556
FHAD1	1p36.21	5.4	4.98	1.08434	1.05	1.19	2.437e-05	0.0001565
LYST	1q42.3	9.97	9.65	1.03316	0.76	0.91	2.439e-05	0.0001566
SLC35B2	6p21.1	10.32	10.53	0.980057	0.49	0.56	2.444e-05	0.0001568
ATG101	12q13.13	9.68	9.88	0.979757	0.48	0.54	2.447e-05	0.0001569
GLI4	8q24.3	6.48	6.92	0.936416	1.1	1.16	2.475e-05	0.0001586
INTS11	1p36.33	10.21	10.43	0.978907	0.54	0.54	2.481e-05	0.0001589
YPEL5	2p23.1	11.03	10.89	1.01286	0.37	0.38	2.503e-05	0.0001602
LPP	3q27.3-q28	9.04	8.68	1.04147	0.88	1.08	2.515e-05	0.0001609
TAF1C	16q24.1	8.78	9.03	0.972315	0.61	0.68	2.52e-05	0.0001611
MAP2K7	19p13.2	9.32	9.5	0.981053	0.44	0.54	2.52e-05	0.0001611
[truncated: 10,779 more rows]

## Sheet: cbiopmutuallyexclusivity
Gene A	Gene B	p-Value	Log Odds Ratio	Association
AOC3	MAOA	<0.001	2.039	Tendency towards co-occurrence
PGR	ERBB2	0.013	-1.255	Tendency towards mutual exclusivity
AOC3	ERBB2	0.032	-1.753	Tendency towards mutual exclusivity
MKI67	ESR1	0.038	<-3	Tendency towards mutual exclusivity
MAOA	ERBB2	0.051	-1.219	Tendency towards mutual exclusivity
MAOA	ESR1	0.058	1.122	Tendency towards co-occurrence
MKI67	PGR	0.068	-1.53	Tendency towards mutual exclusivity
ESR1	ERBB2	0.079	-0.923	Tendency towards mutual exclusivity
LOX	ESR1	0.085	<-3	Tendency towards mutual exclusivity
AOC3	MKI67	0.092	<-3	Tendency towards mutual exclusivity
MAOA	PGR	0.137	0.786	Tendency towards co-occurrence
MAOB	MKI67	0.138	<-3	Tendency towards mutual exclusivity
LOX	MKI67	0.188	-0.823	Tendency towards mutual exclusivity
MAOA	MKI67	0.229	-1.074	Tendency towards mutual exclusivity
LOX	AOC3	0.242	0.634	Tendency towards co-occurrence
AOC3	ESR1	0.273	<-3	Tendency towards mutual exclusivity
LOX	ERBB2	0.288	-0.318	Tendency towards mutual exclusivity
LOX	MAOA	0.379	-0.77	Tendency towards mutual exclusivity
LOX	PGR	0.379	-0.494	Tendency towards mutual exclusivity
MKI67	ERBB2	0.45	-0.109	Tendency towards mutual exclusivity
AOC3	PGR	0.51	0.192	Tendency towards co-occurrence
AOC3	MAOB	0.544	0.288	Tendency towards co-occurrence
LOX	MAOB	0.577	-0.381	Tendency towards mutual exclusivity
MAOB	PGR	0.586	-0.361	Tendency towards mutual exclusivity
ESR1	PGR	0.593	-0.152	Tendency towards mutual exclusivity
MAOA	MAOB	0.612	0.093	Tendency towards co-occurrence
MAOB	ERBB2	0.619	-0.015	Tendency towards mutual exclusivity
MAOB	ESR1	0.719	-0.046	Tendency towards mutual exclusivity

## Sheet: STRINGenrichment.Process(1)
#pathway ID	pathway description	observed gene count	false discovery rate	matching proteins in your network (IDs)	matching proteins in your network (labels)
GO.0014070	response to organic cyclic compound	17	5.3e-14	ENSP00000206249,ENSP00000227507,ENSP00000231004,ENSP00000256078,ENSP00000257904,ENSP00000262320,ENSP00000266970,ENSP00000270202,ENSP00000275493,ENSP00000302625,ENSP00000320940,ENSP00000325120,ENSP00000344456,ENSP00000357643,ENSP00000363822,ENSP00000367309,ENSP00000401303	AKT1,AR,AXIN1,AXIN2,CCND1,CDK2,CDK4,CTNNB1,EGFR,ESR1,KRAS,LOX,MAOB,MKI67,NCOA1,PGR,SHC1
GO.0048513	organ development	23	1.52e-13	ENSP00000206249,ENSP00000227507,ENSP00000231004,ENSP00000256078,ENSP00000257430,ENSP00000257904,ENSP00000262320,ENSP00000263967,ENSP00000265171,ENSP00000266970,ENSP00000268712,ENSP00000269571,ENSP00000275493,ENSP00000302625,ENSP00000309845,ENSP00000320940,ENSP00000325120,ENSP00000339007,ENSP00000344456,ENSP00000357643,ENSP00000363822,ENSP00000367309,ENSP00000401303	APC,AR,AXIN1,AXIN2,CCND1,CDK2,CDK4,CTNNB1,EGF,EGFR,ERBB2,ESR1,GRB2,HRAS,KRAS,LOX,MAOB,MKI67,NCOA1,NCOR1,PGR,PIK3CA,SHC1
GO.0048545	response to steroid hormone	13	3.79e-12	ENSP00000206249,ENSP00000227507,ENSP00000231004,ENSP00000256078,ENSP00000257904,ENSP00000266970,ENSP00000275493,ENSP00000320940,ENSP00000325120,ENSP00000344456,ENSP00000363822,ENSP00000367309,ENSP00000401303	AR,CCND1,CDK2,CDK4,CTNNB1,EGFR,ESR1,KRAS,LOX,MAOB,NCOA1,PGR,SHC1
GO.0010604	positive regulation of macromolecule metabolic process	21	4.4e-11	ENSP00000206249,ENSP00000227507,ENSP00000256078,ENSP00000257430,ENSP00000257904,ENSP00000262320,ENSP00000263967,ENSP00000265734,ENSP00000266970,ENSP00000268712,ENSP00000269571,ENSP00000270202,ENSP00000275493,ENSP00000302625,ENSP00000309845,ENSP00000320940,ENSP00000325120,ENSP00000344456,ENSP00000363822,ENSP00000399968,ENSP00000401303	AKT1,APC,AR,AXIN1,AXIN2,CCND1,CDK2,CDK4,CDK6,CTNNB1,EGFR,ERBB2,ESR1,HRAS,KRAS,NCOA1,NCOA2,NCOR1,PGR,PIK3CA,SHC1
GO.0009725	response to hormone	15	4.48e-11	ENSP00000206249,ENSP00000227507,ENSP00000231004,ENSP00000257904,ENSP00000263967,ENSP00000266970,ENSP00000270202,ENSP00000275493,ENSP00000309845,ENSP00000325120,ENSP00000344456,ENSP00000363822,ENSP00000367309,ENSP00000399968,ENSP00000401303	AKT1,AR,CCND1,CDK2,CDK4,CTNNB1,EGFR,ESR1,HRAS,LOX,MAOB,NCOA2,PGR,PIK3CA,SHC1
GO.0009719	response to endogenous stimulus	17	8.49e-11	ENSP00000206249,ENSP00000227507,ENSP00000231004,ENSP00000257904,ENSP00000263967,ENSP00000265171,ENSP00000266970,ENSP00000268712,ENSP00000269571,ENSP00000270202,ENSP00000309845,ENSP00000325120,ENSP00000344456,ENSP00000363822,ENSP00000367309,ENSP00000399968,ENSP00000401303	AKT1,AR,CCND1,CDK2,CDK4,CTNNB1,EGF,ERBB2,ESR1,HRAS,LOX,MAOB,NCOA2,NCOR1,PGR,PIK3CA,SHC1
GO.0033993	response to lipid	14	2.34e-10	ENSP00000206249,ENSP00000227507,ENSP00000231004,ENSP00000256078,ENSP00000257904,ENSP00000266970,ENSP00000270202,ENSP00000275493,ENSP00000320940,ENSP00000325120,ENSP00000344456,ENSP00000363822,ENSP00000367309,ENSP00000401303	AKT1,AR,CCND1,CDK2,CDK4,CTNNB1,EGFR,ESR1,KRAS,LOX,MAOB,NCOA1,PGR,SHC1
GO.0009893	positive regulation of metabolic process	22	2.6e-10	ENSP00000206249,ENSP00000227507,ENSP00000256078,ENSP00000257430,ENSP00000257904,ENSP00000262320,ENSP00000265734,ENSP00000266970,ENSP00000268712,ENSP00000269571,ENSP00000270202,ENSP00000275493,ENSP00000302625,ENSP00000309845,ENSP00000320940,ENSP00000325120,ENSP00000339007,ENSP00000344456,ENSP00000363822,ENSP00000367309,ENSP00000399968,ENSP00000401303	AKT1,APC,AR,AXIN1,AXIN2,CCND1,CDK2,CDK4,CDK6,CTNNB1,EGFR,ERBB2,ESR1,GRB2,HRAS,KRAS,MAOB,NCOA1,NCOA2,NCOR1,PGR,SHC1
GO.0071495	cellular response to endogenous stimulus	15	2.6e-10	ENSP00000206249,ENSP00000256078,ENSP00000263967,ENSP00000265171,ENSP00000266970,ENSP00000268712,ENSP00000269571,ENSP00000270202,ENSP00000309845,ENSP00000320940,ENSP00000325120,ENSP00000344456,ENSP00000363822,ENSP00000399968,ENSP00000401303	AKT1,AR,CDK2,CTNNB1,EGF,ERBB2,ESR1,HRAS,KRAS,NCOA1,NCOA2,NCOR1,PGR,PIK3CA,SHC1
GO.0008543	fibroblast growth factor receptor signaling pathway	9	7.75e-10	ENSP00000256078,ENSP00000263967,ENSP00000265171,ENSP00000269571,ENSP00000270202,ENSP00000275493,ENSP00000309845,ENSP00000339007,ENSP00000401303	AKT1,EGF,EGFR,ERBB2,GRB2,HRAS,KRAS,PIK3CA,SHC1
GO.0038095	Fc-epsilon receptor signaling pathway	9	9.3e-10	ENSP00000256078,ENSP00000263967,ENSP00000265171,ENSP00000269571,ENSP00000270202,ENSP00000275493,ENSP00000309845,ENSP00000339007,ENSP00000401303	AKT1,EGF,EGFR,ERBB2,GRB2,HRAS,KRAS,PIK3CA,SHC1
GO.0031325	positive regulation of cellular metabolic process	20	1.01e-09	ENSP00000206249,ENSP00000227507,ENSP00000256078,ENSP00000257904,ENSP00000262320,ENSP00000266970,ENSP00000268712,ENSP00000269571,ENSP00000270202,ENSP00000275493,ENSP00000302625,ENSP00000309845,ENSP00000320940,ENSP00000325120,ENSP00000339007,ENSP00000344456,ENSP00000363822,ENSP00000367309,ENSP00000399968,ENSP00000401303	AKT1,AR,AXIN1,AXIN2,CCND1,CDK2,CDK4,CTNNB1,EGFR,ERBB2,ESR1,GRB2,HRAS,KRAS,MAOB,NCOA1,NCOA2,NCOR1,PGR,SHC1
GO.0032870	cellular response to hormone stimulus	12	1.15e-09	ENSP00000206249,ENSP00000256078,ENSP00000263967,ENSP00000266970,ENSP00000270202,ENSP00000275493,ENSP00000309845,ENSP00000320940,ENSP00000325120,ENSP00000363822,ENSP00000399968,ENSP00000401303	AKT1,AR,CDK2,EGFR,ESR1,HRAS,KRAS,NCOA1,NCOA2,PGR,PIK3CA,SHC1
GO.0051173	positive regulation of nitrogen compound metabolic process	17	1.15e-09	ENSP00000206249,ENSP00000256078,ENSP00000257904,ENSP00000262320,ENSP00000265171,ENSP00000266970,ENSP00000269571,ENSP00000270202,ENSP00000275493,ENSP00000309845,ENSP00000320940,ENSP00000325120,ENSP00000344456,ENSP00000363822,ENSP00000367309,ENSP00000399968,ENSP00000401303	AKT1,AR,AXIN1,CDK2,CDK4,CTNNB1,EGF,EGFR,ERBB2,ESR1,HRAS,KRAS,MAOB,NCOA1,NCOA2,PGR,SHC1
GO.0010033	response to organic substance	19	1.17e-09	ENSP00000206249,ENSP00000227507,ENSP00000231004,ENSP00000257904,ENSP00000262320,ENSP00000265171,ENSP00000266970,ENSP00000268712,ENSP00000269571,ENSP00000270202,ENSP00000302625,ENSP00000309845,ENSP00000325120,ENSP00000344456,ENSP00000357643,ENSP00000363822,ENSP00000367309,ENSP00000399968,ENSP00000401303	AKT1,AR,AXIN1,AXIN2,CCND1,CDK2,CDK4,CTNNB1,EGF,ERBB2,ESR1,HRAS,LOX,MAOB,MKI67,NCOA2,NCOR1,PGR,SHC1
GO.0048732	gland development	11	1.26e-09	ENSP00000206249,ENSP00000227507,ENSP00000257430,ENSP00000263967,ENSP00000265171,ENSP00000270202,ENSP00000275493,ENSP00000320940,ENSP00000325120,ENSP00000344456,ENSP00000363822	AKT1,APC,AR,CCND1,CTNNB1,EGF,EGFR,ESR1,NCOA1,PGR,PIK3CA
GO.0044344	cellular response to fibroblast growth factor stimulus	9	1.39e-09	ENSP00000256078,ENSP00000263967,ENSP00000265171,ENSP00000269571,ENSP00000270202,ENSP00000275493,ENSP00000309845,ENSP00000339007,ENSP00000401303	AKT1,EGF,EGFR,ERBB2,GRB2,HRAS,KRAS,PIK3CA,SHC1
GO.0042325	regulation of phosphorylation	15	2.56e-09	ENSP00000227507,ENSP00000256078,ENSP00000257904,ENSP00000262320,ENSP00000263967,ENSP00000268712,ENSP00000269571,ENSP00000270202,ENSP00000275493,ENSP00000302625,ENSP00000309845,ENSP00000339007,ENSP00000344456,ENSP00000363822,ENSP00000401303	AKT1,AR,AXIN1,AXIN2,CCND1,CDK4,CTNNB1,EGFR,ERBB2,GRB2,HRAS,KRAS,NCOR1,PIK3CA,SHC1
GO.0007173	epidermal growth factor receptor signaling pathway	9	2.64e-09	ENSP00000256078,ENSP00000263967,ENSP00000265171,ENSP00000269571,ENSP00000270202,ENSP00000275493,ENSP00000309845,ENSP00000339007,ENSP00000401303	AKT1,EGF,EGFR,ERBB2,GRB2,HRAS,KRAS,PIK3CA,SHC1
GO.0010557	positive regulation of macromolecule biosynthetic process	16	3.77e-09	ENSP00000206249,ENSP00000256078,ENSP00000257904,ENSP00000262320,ENSP00000265171,ENSP00000266970,ENSP00000269571,ENSP00000270202,ENSP00000275493,ENSP00000309845,ENSP00000320940,ENSP00000325120,ENSP00000344456,ENSP00000363822,ENSP00000399968,ENSP00000401303	AKT1,AR,AXIN1,CDK2,CDK4,CTNNB1,EGF,EGFR,ERBB2,ESR1,HRAS,KRAS,NCOA1,NCOA2,PGR,SHC1
GO.0010628	positive regulation of gene expression	16	6.36e-09	ENSP00000206249,ENSP00000256078,ENSP00000257904,ENSP00000262320,ENSP00000265171,ENSP00000265734,ENSP00000266970,ENSP00000269571,ENSP00000270202,ENSP00000275493,ENSP00000309845,ENSP00000320940,ENSP00000325120,ENSP00000344456,ENSP00000363822,ENSP00000399968	AKT1,AR,AXIN1,CDK2,CDK4,CDK6,CTNNB1,EGF,EGFR,ERBB2,ESR1,HRAS,KRAS,NCOA1,NCOA2,PGR
GO.0031328	positive regulation of cellular biosynthetic process	16	9.3e-09	ENSP00000206249,ENSP00000256078,ENSP00000257904,ENSP00000262320,ENSP00000265171,ENSP00000266970,ENSP00000269571,ENSP00000270202,ENSP00000275493,ENSP00000309845,ENSP00000320940,ENSP00000325120,ENSP00000344456,ENSP00000363822,ENSP00000399968,ENSP00000401303	AKT1,AR,AXIN1,CDK2,CDK4,CTNNB1,EGF,EGFR,ERBB2,ESR1,HRAS,KRAS,NCOA1,NCOA2,PGR,SHC1
GO.0001932	regulation of protein phosphorylation	14	1.28e-08	ENSP00000227507,ENSP00000256078,ENSP00000257904,ENSP00000262320,ENSP00000263967,ENSP00000268712,ENSP00000269571,ENSP00000270202,ENSP00000275493,ENSP00000302625,ENSP00000309845,ENSP00000339007,ENSP00000344456,ENSP00000401303	AKT1,AXIN1,AXIN2,CCND1,CDK4,CTNNB1,EGFR,ERBB2,GRB2,HRAS,KRAS,NCOR1,PIK3CA,SHC1
GO.0050678	regulation of epithelial cell proliferation	9	1.96e-08	ENSP00000227507,ENSP00000257430,ENSP00000265734,ENSP00000269571,ENSP00000270202,ENSP00000275493,ENSP00000309845,ENSP00000325120,ENSP00000344456	AKT1,APC,CCND1,CDK6,CTNNB1,EGFR,ERBB2,HRAS,PGR
GO.0060429	epithelium development	13	1.96e-08	ENSP00000206249,ENSP00000227507,ENSP00000256078,ENSP00000257430,ENSP00000262320,ENSP00000265171,ENSP00000265734,ENSP00000270202,ENSP00000275493,ENSP00000302625,ENSP00000325120,ENSP00000339007,ENSP00000344456	AKT1,APC,AXIN1,AXIN2,CCND1,CDK6,CTNNB1,EGF,EGFR,ESR1,GRB2,KRAS,PGR
GO.0071902	positive regulation of protein serine/threonine kinase activity	9	1.96e-08	ENSP00000227507,ENSP00000256078,ENSP00000262320,ENSP00000265171,ENSP00000269571,ENSP00000270202,ENSP00000275493,ENSP00000309845,ENSP00000401303	AKT1,AXIN1,CCND1,EGF,EGFR,ERBB2,HRAS,KRAS,SHC1
GO.0051171	regulation of nitrogen compound metabolic process	21	1.99e-08	ENSP00000206249,ENSP00000227507,ENSP00000256078,ENSP00000257430,ENSP00000257904,ENSP00000262320,ENSP00000263967,ENSP00000265171,ENSP00000266970,ENSP00000268712,ENSP00000269571,ENSP00000270202,ENSP00000275493,ENSP00000302625,ENSP00000309845,ENSP00000320940,ENSP00000344456,ENSP00000363822,ENSP00000367309,ENSP00000399968,ENSP00000401303	AKT1,APC,AR,AXIN1,AXIN2,CCND1,CDK2,CDK4,CTNNB1,EGF,EGFR,ERBB2,ESR1,HRAS,KRAS,MAOB,NCOA1,NCOA2,NCOR1,PIK3CA,SHC1
GO.0071310	cellular response to organic substance	16	1.99e-08	ENSP00000206249,ENSP00000227507,ENSP00000262320,ENSP00000265171,ENSP00000266970,ENSP00000268712,ENSP00000269571,ENSP00000270202,ENSP00000302625,ENSP00000309845,ENSP00000320940,ENSP00000325120,ENSP00000344456,ENSP00000363822,ENSP00000399968,ENSP00000401303	AKT1,AR,AXIN1,AXIN2,CCND1,CDK2,CTNNB1,EGF,ERBB2,ESR1,HRAS,NCOA1,NCOA2,NCOR1,PGR,SHC1
GO.0048011	neurotrophin TRK receptor signaling pathway	9	2.65e-08	ENSP00000256078,ENSP00000263967,ENSP00000265171,ENSP00000269571,ENSP00000270202,ENSP00000275493,ENSP00000309845,ENSP00000339007,ENSP00000401303	AKT1,EGF,EGFR,ERBB2,GRB2,HRAS,KRAS,PIK3CA,SHC1
GO.0006468	protein phosphorylation	12	3.04e-08	ENSP00000227507,ENSP00000256078,ENSP00000257904,ENSP00000262320,ENSP00000263967,ENSP00000265734,ENSP00000266970,ENSP00000269571,ENSP00000270202,ENSP00000275493,ENSP00000309845,ENSP00000401303	AKT1,AXIN1,CCND1,CDK2,CDK4,CDK6,EGFR,ERBB2,HRAS,KRAS,PIK3CA,SHC1
GO.0070887	cellular response to chemical stimulus	17	3.04e-08	ENSP00000206249,ENSP00000227507,ENSP00000262320,ENSP00000265171,ENSP00000268712,ENSP00000269571,ENSP00000270202,ENSP00000302625,ENSP00000309845,ENSP00000320940,ENSP00000325120,ENSP00000340684,ENSP00000344456,ENSP00000363822,ENSP00000367309,ENSP00000399968,ENSP00000401303	AKT1,AR,AXIN1,AXIN2,CCND1,CTNNB1,EGF,ERBB2,ESR1,HRAS,MAOA,MAOB,NCOA1,NCOA2,NCOR1,PGR,SHC1
GO.0071900	regulation of protein serine/threonine kinase activity	10	3.04e-08	ENSP00000227507,ENSP00000256078,ENSP00000257430,ENSP00000262320,ENSP00000265171,ENSP00000269571,ENSP00000270202,ENSP00000275493,ENSP00000309845,ENSP00000401303	AKT1,APC,AXIN1,CCND1,EGF,EGFR,ERBB2,HRAS,KRAS,SHC1
GO.0042327	positive regulation of phosphorylation	12	4.75e-08	ENSP00000227507,ENSP00000256078,ENSP00000262320,ENSP00000263967,ENSP00000269571,ENSP00000270202,ENSP00000275493,ENSP00000302625,ENSP00000309845,ENSP00000344456,ENSP00000363822,ENSP00000401303	AKT1,AR,AXIN1,AXIN2,CCND1,CTNNB1,EGFR,ERBB2,HRAS,KRAS,PIK3CA,SHC1
GO.0045935	positive regulation of nucleobase-containing compound metabolic process	15	5.52e-08	ENSP00000206249,ENSP00000256078,ENSP00000262320,ENSP00000265171,ENSP00000266970,ENSP00000269571,ENSP00000270202,ENSP00000275493,ENSP00000309845,ENSP00000320940,ENSP00000325120,ENSP00000344456,ENSP00000363822,ENSP00000399968,ENSP00000401303	AKT1,AR,AXIN1,CDK2,CTNNB1,EGF,EGFR,ERBB2,ESR1,HRAS,KRAS,NCOA1,NCOA2,PGR,SHC1
GO.0051247	positive regulation of protein metabolic process	14	7.1e-08	ENSP00000227507,ENSP00000256078,ENSP00000257430,ENSP00000257904,ENSP00000262320,ENSP00000263967,ENSP00000268712,ENSP00000269571,ENSP00000270202,ENSP00000275493,ENSP00000302625,ENSP00000309845,ENSP00000344456,ENSP00000401303	AKT1,APC,AXIN1,AXIN2,CCND1,CDK4,CTNNB1,EGFR,ERBB2,HRAS,KRAS,NCOR1,PIK3CA,SHC1
GO.0045893	positive regulation of transcription, DNA-templated	14	8.2e-08	ENSP00000206249,ENSP00000256078,ENSP00000262320,ENSP00000265171,ENSP00000266970,ENSP00000269571,ENSP00000270202,ENSP00000275493,ENSP00000309845,ENSP00000320940,ENSP00000325120,ENSP00000344456,ENSP00000363822,ENSP00000399968	AKT1,AR,AXIN1,CDK2,CTNNB1,EGF,EGFR,ERBB2,ESR1,HRAS,KRAS,NCOA1,NCOA2,PGR
GO.0051338	regulation of transferase activity	12	8.2e-08	ENSP00000227507,ENSP00000257430,ENSP00000257904,ENSP00000262320,ENSP00000263967,ENSP00000266970,ENSP00000269571,ENSP00000270202,ENSP00000275493,ENSP00000309845,ENSP00000344456,ENSP00000401303	AKT1,APC,AXIN1,CCND1,CDK2,CDK4,CTNNB1,EGFR,ERBB2,HRAS,PIK3CA,SHC1
GO.0065009	regulation of molecular function	17	2.8e-07	ENSP00000206249,ENSP00000227507,ENSP00000257430,ENSP00000257904,ENSP00000262320,ENSP00000263967,ENSP00000266970,ENSP00000268712,ENSP00000269571,ENSP00000270202,ENSP00000275493,ENSP00000302625,ENSP00000309845,ENSP00000344456,ENSP00000363822,ENSP00000399968,ENSP00000401303	AKT1,APC,AR,AXIN1,AXIN2,CCND1,CDK2,CDK4,CTNNB1,EGFR,ERBB2,ESR1,HRAS,NCOA2,NCOR1,PIK3CA,SHC1
GO.0031399	regulation of protein modification process	14	3.09e-07	ENSP00000227507,ENSP00000256078,ENSP00000257904,ENSP00000262320,ENSP00000263967,ENSP00000266970,ENSP00000269571,ENSP00000270202,ENSP00000275493,ENSP00000302625,ENSP00000309845,ENSP00000339007,ENSP00000344456,ENSP00000401303	AKT1,AXIN1,AXIN2,CCND1,CDK2,CDK4,CTNNB1,EGFR,ERBB2,GRB2,HRAS,KRAS,PIK3CA,SHC1
GO.0032270	positive regulation of cellular protein metabolic process	13	3.48e-07	ENSP00000227507,ENSP00000256078,ENSP00000257904,ENSP00000262320,ENSP00000263967,ENSP00000268712,ENSP00000269571,ENSP00000270202,ENSP00000275493,ENSP00000302625,ENSP00000309845,ENSP00000344456,ENSP00000401303	AKT1,AXIN1,AXIN2,CCND1,CDK4,CTNNB1,EGFR,ERBB2,HRAS,KRAS,NCOR1,PIK3CA,SHC1
GO.0048519	negative regulation of biological process	20	3.84e-07	ENSP00000206249,ENSP00000256078,ENSP00000257904,ENSP00000262320,ENSP00000265171,ENSP00000265734,ENSP00000266970,ENSP00000268712,ENSP00000269571,ENSP00000270202,ENSP00000275493,ENSP00000302625,ENSP00000309845,ENSP00000320940,ENSP00000325120,ENSP00000339007,ENSP00000344456,ENSP00000363822,ENSP00000367309,ENSP00000399968	AKT1,AR,AXIN1,AXIN2,CDK2,CDK4,CDK6,CTNNB1,EGF,EGFR,ERBB2,ESR1,GRB2,HRAS,KRAS,MAOB,NCOA1,NCOA2,NCOR1,PGR
GO.0048608	reproductive structure development	9	3.9e-07	ENSP00000206249,ENSP00000227507,ENSP00000270202,ENSP00000275493,ENSP00000320940,ENSP00000325120,ENSP00000339007,ENSP00000344456,ENSP00000363822	AKT1,AR,CCND1,CTNNB1,EGFR,ESR1,GRB2,NCOA1,PGR
GO.0001934	positive regulation of protein phosphorylation	11	3.98e-07	ENSP00000227507,ENSP00000256078,ENSP00000262320,ENSP00000263967,ENSP00000269571,ENSP00000270202,ENSP00000275493,ENSP00000302625,ENSP00000309845,ENSP00000344456,ENSP00000401303	AKT1,AXIN1,AXIN2,CCND1,CTNNB1,EGFR,ERBB2,HRAS,KRAS,PIK3CA,SHC1
GO.0031401	positive regulation of protein modification process	12	3.98e-07	ENSP00000227507,ENSP00000256078,ENSP00000262320,ENSP00000263967,ENSP00000268712,ENSP00000269571,ENSP00000270202,ENSP00000275493,ENSP00000302625,ENSP00000309845,ENSP00000344456,ENSP00000401303	AKT1,AXIN1,AXIN2,CCND1,CTNNB1,EGFR,ERBB2,HRAS,KRAS,NCOR1,PIK3CA,SHC1
GO.0061458	reproductive system development	9	4.05e-07	ENSP00000206249,ENSP00000227507,ENSP00000270202,ENSP00000275493,ENSP00000320940,ENSP00000325120,ENSP00000339007,ENSP00000344456,ENSP00000363822	AKT1,AR,CCND1,CTNNB1,EGFR,ESR1,GRB2,NCOA1,PGR
GO.0043408	regulation of MAPK cascade	10	4.6e-07	ENSP00000257430,ENSP00000262320,ENSP00000268712,ENSP00000269571,ENSP00000270202,ENSP00000275493,ENSP00000309845,ENSP00000339007,ENSP00000344456,ENSP00000401303	AKT1,APC,AXIN1,CTNNB1,EGFR,ERBB2,GRB2,HRAS,NCOR1,SHC1
GO.0048522	positive regulation of cellular process	20	5.35e-07	ENSP00000227507,ENSP00000256078,ENSP00000257904,ENSP00000262320,ENSP00000265171,ENSP00000265734,ENSP00000268712,ENSP00000269571,ENSP00000270202,ENSP00000275493,ENSP00000302625,ENSP00000309845,ENSP00000320940,ENSP00000325120,ENSP00000339007,ENSP00000344456,ENSP00000363822,ENSP00000367309,ENSP00000399968,ENSP00000401303	AKT1,AR,AXIN1,AXIN2,CCND1,CDK4,CDK6,CTNNB1,EGF,EGFR,ERBB2,GRB2,HRAS,KRAS,MAOB,NCOA1,NCOA2,NCOR1,PGR,SHC1
GO.0048518	positive regulation of biological process	21	6.62e-07	ENSP00000227507,ENSP00000256078,ENSP00000257430,ENSP00000257904,ENSP00000262320,ENSP00000265171,ENSP00000265734,ENSP00000268712,ENSP00000269571,ENSP00000270202,ENSP00000275493,ENSP00000302625,ENSP00000309845,ENSP00000320940,ENSP00000325120,ENSP00000339007,ENSP00000344456,ENSP00000363822,ENSP00000367309,ENSP00000399968,ENSP00000401303	AKT1,APC,AR,AXIN1,AXIN2,CCND1,CDK4,CDK6,CTNNB1,EGF,EGFR,ERBB2,GRB2,HRAS,KRAS,MAOB,NCOA1,NCOA2,NCOR1,PGR,SHC1
GO.0071363	cellular response to growth factor stimulus	10	7.2e-07	ENSP00000256078,ENSP00000263967,ENSP00000265171,ENSP00000268712,ENSP00000269571,ENSP00000275493,ENSP00000309845,ENSP00000339007,ENSP00000344456,ENSP00000401303	CTNNB1,EGF,EGFR,ERBB2,GRB2,HRAS,KRAS,NCOR1,PIK3CA,SHC1
GO.0048523	negative regulation of cellular process	19	8.9e-07	ENSP00000206249,ENSP00000256078,ENSP00000257904,ENSP00000262320,ENSP00000265171,ENSP00000265734,ENSP00000266970,ENSP00000268712,ENSP00000269571,ENSP00000270202,ENSP00000275493,ENSP00000302625,ENSP00000309845,ENSP00000320940,ENSP00000339007,ENSP00000344456,ENSP00000363822,ENSP00000367309,ENSP00000399968	AKT1,AR,AXIN1,AXIN2,CDK2,CDK4,CDK6,CTNNB1,EGF,EGFR,ERBB2,ESR1,GRB2,HRAS,KRAS,MAOB,NCOA1,NCOA2,NCOR1
GO.0097305	response to alcohol	8	1.05e-06	ENSP00000206249,ENSP00000227507,ENSP00000257904,ENSP00000266970,ENSP00000275493,ENSP00000320940,ENSP00000344456,ENSP00000367309	CCND1,CDK2,CDK4,CTNNB1,EGFR,ESR1,MAOB,NCOA1
GO.0008283	cell proliferation	10	1.14e-06	ENSP00000206249,ENSP00000227507,ENSP00000269571,ENSP00000270202,ENSP00000275493,ENSP00000302625,ENSP00000309845,ENSP00000344456,ENSP00000357643,ENSP00000363822	AKT1,AR,AXIN2,CCND1,CTNNB1,EGFR,ERBB2,ESR1,HRAS,MKI67
GO.0050878	regulation of body fluid levels	10	1.17e-06	ENSP00000227507,ENSP00000256078,ENSP00000263967,ENSP00000265171,ENSP00000266970,ENSP00000270202,ENSP00000309845,ENSP00000320940,ENSP00000339007,ENSP00000401303	AKT1,CCND1,CDK2,EGF,GRB2,HRAS,KRAS,NCOA1,PIK3CA,SHC1
GO.0045859	regulation of protein kinase activity	10	1.24e-06	ENSP00000227507,ENSP00000257430,ENSP00000257904,ENSP00000262320,ENSP00000263967,ENSP00000269571,ENSP00000270202,ENSP00000275493,ENSP00000309845,ENSP00000401303	AKT1,APC,AXIN1,CCND1,CDK4,EGFR,ERBB2,HRAS,PIK3CA,SHC1
GO.0042060	wound healing	10	1.28e-06	ENSP00000231004,ENSP00000256078,ENSP00000263967,ENSP00000265171,ENSP00000266970,ENSP00000269571,ENSP00000270202,ENSP00000309845,ENSP00000339007,ENSP00000401303	AKT1,CDK2,EGF,ERBB2,GRB2,HRAS,KRAS,LOX,PIK3CA,SHC1
GO.0043406	positive regulation of MAP kinase activity	7	1.41e-06	ENSP00000256078,ENSP00000262320,ENSP00000265171,ENSP00000269571,ENSP00000275493,ENSP00000309845,ENSP00000401303	AXIN1,EGF,EGFR,ERBB2,HRAS,KRAS,SHC1
GO.0050790	regulation of catalytic activity	15	1.41e-06	ENSP00000206249,ENSP00000227507,ENSP00000257430,ENSP00000257904,ENSP00000262320,ENSP00000263967,ENSP00000266970,ENSP00000268712,ENSP00000269571,ENSP00000270202,ENSP00000275493,ENSP00000302625,ENSP00000309845,ENSP00000344456,ENSP00000401303	AKT1,APC,AXIN1,AXIN2,CCND1,CDK2,CDK4,CTNNB1,EGFR,ERBB2,ESR1,HRAS,NCOR1,PIK3CA,SHC1
GO.0048731	system development	18	1.52e-06	ENSP00000206249,ENSP00000227507,ENSP00000231004,ENSP00000257430,ENSP00000257904,ENSP00000262320,ENSP00000265734,ENSP00000266970,ENSP00000268712,ENSP00000302625,ENSP00000309845,ENSP00000320940,ENSP00000325120,ENSP00000344456,ENSP00000357643,ENSP00000363822,ENSP00000367309,ENSP00000401303	APC,AR,AXIN1,AXIN2,CCND1,CDK2,CDK4,CDK6,CTNNB1,ESR1,HRAS,LOX,MAOB,MKI67,NCOA1,NCOR1,PGR,SHC1
GO.0044710	single-organism metabolic process	19	2.18e-06	ENSP00000206249,ENSP00000231004,ENSP00000256078,ENSP00000257430,ENSP00000262320,ENSP00000263967,ENSP00000265171,ENSP00000266970,ENSP00000268712,ENSP00000269571,ENSP00000270202,ENSP00000275493,ENSP00000302625,ENSP00000309845,ENSP00000312326,ENSP00000339007,ENSP00000340684,ENSP00000367309,ENSP00000401303	AKT1,AOC3,APC,AXIN1,AXIN2,CDK2,EGF,EGFR,ERBB2,ESR1,GRB2,HRAS,KRAS,LOX,MAOA,MAOB,NCOR1,PIK3CA,SHC1
GO.0071407	cellular response to organic cyclic compound	8	2.18e-06	ENSP00000206249,ENSP00000262320,ENSP00000270202,ENSP00000275493,ENSP00000302625,ENSP00000325120,ENSP00000344456,ENSP00000363822	AKT1,AR,AXIN1,AXIN2,CTNNB1,EGFR,ESR1,PGR
GO.0030879	mammary gland development	6	2.35e-06	ENSP00000206249,ENSP00000227507,ENSP00000265171,ENSP00000270202,ENSP00000320940,ENSP00000325120	AKT1,CCND1,EGF,ESR1,NCOA1,PGR
GO.0032355	response to estradiol	6	2.35e-06	ENSP00000206249,ENSP00000227507,ENSP00000266970,ENSP00000275493,ENSP00000320940,ENSP00000344456	CCND1,CDK2,CTNNB1,EGFR,ESR1,NCOA1
GO.0010556	regulation of macromolecule biosynthetic process	18	3.01e-06	ENSP00000206249,ENSP00000227507,ENSP00000256078,ENSP00000257904,ENSP00000262320,ENSP00000265171,ENSP00000266970,ENSP00000268712,ENSP00000269571,ENSP00000270202,ENSP00000275493,ENSP00000302625,ENSP00000309845,ENSP00000320940,ENSP00000344456,ENSP00000363822,ENSP00000399968,ENSP00000401303	AKT1,AR,AXIN1,AXIN2,CCND1,CDK2,CDK4,CTNNB1,EGF,EGFR,ERBB2,ESR1,HRAS,KRAS,NCOA1,NCOA2,NCOR1,SHC1
GO.0019219	regulation of nucleobase-containing compound metabolic process	18	3.01e-06	ENSP00000206249,ENSP00000227507,ENSP00000256078,ENSP00000262320,ENSP00000263967,ENSP00000265171,ENSP00000266970,ENSP00000268712,ENSP00000269571,ENSP00000270202,ENSP00000275493,ENSP00000302625,ENSP00000309845,ENSP00000320940,ENSP00000344456,ENSP00000363822,ENSP00000399968,ENSP00000401303	AKT1,AR,AXIN1,AXIN2,CCND1,CDK2,CTNNB1,EGF,EGFR,ERBB2,ESR1,HRAS,KRAS,NCOA1,NCOA2,NCOR1,PIK3CA,SHC1
GO.0035412	regulation of catenin import into nucleus	4	3.32e-06	ENSP00000262320,ENSP00000265171,ENSP00000275493,ENSP00000302625	AXIN1,AXIN2,EGF,EGFR
GO.0045740	positive regulation of DNA replication	5	3.32e-06	ENSP00000266970,ENSP00000275493,ENSP00000309845,ENSP00000344456,ENSP00000401303	CDK2,CTNNB1,EGFR,HRAS,SHC1
GO.0051347	positive regulation of transferase activity	9	3.67e-06	ENSP00000227507,ENSP00000262320,ENSP00000263967,ENSP00000269571,ENSP00000270202,ENSP00000275493,ENSP00000309845,ENSP00000344456,ENSP00000401303	AKT1,AXIN1,CCND1,CTNNB1,EGFR,ERBB2,HRAS,PIK3CA,SHC1
GO.0048015	phosphatidylinositol-mediated signaling	6	3.96e-06	ENSP00000263967,ENSP00000265171,ENSP00000269571,ENSP00000270202,ENSP00000275493,ENSP00000339007	AKT1,EGF,EGFR,ERBB2,GRB2,PIK3CA
GO.0023014	signal transduction by protein phosphorylation	7	4.14e-06	ENSP00000256078,ENSP00000262320,ENSP00000265171,ENSP00000269571,ENSP00000275493,ENSP00000309845,ENSP00000401303	AXIN1,EGF,EGFR,ERBB2,HRAS,KRAS,SHC1
GO.0008284	positive regulation of cell proliferation	10	4.18e-06	ENSP00000206249,ENSP00000227507,ENSP00000256078,ENSP00000257904,ENSP00000265734,ENSP00000266970,ENSP00000269571,ENSP00000270202,ENSP00000309845,ENSP00000363822	AKT1,AR,CCND1,CDK2,CDK4,CDK6,ERBB2,ESR1,HRAS,KRAS
GO.0044093	positive regulation of molecular function	13	4.66e-06	ENSP00000206249,ENSP00000227507,ENSP00000262320,ENSP00000263967,ENSP00000269571,ENSP00000270202,ENSP00000275493,ENSP00000302625,ENSP00000309845,ENSP00000344456,ENSP00000363822,ENSP00000399968,ENSP00000401303	AKT1,AR,AXIN1,AXIN2,CCND1,CTNNB1,EGFR,ERBB2,ESR1,HRAS,NCOA2,PIK3CA,SHC1
GO.0030518	intracellular steroid hormone receptor signaling pathway	5	5.63e-06	ENSP00000206249,ENSP00000320940,ENSP00000325120,ENSP00000344456,ENSP00000363822	AR,CTNNB1,ESR1,NCOA1,PGR
GO.0050679	positive regulation of epithelial cell proliferation	6	5.63e-06	ENSP00000227507,ENSP00000269571,ENSP00000270202,ENSP00000275493,ENSP00000309845,ENSP00000344456	AKT1,CCND1,CTNNB1,EGFR,ERBB2,HRAS
GO.0031326	regulation of cellular biosynthetic process	18	5.65e-06	ENSP00000206249,ENSP00000227507,ENSP00000256078,ENSP00000257904,ENSP00000262320,ENSP00000265171,ENSP00000266970,ENSP00000268712,ENSP00000269571,ENSP00000270202,ENSP00000275493,ENSP00000302625,ENSP00000309845,ENSP00000320940,ENSP00000344456,ENSP00000363822,ENSP00000399968,ENSP00000401303	AKT1,AR,AXIN1,AXIN2,CCND1,CDK2,CDK4,CTNNB1,EGF,EGFR,ERBB2,ESR1,HRAS,KRAS,NCOA1,NCOA2,NCOR1,SHC1
GO.0070141	response to UV-A	3	6.58e-06	ENSP00000227507,ENSP00000270202,ENSP00000275493	AKT1,CCND1,EGFR
GO.0031100	organ regeneration	5	6.6e-06	ENSP00000227507,ENSP00000257904,ENSP00000266970,ENSP00000357643,ENSP00000401303	CCND1,CDK2,CDK4,MKI67,SHC1
GO.0001775	cell activation	9	7.14e-06	ENSP00000257430,ENSP00000263967,ENSP00000265171,ENSP00000265734,ENSP00000268712,ENSP00000270202,ENSP00000339007,ENSP00000344456,ENSP00000401303	AKT1,APC,CDK6,CTNNB1,EGF,GRB2,NCOR1,PIK3CA,SHC1
GO.0045860	positive regulation of protein kinase activity	8	7.14e-06	ENSP00000227507,ENSP00000262320,ENSP00000263967,ENSP00000269571,ENSP00000270202,ENSP00000275493,ENSP00000309845,ENSP00000401303	AKT1,AXIN1,CCND1,EGFR,ERBB2,HRAS,PIK3CA,SHC1
GO.0002009	morphogenesis of an epithelium	8	8.28e-06	ENSP00000206249,ENSP00000256078,ENSP00000262320,ENSP00000265171,ENSP00000275493,ENSP00000325120,ENSP00000339007,ENSP00000344456	AXIN1,CTNNB1,EGF,EGFR,ESR1,GRB2,KRAS,PGR
GO.0051052	regulation of DNA metabolic process	7	8.36e-06	ENSP00000263967,ENSP00000266970,ENSP00000275493,ENSP00000302625,ENSP00000309845,ENSP00000344456,ENSP00000401303	AXIN2,CDK2,CTNNB1,EGFR,HRAS,PIK3CA,SHC1
GO.0042127	regulation of cell proliferation	12	9.35e-06	ENSP00000206249,ENSP00000227507,ENSP00000256078,ENSP00000257904,ENSP00000265734,ENSP00000266970,ENSP00000270202,ENSP00000302625,ENSP00000309845,ENSP00000325120,ENSP00000344456,ENSP00000363822	AKT1,AR,AXIN2,CCND1,CDK2,CDK4,CDK6,CTNNB1,ESR1,HRAS,KRAS,PGR
GO.0048145	regulation of fibroblast proliferation	5	9.79e-06	ENSP00000206249,ENSP00000257904,ENSP00000265734,ENSP00000275493,ENSP00000344456	CDK4,CDK6,CTNNB1,EGFR,ESR1
GO.0060255	regulation of macromolecule metabolic process	20	1.08e-05	ENSP00000206249,ENSP00000227507,ENSP00000256078,ENSP00000257430,ENSP00000257904,ENSP00000262320,ENSP00000263967,ENSP00000265734,ENSP00000268712,ENSP00000269571,ENSP00000270202,ENSP00000275493,ENSP00000302625,ENSP00000309845,ENSP00000320940,ENSP00000339007,ENSP00000344456,ENSP00000363822,ENSP00000399968,ENSP00000401303	AKT1,APC,AR,AXIN1,AXIN2,CCND1,CDK4,CDK6,CTNNB1,EGFR,ERBB2,ESR1,GRB2,HRAS,KRAS,NCOA1,NCOA2,NCOR1,PIK3CA,SHC1
GO.0044260	cellular macromolecule metabolic process	22	1.09e-05	ENSP00000206249,ENSP00000227507,ENSP00000231004,ENSP00000256078,ENSP00000257430,ENSP00000257904,ENSP00000263967,ENSP00000265734,ENSP00000266970,ENSP00000268712,ENSP00000269571,ENSP00000275493,ENSP00000302625,ENSP00000309845,ENSP00000320940,ENSP00000325120,ENSP00000339007,ENSP00000344456,ENSP00000357643,ENSP00000363822,ENSP00000399968,ENSP00000401303	APC,AR,AXIN2,CCND1,CDK2,CDK4,CDK6,CTNNB1,EGFR,ERBB2,ESR1,GRB2,HRAS,KRAS,LOX,MKI67,NCOA1,NCOA2,NCOR1,PGR,PIK3CA,SHC1
GO.0000082	G1/S transition of mitotic cell cycle	6	1.19e-05	ENSP00000227507,ENSP00000257904,ENSP00000265734,ENSP00000266970,ENSP00000270202,ENSP00000275493	AKT1,CCND1,CDK2,CDK4,CDK6,EGFR
GO.0061138	morphogenesis of a branching epithelium	6	1.27e-05	ENSP00000206249,ENSP00000256078,ENSP00000265171,ENSP00000325120,ENSP00000339007,ENSP00000344456	CTNNB1,EGF,ESR1,GRB2,KRAS,PGR
GO.0045087	innate immune response	10	1.4e-05	ENSP00000256078,ENSP00000263967,ENSP00000265171,ENSP00000269571,ENSP00000270202,ENSP00000275493,ENSP00000309845,ENSP00000339007,ENSP00000344456,ENSP00000401303	AKT1,CTNNB1,EGF,EGFR,ERBB2,GRB2,HRAS,KRAS,PIK3CA,SHC1
GO.2000112	regulation of cellular macromolecule biosynthetic process	17	1.42e-05	ENSP00000206249,ENSP00000227507,ENSP00000256078,ENSP00000257904,ENSP00000262320,ENSP00000265171,ENSP00000266970,ENSP00000268712,ENSP00000269571,ENSP00000270202,ENSP00000275493,ENSP00000302625,ENSP00000309845,ENSP00000320940,ENSP00000344456,ENSP00000363822,ENSP00000401303	AKT1,AR,AXIN1,AXIN2,CCND1,CDK2,CDK4,CTNNB1,EGF,EGFR,ERBB2,ESR1,HRAS,KRAS,NCOA1,NCOR1,SHC1
GO.0009888	tissue development	12	1.51e-05	ENSP00000206249,ENSP00000227507,ENSP00000256078,ENSP00000257430,ENSP00000262320,ENSP00000263967,ENSP00000265171,ENSP00000265734,ENSP00000275493,ENSP00000325120,ENSP00000339007,ENSP00000344456	APC,AXIN1,CCND1,CDK6,CTNNB1,EGF,EGFR,ESR1,GRB2,KRAS,PGR,PIK3CA
GO.0071417	cellular response to organonitrogen compound	8	1.53e-05	ENSP00000256078,ENSP00000263967,ENSP00000266970,ENSP00000270202,ENSP00000275493,ENSP00000309845,ENSP00000344456,ENSP00000401303	AKT1,CDK2,CTNNB1,EGFR,HRAS,KRAS,PIK3CA,SHC1
GO.0044772	mitotic cell cycle phase transition	7	1.54e-05	ENSP00000227507,ENSP00000257430,ENSP00000257904,ENSP00000265734,ENSP00000266970,ENSP00000270202,ENSP00000275493	AKT1,APC,CCND1,CDK2,CDK4,CDK6,EGFR
GO.0051726	regulation of cell cycle	10	1.54e-05	ENSP00000227507,ENSP00000257904,ENSP00000265171,ENSP00000265734,ENSP00000266970,ENSP00000270202,ENSP00000275493,ENSP00000302625,ENSP00000309845,ENSP00000344456	AKT1,AXIN2,CCND1,CDK2,CDK4,CDK6,CTNNB1,EGF,EGFR,HRAS
GO.1903827	regulation of cellular protein localization	8	1.82e-05	ENSP00000257430,ENSP00000262320,ENSP00000265171,ENSP00000270202,ENSP00000275493,ENSP00000302625,ENSP00000344456,ENSP00000363822	AKT1,APC,AR,AXIN1,AXIN2,CTNNB1,EGF,EGFR
GO.0048468	cell development	12	2.14e-05	ENSP00000206249,ENSP00000256078,ENSP00000257430,ENSP00000262320,ENSP00000265734,ENSP00000270202,ENSP00000275493,ENSP00000309845,ENSP00000325120,ENSP00000339007,ENSP00000344456,ENSP00000401303	AKT1,APC,AXIN1,CDK6,CTNNB1,EGFR,ESR1,GRB2,HRAS,KRAS,PGR,SHC1
GO.0000165	MAPK cascade	6	2.29e-05	ENSP00000256078,ENSP00000262320,ENSP00000265171,ENSP00000275493,ENSP00000309845,ENSP00000401303	AXIN1,EGF,EGFR,HRAS,KRAS,SHC1
GO.0048585	negative regulation of response to stimulus	11	2.62e-05	ENSP00000206249,ENSP00000227507,ENSP00000262320,ENSP00000265171,ENSP00000265734,ENSP00000270202,ENSP00000275493,ENSP00000302625,ENSP00000339007,ENSP00000344456,ENSP00000363822	AKT1,AR,AXIN1,AXIN2,CCND1,CDK6,CTNNB1,EGF,EGFR,ESR1,GRB2
GO.1903506	regulation of nucleic acid-templated transcription	16	2.69e-05	ENSP00000206249,ENSP00000227507,ENSP00000256078,ENSP00000262320,ENSP00000265171,ENSP00000266970,ENSP00000268712,ENSP00000269571,ENSP00000270202,ENSP00000275493,ENSP00000302625,ENSP00000309845,ENSP00000320940,ENSP00000344456,ENSP00000363822,ENSP00000399968	AKT1,AR,AXIN1,AXIN2,CCND1,CDK2,CTNNB1,EGF,EGFR,ERBB2,ESR1,HRAS,KRAS,NCOA1,NCOA2,NCOR1
GO.0051246	regulation of protein metabolic process	14	2.71e-05	ENSP00000227507,ENSP00000256078,ENSP00000257430,ENSP00000262320,ENSP00000263967,ENSP00000266970,ENSP00000269571,ENSP00000270202,ENSP00000275493,ENSP00000302625,ENSP00000309845,ENSP00000339007,ENSP00000344456,ENSP00000401303	AKT1,APC,AXIN1,AXIN2,CCND1,CDK2,CTNNB1,EGFR,ERBB2,GRB2,HRAS,KRAS,PIK3CA,SHC1
GO.0007596	blood coagulation	8	2.83e-05	ENSP00000256078,ENSP00000263967,ENSP00000265171,ENSP00000266970,ENSP00000270202,ENSP00000309845,ENSP00000339007,ENSP00000401303	AKT1,CDK2,EGF,GRB2,HRAS,KRAS,PIK3CA,SHC1
GO.0048699	generation of neurons	11	2.86e-05	ENSP00000256078,ENSP00000257430,ENSP00000262320,ENSP00000265734,ENSP00000270202,ENSP00000275493,ENSP00000309845,ENSP00000320940,ENSP00000339007,ENSP00000344456,ENSP00000401303	AKT1,APC,AXIN1,CDK6,CTNNB1,EGFR,GRB2,HRAS,KRAS,NCOA1,SHC1
GO.0032869	cellular response to insulin stimulus	6	3.11e-05	ENSP00000256078,ENSP00000263967,ENSP00000266970,ENSP00000270202,ENSP00000309845,ENSP00000401303	AKT1,CDK2,HRAS,KRAS,PIK3CA,SHC1
GO.0050999	regulation of nitric-oxide synthase activity	4	3.17e-05	ENSP00000206249,ENSP00000256078,ENSP00000270202,ENSP00000275493	AKT1,EGFR,ESR1,KRAS
GO.0002682	regulation of immune system process	11	3.29e-05	ENSP00000256078,ENSP00000257430,ENSP00000263967,ENSP00000265171,ENSP00000265734,ENSP00000270202,ENSP00000275493,ENSP00000309845,ENSP00000339007,ENSP00000344456,ENSP00000401303	AKT1,APC,CDK6,CTNNB1,EGF,EGFR,GRB2,HRAS,KRAS,PIK3CA,SHC1
GO.0009968	negative regulation of signal transduction	10	3.37e-05	ENSP00000206249,ENSP00000227507,ENSP00000262320,ENSP00000265171,ENSP00000270202,ENSP00000275493,ENSP00000302625,ENSP00000339007,ENSP00000344456,ENSP00000363822	AKT1,AR,AXIN1,AXIN2,CCND1,CTNNB1,EGF,EGFR,ESR1,GRB2
GO.0010243	response to organonitrogen compound	9	3.37e-05	ENSP00000227507,ENSP00000256078,ENSP00000263967,ENSP00000266970,ENSP00000270202,ENSP00000275493,ENSP00000309845,ENSP00000344456,ENSP00000401303	AKT1,CCND1,CDK2,CTNNB1,EGFR,HRAS,KRAS,PIK3CA,SHC1
GO.0006950	response to stress	16	3.41e-05	ENSP00000231004,ENSP00000256078,ENSP00000257430,ENSP00000257904,ENSP00000262320,ENSP00000263967,ENSP00000265171,ENSP00000266970,ENSP00000269571,ENSP00000270202,ENSP00000275493,ENSP00000309845,ENSP00000312326,ENSP00000339007,ENSP00000344456,ENSP00000357643	AKT1,AOC3,APC,AXIN1,CDK2,CDK4,CTNNB1,EGF,EGFR,ERBB2,GRB2,HRAS,KRAS,LOX,MKI67,PIK3CA
GO.0010468	regulation of gene expression	17	3.41e-05	ENSP00000206249,ENSP00000227507,ENSP00000256078,ENSP00000257904,ENSP00000262320,ENSP00000265171,ENSP00000265734,ENSP00000266970,ENSP00000268712,ENSP00000269571,ENSP00000270202,ENSP00000275493,ENSP00000302625,ENSP00000309845,ENSP00000320940,ENSP00000344456,ENSP00000363822	AKT1,AR,AXIN1,AXIN2,CCND1,CDK2,CDK4,CDK6,CTNNB1,EGF,EGFR,ERBB2,ESR1,HRAS,KRAS,NCOA1,NCOR1
GO.0050793	regulation of developmental process	13	3.5e-05	ENSP00000206249,ENSP00000227507,ENSP00000256078,ENSP00000257430,ENSP00000262320,ENSP00000263967,ENSP00000265171,ENSP00000265734,ENSP00000268712,ENSP00000270202,ENSP00000302625,ENSP00000320940,ENSP00000344456	AKT1,APC,AXIN1,AXIN2,CCND1,CDK6,CTNNB1,EGF,ESR1,KRAS,NCOA1,NCOR1,PIK3CA
GO.0043085	positive regulation of catalytic activity	11	5e-05	ENSP00000206249,ENSP00000227507,ENSP00000262320,ENSP00000263967,ENSP00000269571,ENSP00000270202,ENSP00000275493,ENSP00000302625,ENSP00000309845,ENSP00000344456,ENSP00000401303	AKT1,AXIN1,AXIN2,CCND1,CTNNB1,EGFR,ERBB2,ESR1,HRAS,PIK3CA,SHC1
GO.0051716	cellular response to stimulus	20	5.02e-05	ENSP00000206249,ENSP00000257904,ENSP00000262320,ENSP00000265171,ENSP00000265734,ENSP00000266970,ENSP00000268712,ENSP00000269571,ENSP00000270202,ENSP00000302625,ENSP00000309845,ENSP00000320940,ENSP00000339007,ENSP00000340684,ENSP00000344456,ENSP00000357643,ENSP00000363822,ENSP00000367309,ENSP00000399968,ENSP00000401303	AKT1,AR,AXIN1,AXIN2,CDK2,CDK4,CDK6,CTNNB1,EGF,ERBB2,ESR1,GRB2,HRAS,MAOA,MAOB,MKI67,NCOA1,NCOA2,NCOR1,SHC1
GO.0007275	multicellular organismal development	17	5.46e-05	ENSP00000206249,ENSP00000227507,ENSP00000231004,ENSP00000257430,ENSP00000257904,ENSP00000265734,ENSP00000266970,ENSP00000268712,ENSP00000302625,ENSP00000309845,ENSP00000320940,ENSP00000325120,ENSP00000344456,ENSP00000357643,ENSP00000363822,ENSP00000367309,ENSP00000401303	APC,AR,AXIN2,CCND1,CDK2,CDK4,CDK6,CTNNB1,ESR1,HRAS,LOX,MAOB,MKI67,NCOA1,NCOR1,PGR,SHC1
GO.0048856	anatomical structure development	17	5.84e-05	ENSP00000206249,ENSP00000227507,ENSP00000231004,ENSP00000257430,ENSP00000257904,ENSP00000265734,ENSP00000266970,ENSP00000268712,ENSP00000302625,ENSP00000309845,ENSP00000320940,ENSP00000325120,ENSP00000344456,ENSP00000357643,ENSP00000363822,ENSP00000367309,ENSP00000401303	APC,AR,AXIN2,CCND1,CDK2,CDK4,CDK6,CTNNB1,ESR1,HRAS,LOX,MAOB,MKI67,NCOA1,NCOR1,PGR,SHC1
GO.0035556	intracellular signal transduction	12	6.7e-05	ENSP00000256078,ENSP00000262320,ENSP00000265171,ENSP00000266970,ENSP00000269571,ENSP00000275493,ENSP00000309845,ENSP00000339007,ENSP00000344456,ENSP00000363822,ENSP00000399968,ENSP00000401303	AR,AXIN1,CDK2,CTNNB1,EGF,EGFR,ERBB2,GRB2,HRAS,KRAS,NCOA2,SHC1
GO.0080090	regulation of primary metabolic process	19	6.7e-05	ENSP00000206249,ENSP00000227507,ENSP00000256078,ENSP00000257430,ENSP00000262320,ENSP00000263967,ENSP00000268712,ENSP00000269571,ENSP00000270202,ENSP00000275493,ENSP00000302625,ENSP00000309845,ENSP00000320940,ENSP00000339007,ENSP00000344456,ENSP00000363822,ENSP00000367309,ENSP00000399968,ENSP00000401303	AKT1,APC,AR,AXIN1,AXIN2,CCND1,CTNNB1,EGFR,ERBB2,ESR1,GRB2,HRAS,KRAS,MAOB,NCOA1,NCOA2,NCOR1,PIK3CA,SHC1
GO.0007548	sex differentiation	6	6.98e-05	ENSP00000206249,ENSP00000227507,ENSP00000320940,ENSP00000325120,ENSP00000344456,ENSP00000363822	AR,CCND1,CTNNB1,ESR1,NCOA1,PGR
GO.0010638	positive regulation of organelle organization	8	6.98e-05	ENSP00000257430,ENSP00000263967,ENSP00000265171,ENSP00000268712,ENSP00000270202,ENSP00000309845,ENSP00000339007,ENSP00000344456	AKT1,APC,CTNNB1,EGF,GRB2,HRAS,NCOR1,PIK3CA
GO.0048146	positive regulation of fibroblast proliferation	4	6.98e-05	ENSP00000206249,ENSP00000257904,ENSP00000265734,ENSP00000275493	CDK4,CDK6,EGFR,ESR1
GO.1901654	response to ketone	5	7.6e-05	ENSP00000227507,ENSP00000257904,ENSP00000270202,ENSP00000320940,ENSP00000367309	AKT1,CCND1,CDK4,MAOB,NCOA1
GO.0032268	regulation of cellular protein metabolic process	13	7.9e-05	ENSP00000227507,ENSP00000256078,ENSP00000262320,ENSP00000263967,ENSP00000266970,ENSP00000269571,ENSP00000270202,ENSP00000275493,ENSP00000302625,ENSP00000309845,ENSP00000339007,ENSP00000344456,ENSP00000401303	AKT1,AXIN1,AXIN2,CCND1,CDK2,CTNNB1,EGFR,ERBB2,GRB2,HRAS,KRAS,PIK3CA,SHC1
GO.0042221	response to chemical	16	9.38e-05	ENSP00000206249,ENSP00000231004,ENSP00000262320,ENSP00000265171,ENSP00000268712,ENSP00000270202,ENSP00000302625,ENSP00000309845,ENSP00000312326,ENSP00000325120,ENSP00000340684,ENSP00000344456,ENSP00000357643,ENSP00000363822,ENSP00000399968,ENSP00000401303	AKT1,AOC3,AR,AXIN1,AXIN2,CTNNB1,EGF,ESR1,HRAS,LOX,MAOA,MKI67,NCOA2,NCOR1,PGR,SHC1
GO.0045596	negative regulation of cell differentiation	8	9.82e-05	ENSP00000227507,ENSP00000256078,ENSP00000257430,ENSP00000262320,ENSP00000265734,ENSP00000269571,ENSP00000302625,ENSP00000344456	APC,AXIN1,AXIN2,CCND1,CDK6,CTNNB1,ERBB2,KRAS
GO.0007167	enzyme linked receptor protein signaling pathway	9	0.000105	ENSP00000256078,ENSP00000263967,ENSP00000265171,ENSP00000268712,ENSP00000269571,ENSP00000270202,ENSP00000275493,ENSP00000309845,ENSP00000401303	AKT1,EGF,EGFR,ERBB2,HRAS,KRAS,NCOR1,PIK3CA,SHC1
GO.0007264	small GTPase mediated signal transduction	8	0.000107	ENSP00000256078,ENSP00000266970,ENSP00000309845,ENSP00000339007,ENSP00000344456,ENSP00000363822,ENSP00000399968,ENSP00000401303	AR,CDK2,CTNNB1,GRB2,HRAS,KRAS,NCOA2,SHC1
GO.0045786	negative regulation of cell cycle	7	0.000107	ENSP00000227507,ENSP00000257430,ENSP00000257904,ENSP00000265734,ENSP00000266970,ENSP00000309845,ENSP00000344456	APC,CCND1,CDK2,CDK4,CDK6,CTNNB1,HRAS
GO.0061180	mammary gland epithelium development	4	0.000107	ENSP00000206249,ENSP00000227507,ENSP00000270202,ENSP00000325120	AKT1,CCND1,ESR1,PGR
GO.0048754	branching morphogenesis of an epithelial tube	5	0.000117	ENSP00000206249,ENSP00000256078,ENSP00000265171,ENSP00000325120,ENSP00000344456	CTNNB1,EGF,ESR1,KRAS,PGR
GO.0051000	positive regulation of nitric-oxide synthase activity	3	0.000125	ENSP00000206249,ENSP00000256078,ENSP00000270202	AKT1,ESR1,KRAS
GO.0019222	regulation of metabolic process	20	0.000126	ENSP00000206249,ENSP00000227507,ENSP00000256078,ENSP00000257430,ENSP00000257904,ENSP00000262320,ENSP00000265734,ENSP00000268712,ENSP00000269571,ENSP00000270202,ENSP00000275493,ENSP00000302625,ENSP00000309845,ENSP00000320940,ENSP00000339007,ENSP00000344456,ENSP00000363822,ENSP00000367309,ENSP00000399968,ENSP00000401303	AKT1,APC,AR,AXIN1,AXIN2,CCND1,CDK4,CDK6,CTNNB1,EGFR,ERBB2,ESR1,GRB2,HRAS,KRAS,MAOB,NCOA1,NCOA2,NCOR1,SHC1
GO.0000186	activation of MAPKK activity	4	0.000127	ENSP00000256078,ENSP00000265171,ENSP00000275493,ENSP00000309845	EGF,EGFR,HRAS,KRAS
GO.0071704	organic substance metabolic process	23	0.000129	ENSP00000206249,ENSP00000227507,ENSP00000231004,ENSP00000256078,ENSP00000257430,ENSP00000257904,ENSP00000263967,ENSP00000265734,ENSP00000266970,ENSP00000268712,ENSP00000269571,ENSP00000275493,ENSP00000302625,ENSP00000309845,ENSP00000312326,ENSP00000320940,ENSP00000325120,ENSP00000339007,ENSP00000344456,ENSP00000357643,ENSP00000363822,ENSP00000367309,ENSP00000401303	AOC3,APC,AR,AXIN2,CCND1,CDK2,CDK4,CDK6,CTNNB1,EGFR,ERBB2,ESR1,GRB2,HRAS,KRAS,LOX,MAOB,MKI67,NCOA1,NCOR1,PGR,PIK3CA,SHC1
GO.0008286	insulin receptor signaling pathway	5	0.00013	ENSP00000256078,ENSP00000263967,ENSP00000270202,ENSP00000309845,ENSP00000401303	AKT1,HRAS,KRAS,PIK3CA,SHC1
GO.0002376	immune system process	12	0.000134	ENSP00000256078,ENSP00000257430,ENSP00000263967,ENSP00000265171,ENSP00000265734,ENSP00000268712,ENSP00000269571,ENSP00000270202,ENSP00000275493,ENSP00000309845,ENSP00000339007,ENSP00000401303	AKT1,APC,CDK6,EGF,EGFR,ERBB2,GRB2,HRAS,KRAS,NCOR1,PIK3CA,SHC1
GO.0007169	transmembrane receptor protein tyrosine kinase signaling pathway	8	0.000136	ENSP00000256078,ENSP00000263967,ENSP00000265171,ENSP00000269571,ENSP00000270202,ENSP00000275493,ENSP00000309845,ENSP00000401303	AKT1,EGF,EGFR,ERBB2,HRAS,KRAS,PIK3CA,SHC1
GO.0006355	regulation of transcription, DNA-templated	15	0.000138	ENSP00000206249,ENSP00000227507,ENSP00000256078,ENSP00000262320,ENSP00000265171,ENSP00000266970,ENSP00000268712,ENSP00000269571,ENSP00000270202,ENSP00000275493,ENSP00000302625,ENSP00000309845,ENSP00000320940,ENSP00000344456,ENSP00000363822	AKT1,AR,AXIN1,AXIN2,CCND1,CDK2,CTNNB1,EGF,EGFR,ERBB2,ESR1,HRAS,KRAS,NCOA1,NCOR1
GO.0009950	dorsal/ventral axis specification	3	0.000143	ENSP00000262320,ENSP00000302625,ENSP00000344456	AXIN1,AXIN2,CTNNB1
GO.1901215	negative regulation of neuron death	5	0.000154	ENSP00000256078,ENSP00000263967,ENSP00000270202,ENSP00000309845,ENSP00000344456	AKT1,CTNNB1,HRAS,KRAS,PIK3CA
GO.0009636	response to toxic substance	5	0.000166	ENSP00000257904,ENSP00000266970,ENSP00000312326,ENSP00000367309,ENSP00000401303	AOC3,CDK2,CDK4,MAOB,SHC1
GO.0060749	mammary gland alveolus development	3	0.000166	ENSP00000206249,ENSP00000227507,ENSP00000265171	CCND1,EGF,ESR1
GO.0061377	mammary gland lobule development	3	0.000166	ENSP00000206249,ENSP00000227507,ENSP00000265171	CCND1,EGF,ESR1
GO.0080135	regulation of cellular response to stress	8	0.000166	ENSP00000262320,ENSP00000263967,ENSP00000265734,ENSP00000268712,ENSP00000270202,ENSP00000275493,ENSP00000302625,ENSP00000309845	AKT1,AXIN1,AXIN2,CDK6,EGFR,HRAS,NCOR1,PIK3CA
GO.0032147	activation of protein kinase activity	6	0.000171	ENSP00000256078,ENSP00000262320,ENSP00000263967,ENSP00000275493,ENSP00000309845,ENSP00000401303	AXIN1,EGFR,HRAS,KRAS,PIK3CA,SHC1
GO.0045944	positive regulation of transcription from RNA polymerase II promoter	9	0.00018	ENSP00000206249,ENSP00000270202,ENSP00000275493,ENSP00000309845,ENSP00000320940,ENSP00000325120,ENSP00000344456,ENSP00000363822,ENSP00000399968	AKT1,AR,CTNNB1,EGFR,ESR1,HRAS,NCOA1,NCOA2,PGR
GO.0045787	positive regulation of cell cycle	6	0.000185	ENSP00000227507,ENSP00000257904,ENSP00000265171,ENSP00000266970,ENSP00000270202,ENSP00000275493	AKT1,CCND1,CDK2,CDK4,EGF,EGFR
GO.0045737	positive regulation of cyclin-dependent protein serine/threonine kinase activity	3	0.000188	ENSP00000227507,ENSP00000270202,ENSP00000275493	AKT1,CCND1,EGFR
GO.1901700	response to oxygen-containing compound	10	0.000188	ENSP00000206249,ENSP00000227507,ENSP00000256078,ENSP00000257904,ENSP00000270202,ENSP00000309845,ENSP00000320940,ENSP00000344456,ENSP00000367309,ENSP00000401303	AKT1,CCND1,CDK4,CTNNB1,ESR1,HRAS,KRAS,MAOB,NCOA1,SHC1
GO.0042058	regulation of epidermal growth factor receptor signaling pathway	4	0.000207	ENSP00000265171,ENSP00000275493,ENSP00000339007,ENSP00000401303	EGF,EGFR,GRB2,SHC1
GO.0016477	cell migration	8	0.000215	ENSP00000256078,ENSP00000257430,ENSP00000263967,ENSP00000275493,ENSP00000309845,ENSP00000339007,ENSP00000344456,ENSP00000401303	APC,CTNNB1,EGFR,GRB2,HRAS,KRAS,PIK3CA,SHC1
GO.0022402	cell cycle process	9	0.000232	ENSP00000257904,ENSP00000265734,ENSP00000266970,ENSP00000268712,ENSP00000270202,ENSP00000275493,ENSP00000309845,ENSP00000344456,ENSP00000357643	AKT1,CDK2,CDK4,CDK6,CTNNB1,EGFR,HRAS,MKI67,NCOR1
GO.0044702	single organism reproductive process	9	0.000247	ENSP00000206249,ENSP00000227507,ENSP00000270202,ENSP00000275493,ENSP00000320940,ENSP00000325120,ENSP00000339007,ENSP00000344456,ENSP00000363822	AKT1,AR,CCND1,CTNNB1,EGFR,ESR1,GRB2,NCOA1,PGR
GO.2000379	positive regulation of reactive oxygen species metabolic process	4	0.000247	ENSP00000206249,ENSP00000270202,ENSP00000275493,ENSP00000339007	AKT1,EGFR,ESR1,GRB2
GO.0010564	regulation of cell cycle process	7	0.000248	ENSP00000227507,ENSP00000257904,ENSP00000265171,ENSP00000266970,ENSP00000270202,ENSP00000302625,ENSP00000344456	AKT1,AXIN2,CCND1,CDK2,CDK4,CTNNB1,EGF
GO.0045785	positive regulation of cell adhesion	6	0.000256	ENSP00000257430,ENSP00000263967,ENSP00000265734,ENSP00000269571,ENSP00000270202,ENSP00000339007	AKT1,APC,CDK6,ERBB2,GRB2,PIK3CA
GO.1901699	cellular response to nitrogen compound	7	0.000257	ENSP00000256078,ENSP00000263967,ENSP00000270202,ENSP00000275493,ENSP00000309845,ENSP00000344456,ENSP00000401303	AKT1,CTNNB1,EGFR,HRAS,KRAS,PIK3CA,SHC1
GO.1902531	regulation of intracellular signal transduction	10	0.000257	ENSP00000206249,ENSP00000257430,ENSP00000262320,ENSP00000269571,ENSP00000270202,ENSP00000275493,ENSP00000309845,ENSP00000339007,ENSP00000344456,ENSP00000401303	AKT1,APC,AXIN1,CTNNB1,EGFR,ERBB2,ESR1,GRB2,HRAS,SHC1
GO.0022008	neurogenesis	10	0.00028	ENSP00000256078,ENSP00000257430,ENSP00000262320,ENSP00000265734,ENSP00000275493,ENSP00000309845,ENSP00000320940,ENSP00000339007,ENSP00000344456,ENSP00000401303	APC,AXIN1,CDK6,CTNNB1,EGFR,GRB2,HRAS,KRAS,NCOA1,SHC1
GO.0006952	defense response	10	0.000285	ENSP00000256078,ENSP00000263967,ENSP00000265171,ENSP00000269571,ENSP00000275493,ENSP00000309845,ENSP00000312326,ENSP00000339007,ENSP00000344456,ENSP00000401303	AOC3,CTNNB1,EGF,EGFR,ERBB2,GRB2,HRAS,KRAS,PIK3CA,SHC1
GO.0030900	forebrain development	6	0.000293	ENSP00000262320,ENSP00000265734,ENSP00000268712,ENSP00000275493,ENSP00000320940,ENSP00000344456	AXIN1,CDK6,CTNNB1,EGFR,NCOA1,NCOR1
GO.0072358	cardiovascular system development	8	0.000293	ENSP00000231004,ENSP00000263967,ENSP00000265171,ENSP00000269571,ENSP00000270202,ENSP00000302625,ENSP00000344456,ENSP00000401303	AKT1,AXIN2,CTNNB1,EGF,ERBB2,LOX,PIK3CA,SHC1
GO.0072359	circulatory system development	8	0.000293	ENSP00000231004,ENSP00000263967,ENSP00000265171,ENSP00000269571,ENSP00000270202,ENSP00000302625,ENSP00000344456,ENSP00000401303	AKT1,AXIN2,CTNNB1,EGF,ERBB2,LOX,PIK3CA,SHC1
GO.0006464	cellular protein modification process	13	0.000334	ENSP00000227507,ENSP00000231004,ENSP00000256078,ENSP00000257904,ENSP00000263967,ENSP00000265734,ENSP00000266970,ENSP00000269571,ENSP00000275493,ENSP00000309845,ENSP00000320940,ENSP00000399968,ENSP00000401303	CCND1,CDK2,CDK4,CDK6,EGFR,ERBB2,HRAS,KRAS,LOX,NCOA1,NCOA2,PIK3CA,SHC1
GO.0044237	cellular metabolic process	22	0.000334	ENSP00000206249,ENSP00000227507,ENSP00000231004,ENSP00000256078,ENSP00000257430,ENSP00000257904,ENSP00000263967,ENSP00000265734,ENSP00000266970,ENSP00000268712,ENSP00000269571,ENSP00000275493,ENSP00000302625,ENSP00000309845,ENSP00000320940,ENSP00000325120,ENSP00000339007,ENSP00000344456,ENSP00000357643,ENSP00000363822,ENSP00000367309,ENSP00000401303	APC,AR,AXIN2,CCND1,CDK2,CDK4,CDK6,CTNNB1,EGFR,ERBB2,ESR1,GRB2,HRAS,KRAS,LOX,MAOB,MKI67,NCOA1,NCOR1,PGR,PIK3CA,SHC1
GO.0070602	regulation of centromeric sister chromatid cohesion	2	0.000346	ENSP00000302625,ENSP00000344456	AXIN2,CTNNB1
GO.0009628	response to abiotic stimulus	9	0.000358	ENSP00000227507,ENSP00000256078,ENSP00000257904,ENSP00000266970,ENSP00000270202,ENSP00000275493,ENSP00000339007,ENSP00000357643,ENSP00000401303	AKT1,CCND1,CDK2,CDK4,EGFR,GRB2,KRAS,MKI67,SHC1
GO.0051674	localization of cell	8	0.000359	ENSP00000256078,ENSP00000257430,ENSP00000263967,ENSP00000275493,ENSP00000309845,ENSP00000339007,ENSP00000344456,ENSP00000401303	APC,CTNNB1,EGFR,GRB2,HRAS,KRAS,PIK3CA,SHC1
GO.0000079	regulation of cyclin-dependent protein serine/threonine kinase activity	4	0.000362	ENSP00000227507,ENSP00000257430,ENSP00000270202,ENSP00000275493	AKT1,APC,CCND1,EGFR
GO.0035239	tube morphogenesis	6	0.000366	ENSP00000206249,ENSP00000256078,ENSP00000265171,ENSP00000275493,ENSP00000325120,ENSP00000344456	CTNNB1,EGF,EGFR,ESR1,KRAS,PGR
GO.0030155	regulation of cell adhesion	7	0.000372	ENSP00000257430,ENSP00000263967,ENSP00000265734,ENSP00000269571,ENSP00000270202,ENSP00000339007,ENSP00000344456	AKT1,APC,CDK6,CTNNB1,ERBB2,GRB2,PIK3CA
GO.0009798	axis specification	4	0.00039	ENSP00000257430,ENSP00000262320,ENSP00000302625,ENSP00000344456	APC,AXIN1,AXIN2,CTNNB1
GO.0045595	regulation of cell differentiation	10	0.00039	ENSP00000227507,ENSP00000256078,ENSP00000257430,ENSP00000262320,ENSP00000265734,ENSP00000269571,ENSP00000270202,ENSP00000302625,ENSP00000320940,ENSP00000344456	AKT1,APC,AXIN1,AXIN2,CCND1,CDK6,CTNNB1,ERBB2,KRAS,NCOA1
GO.0010941	regulation of cell death	10	0.000397	ENSP00000206249,ENSP00000256078,ENSP00000257904,ENSP00000270202,ENSP00000275493,ENSP00000302625,ENSP00000309845,ENSP00000320940,ENSP00000344456,ENSP00000363822	AKT1,AR,AXIN2,CDK4,CTNNB1,EGFR,ESR1,HRAS,KRAS,NCOA1
GO.0050896	response to stimulus	20	0.000397	ENSP00000206249,ENSP00000227507,ENSP00000231004,ENSP00000262320,ENSP00000265171,ENSP00000266970,ENSP00000268712,ENSP00000269571,ENSP00000270202,ENSP00000275493,ENSP00000302625,ENSP00000309845,ENSP00000312326,ENSP00000339007,ENSP00000340684,ENSP00000344456,ENSP00000357643,ENSP00000363822,ENSP00000399968,ENSP00000401303	AKT1,AOC3,AR,AXIN1,AXIN2,CCND1,CDK2,CTNNB1,EGF,EGFR,ERBB2,ESR1,GRB2,HRAS,LOX,MAOA,MKI67,NCOA2,NCOR1,SHC1
GO.0001701	in utero embryonic development	6	0.000398	ENSP00000262320,ENSP00000270202,ENSP00000275493,ENSP00000320940,ENSP00000339007,ENSP00000344456	AKT1,AXIN1,CTNNB1,EGFR,GRB2,NCOA1
GO.0001892	embryonic placenta development	4	0.000398	ENSP00000270202,ENSP00000275493,ENSP00000320940,ENSP00000339007	AKT1,EGFR,GRB2,NCOA1
GO.0035295	tube development	7	0.000398	ENSP00000206249,ENSP00000231004,ENSP00000256078,ENSP00000265171,ENSP00000275493,ENSP00000325120,ENSP00000344456	CTNNB1,EGF,EGFR,ESR1,KRAS,LOX,PGR
GO.0032879	regulation of localization	12	0.000428	ENSP00000257430,ENSP00000262320,ENSP00000265171,ENSP00000265734,ENSP00000268712,ENSP00000270202,ENSP00000275493,ENSP00000302625,ENSP00000309845,ENSP00000344456,ENSP00000363822,ENSP00000367309	AKT1,APC,AR,AXIN1,AXIN2,CDK6,CTNNB1,EGF,EGFR,HRAS,MAOB,NCOR1
GO.0051130	positive regulation of cellular component organization	9	0.000429	ENSP00000263967,ENSP00000265171,ENSP00000268712,ENSP00000270202,ENSP00000302625,ENSP00000309845,ENSP00000339007,ENSP00000344456,ENSP00000363822	AKT1,AR,AXIN2,CTNNB1,EGF,GRB2,HRAS,NCOR1,PIK3CA
GO.0009953	dorsal/ventral pattern formation	4	0.000446	ENSP00000257430,ENSP00000262320,ENSP00000302625,ENSP00000344456	APC,AXIN1,AXIN2,CTNNB1
GO.0007417	central nervous system development	8	0.000448	ENSP00000262320,ENSP00000265734,ENSP00000268712,ENSP00000269571,ENSP00000275493,ENSP00000320940,ENSP00000344456,ENSP00000367309	AXIN1,CDK6,CTNNB1,EGFR,ERBB2,MAOB,NCOA1,NCOR1
GO.0018193	peptidyl-amino acid modification	8	0.000471	ENSP00000265171,ENSP00000266970,ENSP00000269571,ENSP00000270202,ENSP00000275493,ENSP00000320940,ENSP00000399968,ENSP00000401303	AKT1,CDK2,EGF,EGFR,ERBB2,NCOA1,NCOA2,SHC1
GO.0051385	response to mineralocorticoid	3	0.000477	ENSP00000227507,ENSP00000256078,ENSP00000367309	CCND1,KRAS,MAOB
GO.1901698	response to nitrogen compound	8	0.000477	ENSP00000227507,ENSP00000256078,ENSP00000263967,ENSP00000270202,ENSP00000275493,ENSP00000309845,ENSP00000344456,ENSP00000401303	AKT1,CCND1,CTNNB1,EGFR,HRAS,KRAS,PIK3CA,SHC1
GO.0060541	respiratory system development	5	0.000488	ENSP00000231004,ENSP00000256078,ENSP00000262320,ENSP00000325120,ENSP00000344456	AXIN1,CTNNB1,KRAS,LOX,PGR
GO.0009887	organ morphogenesis	8	0.00051	ENSP00000206249,ENSP00000256078,ENSP00000262320,ENSP00000275493,ENSP00000302625,ENSP00000309845,ENSP00000325120,ENSP00000344456	AXIN1,AXIN2,CTNNB1,EGFR,ESR1,HRAS,KRAS,PGR
GO.0051276	chromosome organization	8	0.000517	ENSP00000206249,ENSP00000227507,ENSP00000257430,ENSP00000257904,ENSP00000266970,ENSP00000268712,ENSP00000302625,ENSP00000344456	APC,AXIN2,CCND1,CDK2,CDK4,CTNNB1,ESR1,NCOR1
GO.0060341	regulation of cellular localization	9	0.000533	ENSP00000257430,ENSP00000262320,ENSP00000265171,ENSP00000270202,ENSP00000275493,ENSP00000302625,ENSP00000344456,ENSP00000363822,ENSP00000367309	AKT1,APC,AR,AXIN1,AXIN2,CTNNB1,EGF,EGFR,MAOB
GO.0051239	regulation of multicellular organismal process	12	0.000551	ENSP00000206249,ENSP00000227507,ENSP00000257430,ENSP00000263967,ENSP00000265171,ENSP00000265734,ENSP00000268712,ENSP00000270202,ENSP00000302625,ENSP00000320940,ENSP00000344456,ENSP00000401303	AKT1,APC,AXIN2,CCND1,CDK6,CTNNB1,EGF,ESR1,NCOA1,NCOR1,PIK3CA,SHC1
GO.0045930	negative regulation of mitotic cell cycle	5	0.000566	ENSP00000227507,ENSP00000257430,ENSP00000266970,ENSP00000309845,ENSP00000344456	APC,CCND1,CDK2,CTNNB1,HRAS
GO.0048583	regulation of response to stimulus	14	0.000593	ENSP00000206249,ENSP00000227507,ENSP00000262320,ENSP00000263967,ENSP00000265734,ENSP00000269571,ENSP00000270202,ENSP00000275493,ENSP00000302625,ENSP00000309845,ENSP00000320940,ENSP00000363822,ENSP00000399968,ENSP00000401303	AKT1,AR,AXIN1,AXIN2,CCND1,CDK6,EGFR,ERBB2,ESR1,HRAS,NCOA1,NCOA2,PIK3CA,SHC1
GO.0007265	Ras protein signal transduction	5	0.000641	ENSP00000256078,ENSP00000266970,ENSP00000309845,ENSP00000339007,ENSP00000401303	CDK2,GRB2,HRAS,KRAS,SHC1
GO.1902589	single-organism organelle organization	11	0.000646	ENSP00000256078,ENSP00000257430,ENSP00000262320,ENSP00000266970,ENSP00000268712,ENSP00000302625,ENSP00000320940,ENSP00000344456,ENSP00000357643,ENSP00000399968,ENSP00000401303	APC,AXIN1,AXIN2,CDK2,CTNNB1,KRAS,MKI67,NCOA1,NCOA2,NCOR1,SHC1
GO.0045667	regulation of osteoblast differentiation	4	0.000648	ENSP00000257430,ENSP00000265734,ENSP00000302625,ENSP00000344456	APC,AXIN2,CDK6,CTNNB1
GO.0007399	nervous system development	11	0.0007	ENSP00000256078,ENSP00000257430,ENSP00000262320,ENSP00000265734,ENSP00000268712,ENSP00000309845,ENSP00000320940,ENSP00000339007,ENSP00000344456,ENSP00000367309,ENSP00000401303	APC,AXIN1,CDK6,CTNNB1,GRB2,HRAS,KRAS,MAOB,NCOA1,NCOR1,SHC1
GO.0030168	platelet activation	5	0.0007	ENSP00000263967,ENSP00000265171,ENSP00000270202,ENSP00000339007,ENSP00000401303	AKT1,EGF,GRB2,PIK3CA,SHC1
GO.0044267	cellular protein metabolic process	14	0.000707	ENSP00000227507,ENSP00000231004,ENSP00000256078,ENSP00000257430,ENSP00000257904,ENSP00000263967,ENSP00000265734,ENSP00000266970,ENSP00000269571,ENSP00000275493,ENSP00000309845,ENSP00000320940,ENSP00000399968,ENSP00000401303	APC,CCND1,CDK2,CDK4,CDK6,EGFR,ERBB2,HRAS,KRAS,LOX,NCOA1,NCOA2,PIK3CA,SHC1
GO.0050900	leukocyte migration	5	0.000707	ENSP00000256078,ENSP00000263967,ENSP00000309845,ENSP00000339007,ENSP00000401303	GRB2,HRAS,KRAS,PIK3CA,SHC1
GO.0042493	response to drug	6	0.000711	ENSP00000227507,ENSP00000231004,ENSP00000257904,ENSP00000266970,ENSP00000344456,ENSP00000367309	CCND1,CDK2,CDK4,CTNNB1,LOX,MAOB
GO.0043410	positive regulation of MAPK cascade	6	0.000711	ENSP00000262320,ENSP00000269571,ENSP00000275493,ENSP00000309845,ENSP00000344456,ENSP00000401303	AXIN1,CTNNB1,EGFR,ERBB2,HRAS,SHC1
GO.0065007	biological regulation	23	0.000715	ENSP00000206249,ENSP00000227507,ENSP00000256078,ENSP00000257430,ENSP00000257904,ENSP00000262320,ENSP00000265171,ENSP00000265734,ENSP00000266970,ENSP00000268712,ENSP00000269571,ENSP00000270202,ENSP00000275493,ENSP00000302625,ENSP00000309845,ENSP00000320940,ENSP00000339007,ENSP00000340684,ENSP00000344456,ENSP00000363822,ENSP00000367309,ENSP00000399968,ENSP00000401303	AKT1,APC,AR,AXIN1,AXIN2,CCND1,CDK2,CDK4,CDK6,CTNNB1,EGF,EGFR,ERBB2,ESR1,GRB2,HRAS,KRAS,MAOA,MAOB,NCOA1,NCOA2,NCOR1,SHC1
GO.0007420	brain development	7	0.000729	ENSP00000262320,ENSP00000265734,ENSP00000268712,ENSP00000275493,ENSP00000320940,ENSP00000344456,ENSP00000367309	AXIN1,CDK6,CTNNB1,EGFR,MAOB,NCOA1,NCOR1
GO.0048010	vascular endothelial growth factor receptor signaling pathway	4	0.000748	ENSP00000256078,ENSP00000263967,ENSP00000270202,ENSP00000309845	AKT1,HRAS,KRAS,PIK3CA
GO.0045429	positive regulation of nitric oxide biosynthetic process	3	0.000762	ENSP00000206249,ENSP00000270202,ENSP00000275493	AKT1,EGFR,ESR1
GO.0050863	regulation of T cell activation	5	0.00079	ENSP00000263967,ENSP00000269571,ENSP00000270202,ENSP00000339007,ENSP00000344456	AKT1,CTNNB1,ERBB2,GRB2,PIK3CA
GO.0016337	single organismal cell-cell adhesion	6	0.000817	ENSP00000257430,ENSP00000265734,ENSP00000268712,ENSP00000275493,ENSP00000344456,ENSP00000401303	APC,CDK6,CTNNB1,EGFR,NCOR1,SHC1
GO.0007166	cell surface receptor signaling pathway	11	0.000914	ENSP00000262320,ENSP00000263967,ENSP00000265171,ENSP00000265734,ENSP00000268712,ENSP00000269571,ENSP00000275493,ENSP00000302625,ENSP00000309845,ENSP00000344456,ENSP00000401303	AXIN1,AXIN2,CDK6,CTNNB1,EGF,EGFR,ERBB2,HRAS,NCOR1,PIK3CA,SHC1
GO.0042420	dopamine catabolic process	2	0.000914	ENSP00000340684,ENSP00000367309	MAOA,MAOB
GO.0044336	canonical Wnt signaling pathway involved in negative regulation of apoptotic process	2	0.000914	ENSP00000257430,ENSP00000344456	APC,CTNNB1
GO.0048568	embryonic organ development	6	0.000914	ENSP00000262320,ENSP00000270202,ENSP00000275493,ENSP00000320940,ENSP00000339007,ENSP00000344456	AKT1,AXIN1,CTNNB1,EGFR,GRB2,NCOA1
GO.0060745	mammary gland branching involved in pregnancy	2	0.000914	ENSP00000206249,ENSP00000325120	ESR1,PGR
GO.0006367	transcription initiation from RNA polymerase II promoter	5	0.000919	ENSP00000206249,ENSP00000268712,ENSP00000270202,ENSP00000325120,ENSP00000363822	AKT1,AR,ESR1,NCOR1,PGR
GO.0006357	regulation of transcription from RNA polymerase II promoter	10	0.000966	ENSP00000206249,ENSP00000227507,ENSP00000262320,ENSP00000268712,ENSP00000270202,ENSP00000275493,ENSP00000309845,ENSP00000320940,ENSP00000344456,ENSP00000363822	AKT1,AR,AXIN1,CCND1,CTNNB1,EGFR,ESR1,HRAS,NCOA1,NCOR1
GO.0030182	neuron differentiation	8	0.000974	ENSP00000256078,ENSP00000257430,ENSP00000262320,ENSP00000275493,ENSP00000309845,ENSP00000339007,ENSP00000344456,ENSP00000401303	APC,AXIN1,CTNNB1,EGFR,GRB2,HRAS,KRAS,SHC1
GO.1903320	regulation of protein modification by small protein conjugation or removal	5	0.001	ENSP00000257430,ENSP00000262320,ENSP00000265171,ENSP00000266970,ENSP00000344456	APC,AXIN1,CDK2,CTNNB1,EGF
GO.0001568	blood vessel development	6	0.00101	ENSP00000231004,ENSP00000263967,ENSP00000265171,ENSP00000270202,ENSP00000344456,ENSP00000401303	AKT1,CTNNB1,EGF,LOX,PIK3CA,SHC1
GO.0030217	T cell differentiation	4	0.00101	ENSP00000257430,ENSP00000265734,ENSP00000268712,ENSP00000344456	APC,CDK6,CTNNB1,NCOR1
GO.0030521	androgen receptor signaling pathway	3	0.00101	ENSP00000320940,ENSP00000344456,ENSP00000363822	AR,CTNNB1,NCOA1
GO.0060322	head development	7	0.00104	ENSP00000262320,ENSP00000265734,ENSP00000268712,ENSP00000275493,ENSP00000320940,ENSP00000344456,ENSP00000367309	AXIN1,CDK6,CTNNB1,EGFR,MAOB,NCOA1,NCOR1
GO.0007346	regulation of mitotic cell cycle	6	0.00109	ENSP00000227507,ENSP00000257904,ENSP00000265171,ENSP00000266970,ENSP00000309845,ENSP00000344456	CCND1,CDK2,CDK4,CTNNB1,EGF,HRAS
GO.0043933	macromolecular complex subunit organization	11	0.00109	ENSP00000206249,ENSP00000227507,ENSP00000231004,ENSP00000257904,ENSP00000262320,ENSP00000265171,ENSP00000266970,ENSP00000268712,ENSP00000309845,ENSP00000344456,ENSP00000363822	AR,AXIN1,CCND1,CDK2,CDK4,CTNNB1,EGF,ESR1,HRAS,LOX,NCOR1
GO.0007049	cell cycle	9	0.0011	ENSP00000257904,ENSP00000265734,ENSP00000266970,ENSP00000268712,ENSP00000270202,ENSP00000275493,ENSP00000309845,ENSP00000344456,ENSP00000357643	AKT1,CDK2,CDK4,CDK6,CTNNB1,EGFR,HRAS,MKI67,NCOR1
GO.0006725	cellular aromatic compound metabolic process	16	0.00112	ENSP00000206249,ENSP00000227507,ENSP00000262320,ENSP00000265171,ENSP00000266970,ENSP00000268712,ENSP00000269571,ENSP00000270202,ENSP00000302625,ENSP00000320940,ENSP00000325120,ENSP00000344456,ENSP00000357643,ENSP00000363822,ENSP00000367309,ENSP00000399968	AKT1,AR,AXIN1,AXIN2,CCND1,CDK2,CTNNB1,EGF,ERBB2,ESR1,MAOB,MKI67,NCOA1,NCOA2,NCOR1,PGR
GO.0030850	prostate gland development	3	0.00112	ENSP00000206249,ENSP00000344456,ENSP00000363822	AR,CTNNB1,ESR1
GO.0046483	heterocycle metabolic process	16	0.00112	ENSP00000206249,ENSP00000227507,ENSP00000262320,ENSP00000265171,ENSP00000266970,ENSP00000268712,ENSP00000269571,ENSP00000270202,ENSP00000302625,ENSP00000320940,ENSP00000325120,ENSP00000340684,ENSP00000344456,ENSP00000357643,ENSP00000363822,ENSP00000399968	AKT1,AR,AXIN1,AXIN2,CCND1,CDK2,CTNNB1,EGF,ERBB2,ESR1,MAOA,MKI67,NCOA1,NCOA2,NCOR1,PGR
GO.0042059	negative regulation of epidermal growth factor receptor signaling pathway	3	0.0012	ENSP00000265171,ENSP00000275493,ENSP00000339007	EGF,EGFR,GRB2
GO.0010001	glial cell differentiation	4	0.00121	ENSP00000265734,ENSP00000269571,ENSP00000270202,ENSP00000344456	AKT1,CDK6,CTNNB1,ERBB2
GO.0090263	positive regulation of canonical Wnt signaling pathway	4	0.00121	ENSP00000257430,ENSP00000262320,ENSP00000302625,ENSP00000344456	APC,AXIN1,AXIN2,CTNNB1
GO.0001944	vasculature development	6	0.00126	ENSP00000231004,ENSP00000263967,ENSP00000265171,ENSP00000270202,ENSP00000344456,ENSP00000401303	AKT1,CTNNB1,EGF,LOX,PIK3CA,SHC1
GO.0042981	regulation of apoptotic process	9	0.00137	ENSP00000206249,ENSP00000256078,ENSP00000257904,ENSP00000270202,ENSP00000275493,ENSP00000309845,ENSP00000320940,ENSP00000344456,ENSP00000363822	AKT1,AR,CDK4,CTNNB1,EGFR,ESR1,HRAS,KRAS,NCOA1
GO.1903047	mitotic cell cycle process	7	0.0014	ENSP00000227507,ENSP00000257904,ENSP00000265734,ENSP00000266970,ENSP00000270202,ENSP00000275493,ENSP00000309845	AKT1,CCND1,CDK2,CDK4,CDK6,EGFR,HRAS
GO.0071383	cellular response to steroid hormone stimulus	4	0.0015	ENSP00000206249,ENSP00000275493,ENSP00000325120,ENSP00000363822	AR,EGFR,ESR1,PGR
GO.0051704	multi-organism process	11	0.00159	ENSP00000206249,ENSP00000256078,ENSP00000265734,ENSP00000270202,ENSP00000309845,ENSP00000320940,ENSP00000325120,ENSP00000339007,ENSP00000344456,ENSP00000367309,ENSP00000401303	AKT1,CDK6,CTNNB1,ESR1,GRB2,HRAS,KRAS,MAOB,NCOA1,PGR,SHC1
GO.0080134	regulation of response to stress	9	0.00164	ENSP00000256078,ENSP00000262320,ENSP00000263967,ENSP00000265734,ENSP00000268712,ENSP00000270202,ENSP00000275493,ENSP00000302625,ENSP00000309845	AKT1,AXIN1,AXIN2,CDK6,EGFR,HRAS,KRAS,NCOR1,PIK3CA
GO.0046661	male sex differentiation	4	0.00165	ENSP00000206249,ENSP00000227507,ENSP00000320940,ENSP00000344456	CCND1,CTNNB1,ESR1,NCOA1
GO.0030111	regulation of Wnt signaling pathway	5	0.00167	ENSP00000227507,ENSP00000257430,ENSP00000262320,ENSP00000302625,ENSP00000344456	APC,AXIN1,AXIN2,CCND1,CTNNB1
GO.0033077	T cell differentiation in thymus	3	0.00167	ENSP00000257430,ENSP00000265734,ENSP00000344456	APC,CDK6,CTNNB1
GO.0060711	labyrinthine layer development	3	0.00167	ENSP00000270202,ENSP00000320940,ENSP00000339007	AKT1,GRB2,NCOA1
GO.0090244	Wnt signaling pathway involved in somitogenesis	2	0.00167	ENSP00000262320,ENSP00000302625	AXIN1,AXIN2
GO.0051384	response to glucocorticoid	4	0.0017	ENSP00000227507,ENSP00000256078,ENSP00000367309,ENSP00000401303	CCND1,KRAS,MAOB,SHC1
GO.0051179	localization	15	0.00173	ENSP00000227507,ENSP00000256078,ENSP00000257430,ENSP00000262320,ENSP00000263967,ENSP00000265171,ENSP00000266970,ENSP00000302625,ENSP00000312326,ENSP00000339007,ENSP00000340684,ENSP00000344456,ENSP00000363822,ENSP00000399968,ENSP00000401303	AOC3,APC,AR,AXIN1,AXIN2,CCND1,CDK2,CTNNB1,EGF,GRB2,KRAS,MAOA,NCOA2,PIK3CA,SHC1
GO.0050789	regulation of biological process	22	0.00177	ENSP00000206249,ENSP00000227507,ENSP00000256078,ENSP00000257430,ENSP00000257904,ENSP00000262320,ENSP00000265171,ENSP00000265734,ENSP00000266970,ENSP00000268712,ENSP00000269571,ENSP00000270202,ENSP00000275493,ENSP00000302625,ENSP00000309845,ENSP00000320940,ENSP00000339007,ENSP00000344456,ENSP00000363822,ENSP00000367309,ENSP00000399968,ENSP00000401303	AKT1,APC,AR,AXIN1,AXIN2,CCND1,CDK2,CDK4,CDK6,CTNNB1,EGF,EGFR,ERBB2,ESR1,GRB2,HRAS,KRAS,MAOB,NCOA1,NCOA2,NCOR1,SHC1
GO.0001890	placenta development	4	0.00178	ENSP00000270202,ENSP00000275493,ENSP00000320940,ENSP00000339007	AKT1,EGFR,GRB2,NCOA1
GO.0021543	pallium development	4	0.00178	ENSP00000265734,ENSP00000275493,ENSP00000320940,ENSP00000344456	CDK6,CTNNB1,EGFR,NCOA1
GO.0031323	regulation of cellular metabolic process	17	0.00183	ENSP00000206249,ENSP00000227507,ENSP00000256078,ENSP00000262320,ENSP00000268712,ENSP00000269571,ENSP00000270202,ENSP00000275493,ENSP00000302625,ENSP00000309845,ENSP00000320940,ENSP00000339007,ENSP00000344456,ENSP00000363822,ENSP00000367309,ENSP00000399968,ENSP00000401303	AKT1,AR,AXIN1,AXIN2,CCND1,CTNNB1,EGFR,ERBB2,ESR1,GRB2,HRAS,KRAS,MAOB,NCOA1,NCOA2,NCOR1,SHC1
GO.0044700	single organism signaling	16	0.00188	ENSP00000206249,ENSP00000257904,ENSP00000262320,ENSP00000265171,ENSP00000265734,ENSP00000266970,ENSP00000268712,ENSP00000269571,ENSP00000275493,ENSP00000302625,ENSP00000309845,ENSP00000339007,ENSP00000340684,ENSP00000344456,ENSP00000363822,ENSP00000401303	AR,AXIN1,AXIN2,CDK2,CDK4,CDK6,CTNNB1,EGF,EGFR,ERBB2,ESR1,GRB2,HRAS,MAOA,NCOR1,SHC1
GO.1901360	organic cyclic compound metabolic process	16	0.00188	ENSP00000206249,ENSP00000227507,ENSP00000262320,ENSP00000265171,ENSP00000266970,ENSP00000268712,ENSP00000269571,ENSP00000270202,ENSP00000302625,ENSP00000320940,ENSP00000325120,ENSP00000344456,ENSP00000357643,ENSP00000363822,ENSP00000367309,ENSP00000399968	AKT1,AR,AXIN1,AXIN2,CCND1,CDK2,CTNNB1,EGF,ERBB2,ESR1,MAOB,MKI67,NCOA1,NCOA2,NCOR1,PGR
GO.0033043	regulation of organelle organization	8	0.00189	ENSP00000263967,ENSP00000265171,ENSP00000268712,ENSP00000270202,ENSP00000302625,ENSP00000309845,ENSP00000339007,ENSP00000344456	AKT1,AXIN2,CTNNB1,EGF,GRB2,HRAS,NCOR1,PIK3CA
GO.0016568	chromatin modification	6	0.0021	ENSP00000206249,ENSP00000266970,ENSP00000268712,ENSP00000320940,ENSP00000344456,ENSP00000399968	CDK2,CTNNB1,ESR1,NCOA1,NCOA2,NCOR1
GO.0046328	regulation of JNK cascade	4	0.0021	ENSP00000262320,ENSP00000268712,ENSP00000270202,ENSP00000309845	AKT1,AXIN1,HRAS,NCOR1
GO.0031659	positive regulation of cyclin-dependent protein serine/threonine kinase activity involved in G1/S transition of mitotic cell cycle	2	0.00211	ENSP00000270202,ENSP00000275493	AKT1,EGFR
GO.0018108	peptidyl-tyrosine phosphorylation	4	0.00213	ENSP00000265171,ENSP00000269571,ENSP00000275493,ENSP00000401303	EGF,EGFR,ERBB2,SHC1
GO.0009605	response to external stimulus	10	0.00214	ENSP00000227507,ENSP00000256078,ENSP00000263967,ENSP00000265734,ENSP00000270202,ENSP00000275493,ENSP00000309845,ENSP00000320940,ENSP00000339007,ENSP00000367309	AKT1,CCND1,CDK6,EGFR,GRB2,HRAS,KRAS,MAOB,NCOA1,PIK3CA
GO.0060562	epithelial tube morphogenesis	5	0.00214	ENSP00000206249,ENSP00000256078,ENSP00000265171,ENSP00000325120,ENSP00000344456	CTNNB1,EGF,ESR1,KRAS,PGR
GO.0006109	regulation of carbohydrate metabolic process	4	0.00216	ENSP00000265171,ENSP00000268712,ENSP00000270202,ENSP00000399968	AKT1,EGF,NCOA2,NCOR1
GO.0060135	maternal process involved in female pregnancy	3	0.00224	ENSP00000206249,ENSP00000270202,ENSP00000325120	AKT1,ESR1,PGR
GO.0007010	cytoskeleton organization	7	0.00225	ENSP00000256078,ENSP00000257430,ENSP00000262320,ENSP00000266970,ENSP00000268712,ENSP00000344456,ENSP00000401303	APC,AXIN1,CDK2,CTNNB1,KRAS,NCOR1,SHC1
GO.0009894	regulation of catabolic process	7	0.00225	ENSP00000257430,ENSP00000262320,ENSP00000263967,ENSP00000265171,ENSP00000268712,ENSP00000270202,ENSP00000275493	AKT1,APC,AXIN1,EGF,EGFR,NCOR1,PIK3CA
GO.0007154	cell communication	16	0.0024	ENSP00000206249,ENSP00000257904,ENSP00000262320,ENSP00000265171,ENSP00000265734,ENSP00000266970,ENSP00000268712,ENSP00000269571,ENSP00000275493,ENSP00000302625,ENSP00000309845,ENSP00000339007,ENSP00000340684,ENSP00000344456,ENSP00000363822,ENSP00000401303	AR,AXIN1,AXIN2,CDK2,CDK4,CDK6,CTNNB1,EGF,EGFR,ERBB2,ESR1,GRB2,HRAS,MAOA,NCOR1,SHC1
GO.0000226	microtubule cytoskeleton organization	5	0.00246	ENSP00000257430,ENSP00000262320,ENSP00000266970,ENSP00000268712,ENSP00000344456	APC,AXIN1,CDK2,CTNNB1,NCOR1
GO.0000278	mitotic cell cycle	7	0.00248	ENSP00000227507,ENSP00000257904,ENSP00000265734,ENSP00000266970,ENSP00000270202,ENSP00000275493,ENSP00000309845	AKT1,CCND1,CDK2,CDK4,CDK6,EGFR,HRAS
GO.0001654	eye development	5	0.00252	ENSP00000257430,ENSP00000257904,ENSP00000262320,ENSP00000266970,ENSP00000344456	APC,AXIN1,CDK2,CDK4,CTNNB1
GO.0010646	regulation of cell communication	12	0.00263	ENSP00000206249,ENSP00000227507,ENSP00000262320,ENSP00000263967,ENSP00000269571,ENSP00000270202,ENSP00000275493,ENSP00000302625,ENSP00000309845,ENSP00000363822,ENSP00000399968,ENSP00000401303	AKT1,AR,AXIN1,AXIN2,CCND1,EGFR,ERBB2,ESR1,HRAS,NCOA2,PIK3CA,SHC1
GO.0007093	mitotic cell cycle checkpoint	4	0.00264	ENSP00000227507,ENSP00000257430,ENSP00000266970,ENSP00000309845	APC,CCND1,CDK2,HRAS
GO.0043066	negative regulation of apoptotic process	7	0.00264	ENSP00000256078,ENSP00000257430,ENSP00000270202,ENSP00000275493,ENSP00000309845,ENSP00000344456,ENSP00000363822	AKT1,APC,AR,CTNNB1,EGFR,HRAS,KRAS
GO.0043401	steroid hormone mediated signaling pathway	3	0.00265	ENSP00000206249,ENSP00000325120,ENSP00000363822	AR,ESR1,PGR
GO.0006996	organelle organization	12	0.0027	ENSP00000206249,ENSP00000227507,ENSP00000256078,ENSP00000257430,ENSP00000257904,ENSP00000262320,ENSP00000266970,ENSP00000268712,ENSP00000270202,ENSP00000302625,ENSP00000357643,ENSP00000401303	AKT1,APC,AXIN1,AXIN2,CCND1,CDK2,CDK4,ESR1,KRAS,MKI67,NCOR1,SHC1
GO.0042063	gliogenesis	4	0.00273	ENSP00000265734,ENSP00000269571,ENSP00000270202,ENSP00000344456	AKT1,CDK6,CTNNB1,ERBB2
GO.0006139	nucleobase-containing compound metabolic process	15	0.00275	ENSP00000206249,ENSP00000227507,ENSP00000262320,ENSP00000265171,ENSP00000266970,ENSP00000268712,ENSP00000269571,ENSP00000270202,ENSP00000302625,ENSP00000320940,ENSP00000325120,ENSP00000344456,ENSP00000357643,ENSP00000363822,ENSP00000399968	AKT1,AR,AXIN1,AXIN2,CCND1,CDK2,CTNNB1,EGF,ERBB2,ESR1,MKI67,NCOA1,NCOA2,NCOR1,PGR
GO.0031295	T cell costimulation	3	0.00275	ENSP00000263967,ENSP00000270202,ENSP00000339007	AKT1,GRB2,PIK3CA
GO.0009966	regulation of signal transduction	11	0.00278	ENSP00000206249,ENSP00000227507,ENSP00000262320,ENSP00000269571,ENSP00000270202,ENSP00000275493,ENSP00000302625,ENSP00000309845,ENSP00000363822,ENSP00000399968,ENSP00000401303	AKT1,AR,AXIN1,AXIN2,CCND1,EGFR,ERBB2,ESR1,HRAS,NCOA2,SHC1
GO.0035413	positive regulation of catenin import into nucleus	2	0.00306	ENSP00000265171,ENSP00000275493	EGF,EGFR
GO.0060768	regulation of epithelial cell proliferation involved in prostate gland development	2	0.00306	ENSP00000257430,ENSP00000344456	APC,CTNNB1
GO.0002088	lens development in camera-type eye	3	0.00326	ENSP00000257904,ENSP00000266970,ENSP00000344456	CDK2,CDK4,CTNNB1
GO.0030324	lung development	4	0.00348	ENSP00000231004,ENSP00000256078,ENSP00000325120,ENSP00000344456	CTNNB1,KRAS,LOX,PGR
GO.0071396	cellular response to lipid	5	0.00354	ENSP00000206249,ENSP00000270202,ENSP00000275493,ENSP00000325120,ENSP00000363822	AKT1,AR,EGFR,ESR1,PGR
GO.0007165	signal transduction	15	0.00356	ENSP00000206249,ENSP00000257904,ENSP00000262320,ENSP00000265171,ENSP00000265734,ENSP00000266970,ENSP00000268712,ENSP00000269571,ENSP00000275493,ENSP00000302625,ENSP00000309845,ENSP00000339007,ENSP00000344456,ENSP00000363822,ENSP00000401303	AR,AXIN1,AXIN2,CDK2,CDK4,CDK6,CTNNB1,EGF,EGFR,ERBB2,ESR1,GRB2,HRAS,NCOR1,SHC1
GO.0030178	negative regulation of Wnt signaling pathway	4	0.00356	ENSP00000227507,ENSP00000257430,ENSP00000262320,ENSP00000302625	APC,AXIN1,AXIN2,CCND1
GO.0090304	nucleic acid metabolic process	14	0.00356	ENSP00000206249,ENSP00000227507,ENSP00000265171,ENSP00000266970,ENSP00000268712,ENSP00000269571,ENSP00000270202,ENSP00000302625,ENSP00000320940,ENSP00000325120,ENSP00000344456,ENSP00000357643,ENSP00000363822,ENSP00000399968	AKT1,AR,AXIN2,CCND1,CDK2,CTNNB1,EGF,ERBB2,ESR1,MKI67,NCOA1,NCOA2,NCOR1,PGR
GO.0045945	positive regulation of transcription from RNA polymerase III promoter	2	0.00364	ENSP00000269571,ENSP00000363822	AR,ERBB2
GO.0030323	respiratory tube development	4	0.0037	ENSP00000231004,ENSP00000256078,ENSP00000325120,ENSP00000344456	CTNNB1,KRAS,LOX,PGR
GO.0033554	cellular response to stress	9	0.00393	ENSP00000257430,ENSP00000262320,ENSP00000263967,ENSP00000266970,ENSP00000270202,ENSP00000309845,ENSP00000339007,ENSP00000357643,ENSP00000401303	AKT1,APC,AXIN1,CDK2,GRB2,HRAS,MKI67,PIK3CA,SHC1
GO.0050794	regulation of cellular process	21	0.00395	ENSP00000206249,ENSP00000227507,ENSP00000256078,ENSP00000257904,ENSP00000262320,ENSP00000265171,ENSP00000265734,ENSP00000266970,ENSP00000268712,ENSP00000269571,ENSP00000270202,ENSP00000275493,ENSP00000302625,ENSP00000309845,ENSP00000320940,ENSP00000339007,ENSP00000344456,ENSP00000363822,ENSP00000367309,ENSP00000399968,ENSP00000401303	AKT1,AR,AXIN1,AXIN2,CCND1,CDK2,CDK4,CDK6,CTNNB1,EGF,EGFR,ERBB2,ESR1,GRB2,HRAS,KRAS,MAOB,NCOA1,NCOA2,NCOR1,SHC1
GO.0051234	establishment of localization	13	0.00396	ENSP00000227507,ENSP00000262320,ENSP00000263967,ENSP00000265171,ENSP00000266970,ENSP00000275493,ENSP00000309845,ENSP00000312326,ENSP00000339007,ENSP00000340684,ENSP00000344456,ENSP00000363822,ENSP00000399968	AOC3,AR,AXIN1,CCND1,CDK2,CTNNB1,EGF,EGFR,GRB2,HRAS,MAOA,NCOA2,PIK3CA
GO.0002064	epithelial cell development	4	0.00422	ENSP00000206249,ENSP00000265734,ENSP00000325120,ENSP00000344456	CDK6,CTNNB1,ESR1,PGR
GO.0043009	chordate embryonic development	6	0.00422	ENSP00000270202,ENSP00000275493,ENSP00000302625,ENSP00000320940,ENSP00000339007,ENSP00000344456	AKT1,AXIN2,CTNNB1,EGFR,GRB2,NCOA1
GO.0000003	reproduction	7	0.0045	ENSP00000206249,ENSP00000266970,ENSP00000270202,ENSP00000320940,ENSP00000325120,ENSP00000344456,ENSP00000357643	AKT1,CDK2,CTNNB1,ESR1,MKI67,NCOA1,PGR
GO.0008406	gonad development	4	0.00453	ENSP00000206249,ENSP00000227507,ENSP00000320940,ENSP00000325120	CCND1,ESR1,NCOA1,PGR
GO.0006325	chromatin organization	6	0.00466	ENSP00000206249,ENSP00000227507,ENSP00000257904,ENSP00000266970,ENSP00000268712,ENSP00000344456	CCND1,CDK2,CDK4,CTNNB1,ESR1,NCOR1
GO.0009952	anterior/posterior pattern specification	4	0.00492	ENSP00000257430,ENSP00000262320,ENSP00000302625,ENSP00000344456	APC,AXIN1,AXIN2,CTNNB1
GO.0045137	development of primary sexual characteristics	4	0.00492	ENSP00000206249,ENSP00000227507,ENSP00000320940,ENSP00000325120	CCND1,ESR1,NCOA1,PGR
GO.0060272	embryonic skeletal joint morphogenesis	2	0.00492	ENSP00000262320,ENSP00000344456	AXIN1,CTNNB1
GO.0044707	single-multicellular organism process	16	0.00522	ENSP00000206249,ENSP00000227507,ENSP00000231004,ENSP00000257430,ENSP00000257904,ENSP00000265734,ENSP00000268712,ENSP00000302625,ENSP00000309845,ENSP00000320940,ENSP00000325120,ENSP00000344456,ENSP00000357643,ENSP00000363822,ENSP00000367309,ENSP00000399968	APC,AR,AXIN2,CCND1,CDK4,CDK6,CTNNB1,ESR1,HRAS,LOX,MAOB,MKI67,NCOA1,NCOA2,NCOR1,PGR
GO.0030154	cell differentiation	12	0.00527	ENSP00000206249,ENSP00000227507,ENSP00000257430,ENSP00000262320,ENSP00000265734,ENSP00000268712,ENSP00000275493,ENSP00000309845,ENSP00000320940,ENSP00000325120,ENSP00000344456,ENSP00000401303	APC,AXIN1,CCND1,CDK6,CTNNB1,EGFR,ESR1,HRAS,NCOA1,NCOR1,PGR,SHC1
GO.0097194	execution phase of apoptosis	3	0.00527	ENSP00000257430,ENSP00000270202,ENSP00000344456	AKT1,APC,CTNNB1
GO.0031175	neuron projection development	6	0.00547	ENSP00000256078,ENSP00000257430,ENSP00000275493,ENSP00000309845,ENSP00000339007,ENSP00000401303	APC,EGFR,GRB2,HRAS,KRAS,SHC1
GO.0051128	regulation of cellular component organization	10	0.00554	ENSP00000263967,ENSP00000265171,ENSP00000268712,ENSP00000269571,ENSP00000270202,ENSP00000302625,ENSP00000309845,ENSP00000339007,ENSP00000344456,ENSP00000363822	AKT1,AR,AXIN2,CTNNB1,EGF,ERBB2,GRB2,HRAS,NCOR1,PIK3CA
GO.0001942	hair follicle development	3	0.00558	ENSP00000257430,ENSP00000275493,ENSP00000344456	APC,CTNNB1,EGFR
GO.0060788	ectodermal placode formation	2	0.00558	ENSP00000262320,ENSP00000344456	AXIN1,CTNNB1
GO.0071696	ectodermal placode development	2	0.00558	ENSP00000262320,ENSP00000344456	AXIN1,CTNNB1
GO.0071697	ectodermal placode morphogenesis	2	0.00558	ENSP00000262320,ENSP00000344456	AXIN1,CTNNB1
GO.0031016	pancreas development	3	0.00575	ENSP00000265734,ENSP00000270202,ENSP00000344456	AKT1,CDK6,CTNNB1
GO.0043467	regulation of generation of precursor metabolites and energy	3	0.00575	ENSP00000263967,ENSP00000268712,ENSP00000270202	AKT1,NCOR1,PIK3CA
GO.0098773	skin epidermis development	3	0.00575	ENSP00000257430,ENSP00000275493,ENSP00000344456	APC,CTNNB1,EGFR
GO.0030030	cell projection organization	7	0.00594	ENSP00000256078,ENSP00000257430,ENSP00000270202,ENSP00000275493,ENSP00000309845,ENSP00000339007,ENSP00000401303	AKT1,APC,EGFR,GRB2,HRAS,KRAS,SHC1
GO.0051705	multi-organism behavior	3	0.00594	ENSP00000256078,ENSP00000309845,ENSP00000320940	HRAS,KRAS,NCOA1
GO.0044238	primary metabolic process	20	0.00623	ENSP00000206249,ENSP00000227507,ENSP00000231004,ENSP00000256078,ENSP00000257430,ENSP00000257904,ENSP00000263967,ENSP00000265734,ENSP00000266970,ENSP00000268712,ENSP00000269571,ENSP00000275493,ENSP00000302625,ENSP00000309845,ENSP00000320940,ENSP00000325120,ENSP00000344456,ENSP00000357643,ENSP00000363822,ENSP00000401303	APC,AR,AXIN2,CCND1,CDK2,CDK4,CDK6,CTNNB1,EGFR,ERBB2,ESR1,HRAS,KRAS,LOX,MKI67,NCOA1,NCOR1,PGR,PIK3CA,SHC1
GO.0033598	mammary gland epithelial cell proliferation	2	0.00626	ENSP00000206249,ENSP00000227507	CCND1,ESR1
GO.0044706	multi-multicellular organism process	4	0.00629	ENSP00000206249,ENSP00000270202,ENSP00000320940,ENSP00000325120	AKT1,ESR1,NCOA1,PGR
GO.0006807	nitrogen compound metabolic process	16	0.00633	ENSP00000206249,ENSP00000227507,ENSP00000262320,ENSP00000265171,ENSP00000266970,ENSP00000268712,ENSP00000269571,ENSP00000302625,ENSP00000312326,ENSP00000320940,ENSP00000325120,ENSP00000344456,ENSP00000357643,ENSP00000363822,ENSP00000367309,ENSP00000399968	AOC3,AR,AXIN1,AXIN2,CCND1,CDK2,CTNNB1,EGF,ERBB2,ESR1,MAOB,MKI67,NCOA1,NCOA2,NCOR1,PGR
GO.0021537	telencephalon development	4	0.00633	ENSP00000265734,ENSP00000275493,ENSP00000320940,ENSP00000344456	CDK6,CTNNB1,EGFR,NCOA1
GO.0042176	regulation of protein catabolic process	5	0.00633	ENSP00000257430,ENSP00000262320,ENSP00000265171,ENSP00000270202,ENSP00000275493	AKT1,APC,AXIN1,EGF,EGFR
GO.0051091	positive regulation of sequence-specific DNA binding transcription factor activity	4	0.00633	ENSP00000206249,ENSP00000256078,ENSP00000270202,ENSP00000363822	AKT1,AR,ESR1,KRAS
GO.0010605	negative regulation of macromolecule metabolic process	10	0.00688	ENSP00000206249,ENSP00000227507,ENSP00000268712,ENSP00000270202,ENSP00000275493,ENSP00000309845,ENSP00000320940,ENSP00000325120,ENSP00000363822,ENSP00000399968	AKT1,AR,CCND1,EGFR,ESR1,HRAS,NCOA1,NCOA2,NCOR1,PGR
GO.0060070	canonical Wnt signaling pathway	3	0.00688	ENSP00000227507,ENSP00000262320,ENSP00000344456	AXIN1,CCND1,CTNNB1
GO.0010971	positive regulation of G2/M transition of mitotic cell cycle	2	0.00692	ENSP00000227507,ENSP00000257904	CCND1,CDK4
GO.0072498	embryonic skeletal joint development	2	0.00692	ENSP00000262320,ENSP00000344456	AXIN1,CTNNB1
GO.0097306	cellular response to alcohol	3	0.00702	ENSP00000206249,ENSP00000275493,ENSP00000344456	CTNNB1,EGFR,ESR1
GO.0031329	regulation of cellular catabolic process	6	0.00714	ENSP00000257430,ENSP00000262320,ENSP00000263967,ENSP00000265171,ENSP00000268712,ENSP00000270202	AKT1,APC,AXIN1,EGF,NCOR1,PIK3CA
GO.0033138	positive regulation of peptidyl-serine phosphorylation	3	0.00746	ENSP00000262320,ENSP00000263967,ENSP00000270202	AKT1,AXIN1,PIK3CA
GO.0045732	positive regulation of protein catabolic process	4	0.00768	ENSP00000257430,ENSP00000262320,ENSP00000265171,ENSP00000270202	AKT1,APC,AXIN1,EGF
GO.0071157	negative regulation of cell cycle arrest	2	0.00771	ENSP00000227507,ENSP00000257904	CCND1,CDK4
GO.0010948	negative regulation of cell cycle process	4	0.00774	ENSP00000227507,ENSP00000257430,ENSP00000257904,ENSP00000266970	APC,CCND1,CDK2,CDK4
GO.0016055	Wnt signaling pathway	4	0.00774	ENSP00000227507,ENSP00000262320,ENSP00000302625,ENSP00000344456	AXIN1,AXIN2,CCND1,CTNNB1
GO.0032368	regulation of lipid transport	3	0.00784	ENSP00000265171,ENSP00000268712,ENSP00000270202	AKT1,EGF,NCOR1
GO.0042633	hair cycle	3	0.00807	ENSP00000257430,ENSP00000275493,ENSP00000344456	APC,CTNNB1,EGFR
GO.0010629	negative regulation of gene expression	8	0.00829	ENSP00000206249,ENSP00000227507,ENSP00000262320,ENSP00000268712,ENSP00000309845,ENSP00000320940,ENSP00000325120,ENSP00000399968	AXIN1,CCND1,ESR1,HRAS,NCOA1,NCOA2,NCOR1,PGR
GO.2000241	regulation of reproductive process	3	0.00829	ENSP00000206249,ENSP00000257430,ENSP00000344456	APC,CTNNB1,ESR1
GO.0031396	regulation of protein ubiquitination	4	0.00843	ENSP00000257430,ENSP00000262320,ENSP00000265171,ENSP00000266970	APC,AXIN1,CDK2,EGF
GO.0009314	response to radiation	5	0.00848	ENSP00000227507,ENSP00000256078,ENSP00000270202,ENSP00000275493,ENSP00000339007	AKT1,CCND1,EGFR,GRB2,KRAS
GO.0090068	positive regulation of cell cycle process	4	0.00894	ENSP00000227507,ENSP00000257904,ENSP00000265171,ENSP00000266970	CCND1,CDK2,CDK4,EGF
GO.1901990	regulation of mitotic cell cycle phase transition	4	0.0095	ENSP00000227507,ENSP00000257430,ENSP00000257904,ENSP00000266970	APC,CCND1,CDK2,CDK4
GO.0009896	positive regulation of catabolic process	5	0.00953	ENSP00000257430,ENSP00000262320,ENSP00000263967,ENSP00000265171,ENSP00000270202	AKT1,APC,AXIN1,EGF,PIK3CA
GO.0021987	cerebral cortex development	3	0.00983	ENSP00000275493,ENSP00000320940,ENSP00000344456	CTNNB1,EGFR,NCOA1
GO.0051301	cell division	5	0.00989	ENSP00000227507,ENSP00000257430,ENSP00000257904,ENSP00000265734,ENSP00000266970	APC,CCND1,CDK2,CDK4,CDK6
GO.0000122	negative regulation of transcription from RNA polymerase II promoter	6	0.01	ENSP00000227507,ENSP00000262320,ENSP00000268712,ENSP00000320940,ENSP00000344456,ENSP00000399968	AXIN1,CCND1,CTNNB1,NCOA1,NCOA2,NCOR1
GO.0042698	ovulation cycle	3	0.0101	ENSP00000206249,ENSP00000320940,ENSP00000325120	ESR1,NCOA1,PGR
GO.0051094	positive regulation of developmental process	7	0.0106	ENSP00000227507,ENSP00000257430,ENSP00000265171,ENSP00000270202,ENSP00000302625,ENSP00000320940,ENSP00000344456	AKT1,APC,AXIN2,CCND1,CTNNB1,EGF,NCOA1
GO.0007409	axonogenesis	5	0.0108	ENSP00000256078,ENSP00000257430,ENSP00000275493,ENSP00000309845,ENSP00000339007	APC,EGFR,GRB2,HRAS,KRAS
GO.0006810	transport	12	0.0112	ENSP00000227507,ENSP00000262320,ENSP00000263967,ENSP00000265171,ENSP00000266970,ENSP00000309845,ENSP00000312326,ENSP00000339007,ENSP00000340684,ENSP00000344456,ENSP00000363822,ENSP00000399968	AOC3,AR,AXIN1,CCND1,CDK2,CTNNB1,EGF,GRB2,HRAS,MAOA,NCOA2,PIK3CA
GO.0051412	response to corticosterone	2	0.0112	ENSP00000227507,ENSP00000367309	CCND1,MAOB
GO.0060713	labyrinthine layer morphogenesis	2	0.0112	ENSP00000320940,ENSP00000339007	GRB2,NCOA1
GO.0006366	transcription from RNA polymerase II promoter	6	0.0118	ENSP00000206249,ENSP00000268712,ENSP00000270202,ENSP00000320940,ENSP00000325120,ENSP00000363822	AKT1,AR,ESR1,NCOA1,NCOR1,PGR
GO.0022612	gland morphogenesis	3	0.0118	ENSP00000206249,ENSP00000275493,ENSP00000325120	EGFR,ESR1,PGR
GO.0002429	immune response-activating cell surface receptor signaling pathway	4	0.0119	ENSP00000256078,ENSP00000263967,ENSP00000309845,ENSP00000339007	GRB2,HRAS,KRAS,PIK3CA
GO.0030855	epithelial cell differentiation	5	0.012	ENSP00000206249,ENSP00000265734,ENSP00000270202,ENSP00000325120,ENSP00000344456	AKT1,CDK6,CTNNB1,ESR1,PGR
GO.0070201	regulation of establishment of protein localization	6	0.0124	ENSP00000262320,ENSP00000265171,ENSP00000270202,ENSP00000275493,ENSP00000302625,ENSP00000363822	AKT1,AR,AXIN1,AXIN2,EGF,EGFR
GO.0061564	axon development	5	0.0125	ENSP00000256078,ENSP00000257430,ENSP00000275493,ENSP00000309845,ENSP00000339007	APC,EGFR,GRB2,HRAS,KRAS
GO.0071156	regulation of cell cycle arrest	3	0.0125	ENSP00000227507,ENSP00000257904,ENSP00000266970	CCND1,CDK2,CDK4
GO.1901701	cellular response to oxygen-containing compound	6	0.0125	ENSP00000206249,ENSP00000256078,ENSP00000270202,ENSP00000309845,ENSP00000344456,ENSP00000401303	AKT1,CTNNB1,ESR1,HRAS,KRAS,SHC1
GO.2000026	regulation of multicellular organismal development	8	0.0125	ENSP00000206249,ENSP00000227507,ENSP00000257430,ENSP00000265171,ENSP00000265734,ENSP00000302625,ENSP00000320940,ENSP00000344456	APC,AXIN2,CCND1,CDK6,CTNNB1,EGF,ESR1,NCOA1
GO.0048666	neuron development	6	0.0126	ENSP00000256078,ENSP00000257430,ENSP00000275493,ENSP00000309845,ENSP00000339007,ENSP00000401303	APC,EGFR,GRB2,HRAS,KRAS,SHC1
GO.0007610	behavior	5	0.0129	ENSP00000256078,ENSP00000275493,ENSP00000309845,ENSP00000320940,ENSP00000399968	EGFR,HRAS,KRAS,NCOA1,NCOA2
GO.0010800	positive regulation of peptidyl-threonine phosphorylation	2	0.0129	ENSP00000262320,ENSP00000265171	AXIN1,EGF
GO.0044249	cellular biosynthetic process	14	0.0129	ENSP00000206249,ENSP00000227507,ENSP00000263967,ENSP00000265171,ENSP00000266970,ENSP00000268712,ENSP00000269571,ENSP00000320940,ENSP00000325120,ENSP00000340684,ENSP00000344456,ENSP00000363822,ENSP00000367309,ENSP00000399968	AR,CCND1,CDK2,CTNNB1,EGF,ERBB2,ESR1,MAOA,MAOB,NCOA1,NCOA2,NCOR1,PGR,PIK3CA
GO.0045931	positive regulation of mitotic cell cycle	3	0.0129	ENSP00000227507,ENSP00000257904,ENSP00000265171	CCND1,CDK4,EGF
GO.0071364	cellular response to epidermal growth factor stimulus	2	0.0129	ENSP00000270202,ENSP00000275493	AKT1,EGFR
GO.0071392	cellular response to estradiol stimulus	2	0.0129	ENSP00000206249,ENSP00000275493	EGFR,ESR1
GO.1903409	reactive oxygen species biosynthetic process	2	0.0129	ENSP00000270202,ENSP00000367309	AKT1,MAOB
GO.2000008	regulation of protein localization to cell surface	2	0.0129	ENSP00000265171,ENSP00000344456	CTNNB1,EGF
GO.0007176	regulation of epidermal growth factor-activated receptor activity	2	0.0139	ENSP00000265171,ENSP00000401303	EGF,SHC1
GO.0010469	regulation of receptor activity	3	0.0141	ENSP00000265171,ENSP00000399968,ENSP00000401303	EGF,NCOA2,SHC1
GO.0010647	positive regulation of cell communication	8	0.0144	ENSP00000257430,ENSP00000263967,ENSP00000269571,ENSP00000270202,ENSP00000275493,ENSP00000302625,ENSP00000309845,ENSP00000401303	AKT1,APC,AXIN2,EGFR,ERBB2,HRAS,PIK3CA,SHC1
GO.0044070	regulation of anion transport	3	0.0144	ENSP00000268712,ENSP00000270202,ENSP00000367309	AKT1,MAOB,NCOR1
GO.0045471	response to ethanol	3	0.0144	ENSP00000227507,ENSP00000266970,ENSP00000367309	CCND1,CDK2,MAOB
GO.0048667	cell morphogenesis involved in neuron differentiation	5	0.0144	ENSP00000256078,ENSP00000257430,ENSP00000275493,ENSP00000309845,ENSP00000339007	APC,EGFR,GRB2,HRAS,KRAS
GO.0051345	positive regulation of hydrolase activity	6	0.0144	ENSP00000206249,ENSP00000262320,ENSP00000269571,ENSP00000275493,ENSP00000302625,ENSP00000309845	AXIN1,AXIN2,EGFR,ERBB2,ESR1,HRAS
GO.0065008	regulation of biological quality	11	0.0144	ENSP00000227507,ENSP00000257430,ENSP00000257904,ENSP00000265171,ENSP00000266970,ENSP00000268712,ENSP00000302625,ENSP00000320940,ENSP00000340684,ENSP00000344456,ENSP00000401303	APC,AXIN2,CCND1,CDK2,CDK4,CTNNB1,EGF,MAOA,NCOA1,NCOR1,SHC1
GO.1903050	regulation of proteolysis involved in cellular protein catabolic process	4	0.0144	ENSP00000257430,ENSP00000262320,ENSP00000265171,ENSP00000270202	AKT1,APC,AXIN1,EGF
GO.0008584	male gonad development	3	0.0145	ENSP00000206249,ENSP00000227507,ENSP00000320940	CCND1,ESR1,NCOA1
GO.0010038	response to metal ion	4	0.0145	ENSP00000227507,ENSP00000257904,ENSP00000266970,ENSP00000367309	CCND1,CDK2,CDK4,MAOB
GO.0046546	development of primary male sexual characteristics	3	0.0145	ENSP00000206249,ENSP00000227507,ENSP00000320940	CCND1,ESR1,NCOA1
GO.0040011	locomotion	7	0.0146	ENSP00000256078,ENSP00000257430,ENSP00000263967,ENSP00000309845,ENSP00000339007,ENSP00000344456,ENSP00000401303	APC,CTNNB1,GRB2,HRAS,KRAS,PIK3CA,SHC1
GO.0060441	epithelial tube branching involved in lung morphogenesis	2	0.0146	ENSP00000256078,ENSP00000344456	CTNNB1,KRAS
GO.0060669	embryonic placenta morphogenesis	2	0.0146	ENSP00000320940,ENSP00000339007	GRB2,NCOA1
GO.0001655	urogenital system development	4	0.0148	ENSP00000206249,ENSP00000257430,ENSP00000344456,ENSP00000363822	APC,AR,CTNNB1,ESR1
GO.0048511	rhythmic process	4	0.0148	ENSP00000206249,ENSP00000257904,ENSP00000320940,ENSP00000325120	CDK4,ESR1,NCOA1,PGR
GO.0051438	regulation of ubiquitin-protein transferase activity	3	0.0154	ENSP00000257430,ENSP00000262320,ENSP00000266970	APC,AXIN1,CDK2
GO.0043010	camera-type eye development	4	0.0155	ENSP00000257430,ENSP00000257904,ENSP00000266970,ENSP00000344456	APC,CDK2,CDK4,CTNNB1
GO.2000191	regulation of fatty acid transport	2	0.0156	ENSP00000268712,ENSP00000270202	AKT1,NCOR1
GO.0001525	angiogenesis	4	0.0161	ENSP00000263967,ENSP00000265171,ENSP00000344456,ENSP00000401303	CTNNB1,EGF,PIK3CA,SHC1
GO.0048169	regulation of long-term neuronal synaptic plasticity	2	0.0167	ENSP00000256078,ENSP00000309845	HRAS,KRAS
GO.0090279	regulation of calcium ion import	2	0.0167	ENSP00000265171,ENSP00000344456	CTNNB1,EGF
GO.0051340	regulation of ligase activity	3	0.0174	ENSP00000257430,ENSP00000262320,ENSP00000266970	APC,AXIN1,CDK2
GO.0032369	negative regulation of lipid transport	2	0.0178	ENSP00000265171,ENSP00000270202	AKT1,EGF
GO.0009653	anatomical structure morphogenesis	9	0.018	ENSP00000206249,ENSP00000257430,ENSP00000263967,ENSP00000302625,ENSP00000309845,ENSP00000320940,ENSP00000325120,ENSP00000344456,ENSP00000401303	APC,AXIN2,CTNNB1,ESR1,HRAS,NCOA1,PGR,PIK3CA,SHC1
GO.1903707	negative regulation of hemopoiesis	3	0.0186	ENSP00000265734,ENSP00000269571,ENSP00000344456	CDK6,CTNNB1,ERBB2
GO.0030212	hyaluronan metabolic process	2	0.0189	ENSP00000270202,ENSP00000357643	AKT1,MKI67
GO.0043524	negative regulation of neuron apoptotic process	3	0.0189	ENSP00000256078,ENSP00000263967,ENSP00000309845	HRAS,KRAS,PIK3CA
GO.1903792	negative regulation of anion transport	2	0.0189	ENSP00000270202,ENSP00000367309	AKT1,MAOB
GO.0032386	regulation of intracellular transport	5	0.019	ENSP00000262320,ENSP00000265171,ENSP00000270202,ENSP00000275493,ENSP00000302625	AKT1,AXIN1,AXIN2,EGF,EGFR
GO.1903706	regulation of hemopoiesis	4	0.019	ENSP00000257430,ENSP00000265734,ENSP00000269571,ENSP00000344456	APC,CDK6,CTNNB1,ERBB2
GO.0051336	regulation of hydrolase activity	7	0.0195	ENSP00000206249,ENSP00000262320,ENSP00000269571,ENSP00000270202,ENSP00000275493,ENSP00000302625,ENSP00000309845	AKT1,AXIN1,AXIN2,EGFR,ERBB2,ESR1,HRAS
GO.0007219	Notch signaling pathway	3	0.0196	ENSP00000227507,ENSP00000265734,ENSP00000268712	CCND1,CDK6,NCOR1
GO.0015721	bile acid and bile salt transport	2	0.02	ENSP00000320940,ENSP00000399968	NCOA1,NCOA2
GO.0043409	negative regulation of MAPK cascade	3	0.0208	ENSP00000257430,ENSP00000268712,ENSP00000270202	AKT1,APC,NCOR1
GO.0014065	phosphatidylinositol 3-kinase signaling	2	0.0213	ENSP00000263967,ENSP00000269571	ERBB2,PIK3CA
GO.0032434	regulation of proteasomal ubiquitin-dependent protein catabolic process	3	0.0216	ENSP00000257430,ENSP00000262320,ENSP00000270202	AKT1,APC,AXIN1
GO.0043269	regulation of ion transport	5	0.0216	ENSP00000265171,ENSP00000268712,ENSP00000270202,ENSP00000344456,ENSP00000367309	AKT1,CTNNB1,EGF,MAOB,NCOR1
GO.0010942	positive regulation of cell death	5	0.0217	ENSP00000257904,ENSP00000270202,ENSP00000302625,ENSP00000320940,ENSP00000344456	AKT1,AXIN2,CDK4,CTNNB1,NCOA1
GO.0007050	cell cycle arrest	3	0.0224	ENSP00000257430,ENSP00000265734,ENSP00000309845	APC,CDK6,HRAS
GO.0009416	response to light stimulus	4	0.0224	ENSP00000227507,ENSP00000256078,ENSP00000270202,ENSP00000275493	AKT1,CCND1,EGFR,KRAS
GO.0010718	positive regulation of epithelial to mesenchymal transition	2	0.0224	ENSP00000302625,ENSP00000344456	AXIN2,CTNNB1
GO.0031641	regulation of myelination	2	0.0224	ENSP00000270202,ENSP00000344456	AKT1,CTNNB1
GO.0045907	positive regulation of vasoconstriction	2	0.0224	ENSP00000270202,ENSP00000401303	AKT1,SHC1
GO.0007267	cell-cell signaling	6	0.0229	ENSP00000256078,ENSP00000309845,ENSP00000339007,ENSP00000340684,ENSP00000344456,ENSP00000363822	AR,CTNNB1,GRB2,HRAS,KRAS,MAOA
GO.0009967	positive regulation of signal transduction	7	0.0231	ENSP00000257430,ENSP00000269571,ENSP00000270202,ENSP00000275493,ENSP00000302625,ENSP00000309845,ENSP00000401303	AKT1,APC,AXIN2,EGFR,ERBB2,HRAS,SHC1
GO.0009954	proximal/distal pattern formation	2	0.0234	ENSP00000257430,ENSP00000344456	APC,CTNNB1
GO.0031122	cytoplasmic microtubule organization	2	0.0234	ENSP00000257430,ENSP00000262320	APC,AXIN1
GO.0046329	negative regulation of JNK cascade	2	0.0234	ENSP00000268712,ENSP00000270202	AKT1,NCOR1
GO.0046579	positive regulation of Ras protein signal transduction	2	0.0234	ENSP00000256078,ENSP00000309845	HRAS,KRAS
GO.0030335	positive regulation of cell migration	4	0.0236	ENSP00000257430,ENSP00000270202,ENSP00000275493,ENSP00000309845	AKT1,APC,EGFR,HRAS
GO.0051049	regulation of transport	8	0.0236	ENSP00000262320,ENSP00000265171,ENSP00000268712,ENSP00000270202,ENSP00000275493,ENSP00000302625,ENSP00000344456,ENSP00000367309	AKT1,AXIN1,AXIN2,CTNNB1,EGF,EGFR,MAOB,NCOR1
GO.0010608	posttranscriptional regulation of gene expression	4	0.0243	ENSP00000257904,ENSP00000269571,ENSP00000270202,ENSP00000302625	AKT1,AXIN2,CDK4,ERBB2
GO.0006928	movement of cell or subcellular component	7	0.0245	ENSP00000256078,ENSP00000257430,ENSP00000263967,ENSP00000309845,ENSP00000339007,ENSP00000344456,ENSP00000401303	APC,CTNNB1,GRB2,HRAS,KRAS,PIK3CA,SHC1
GO.0007098	centrosome cycle	2	0.0245	ENSP00000266970,ENSP00000344456	CDK2,CTNNB1
GO.0010675	regulation of cellular carbohydrate metabolic process	3	0.0245	ENSP00000268712,ENSP00000270202,ENSP00000399968	AKT1,NCOA2,NCOR1
GO.0031334	positive regulation of protein complex assembly	3	0.0245	ENSP00000257430,ENSP00000339007,ENSP00000344456	APC,CTNNB1,GRB2
GO.0032885	regulation of polysaccharide biosynthetic process	2	0.0245	ENSP00000265171,ENSP00000270202	AKT1,EGF
GO.0006351	transcription, DNA-templated	10	0.0253	ENSP00000206249,ENSP00000227507,ENSP00000268712,ENSP00000269571,ENSP00000270202,ENSP00000320940,ENSP00000325120,ENSP00000344456,ENSP00000363822,ENSP00000399968	AKT1,AR,CCND1,CTNNB1,ERBB2,ESR1,NCOA1,NCOA2,NCOR1,PGR
GO.0010558	negative regulation of macromolecule biosynthetic process	7	0.0257	ENSP00000206249,ENSP00000227507,ENSP00000262320,ENSP00000268712,ENSP00000320940,ENSP00000363822,ENSP00000399968	AR,AXIN1,CCND1,ESR1,NCOA1,NCOA2,NCOR1
GO.0043491	protein kinase B signaling	2	0.0257	ENSP00000263967,ENSP00000270202	AKT1,PIK3CA
GO.0048645	organ formation	2	0.0257	ENSP00000302625,ENSP00000344456	AXIN2,CTNNB1
GO.0060603	mammary gland duct morphogenesis	2	0.0257	ENSP00000206249,ENSP00000325120	ESR1,PGR
GO.0006461	protein complex assembly	6	0.0264	ENSP00000257430,ENSP00000262320,ENSP00000265171,ENSP00000268712,ENSP00000309845,ENSP00000363822	APC,AR,AXIN1,EGF,HRAS,NCOR1
GO.0040008	regulation of growth	5	0.0264	ENSP00000263967,ENSP00000268712,ENSP00000269571,ENSP00000270202,ENSP00000401303	AKT1,ERBB2,NCOR1,PIK3CA,SHC1
GO.0070271	protein complex biogenesis	6	0.0264	ENSP00000257430,ENSP00000262320,ENSP00000265171,ENSP00000268712,ENSP00000309845,ENSP00000363822	APC,AR,AXIN1,EGF,HRAS,NCOR1
GO.2000027	regulation of organ morphogenesis	3	0.0264	ENSP00000206249,ENSP00000257430,ENSP00000344456	APC,CTNNB1,ESR1
GO.0006935	chemotaxis	5	0.0265	ENSP00000256078,ENSP00000263967,ENSP00000275493,ENSP00000309845,ENSP00000339007	EGFR,GRB2,HRAS,KRAS,PIK3CA
GO.0051240	positive regulation of multicellular organismal process	7	0.0265	ENSP00000227507,ENSP00000265171,ENSP00000270202,ENSP00000302625,ENSP00000320940,ENSP00000344456,ENSP00000401303	AKT1,AXIN2,CCND1,CTNNB1,EGF,NCOA1,SHC1
GO.0051495	positive regulation of cytoskeleton organization	3	0.0266	ENSP00000257430,ENSP00000309845,ENSP00000339007	APC,GRB2,HRAS
GO.0090090	negative regulation of canonical Wnt signaling pathway	3	0.0266	ENSP00000257430,ENSP00000262320,ENSP00000302625	APC,AXIN1,AXIN2
GO.0007155	cell adhesion	6	0.0267	ENSP00000265734,ENSP00000268712,ENSP00000275493,ENSP00000312326,ENSP00000344456,ENSP00000401303	AOC3,CDK6,CTNNB1,EGFR,NCOR1,SHC1
GO.0045668	negative regulation of osteoblast differentiation	2	0.0279	ENSP00000265734,ENSP00000302625	AXIN2,CDK6
GO.1903052	positive regulation of proteolysis involved in cellular protein catabolic process	3	0.028	ENSP00000262320,ENSP00000265171,ENSP00000270202	AKT1,AXIN1,EGF
GO.0022607	cellular component assembly	8	0.0282	ENSP00000231004,ENSP00000257430,ENSP00000262320,ENSP00000265171,ENSP00000268712,ENSP00000309845,ENSP00000344456,ENSP00000363822	APC,AR,AXIN1,CTNNB1,EGF,HRAS,LOX,NCOR1
GO.2000145	regulation of cell motility	5	0.0282	ENSP00000257430,ENSP00000265734,ENSP00000270202,ENSP00000275493,ENSP00000309845	AKT1,APC,CDK6,EGFR,HRAS
GO.1901991	negative regulation of mitotic cell cycle phase transition	3	0.0288	ENSP00000227507,ENSP00000257430,ENSP00000266970	APC,CCND1,CDK2
GO.0048646	anatomical structure formation involved in morphogenesis	6	0.0298	ENSP00000262320,ENSP00000263967,ENSP00000265171,ENSP00000339007,ENSP00000344456,ENSP00000401303	AXIN1,CTNNB1,EGF,GRB2,PIK3CA,SHC1
GO.0008285	negative regulation of cell proliferation	5	0.0299	ENSP00000265734,ENSP00000269571,ENSP00000302625,ENSP00000309845,ENSP00000344456	AXIN2,CDK6,CTNNB1,ERBB2,HRAS
GO.0038032	termination of G-protein coupled receptor signaling pathway	2	0.0303	ENSP00000262320,ENSP00000302625	AXIN1,AXIN2
GO.0048514	blood vessel morphogenesis	4	0.0322	ENSP00000263967,ENSP00000265171,ENSP00000344456,ENSP00000401303	CTNNB1,EGF,PIK3CA,SHC1
GO.0007595	lactation	2	0.0329	ENSP00000227507,ENSP00000320940	CCND1,NCOA1
GO.0021795	cerebral cortex cell migration	2	0.0329	ENSP00000275493,ENSP00000344456	CTNNB1,EGFR
GO.0034641	cellular nitrogen compound metabolic process	14	0.0333	ENSP00000206249,ENSP00000227507,ENSP00000262320,ENSP00000265171,ENSP00000266970,ENSP00000268712,ENSP00000269571,ENSP00000302625,ENSP00000320940,ENSP00000325120,ENSP00000344456,ENSP00000357643,ENSP00000363822,ENSP00000399968	AR,AXIN1,AXIN2,CCND1,CDK2,CTNNB1,EGF,ERBB2,ESR1,MKI67,NCOA1,NCOA2,NCOR1,PGR
GO.0008206	bile acid metabolic process	2	0.0342	ENSP00000320940,ENSP00000399968	NCOA1,NCOA2
GO.0007411	axon guidance	4	0.0356	ENSP00000256078,ENSP00000275493,ENSP00000309845,ENSP00000339007	EGFR,GRB2,HRAS,KRAS
GO.2000179	positive regulation of neural precursor cell proliferation	2	0.0356	ENSP00000265171,ENSP00000344456	CTNNB1,EGF
GO.0007565	female pregnancy	3	0.0363	ENSP00000206249,ENSP00000270202,ENSP00000325120	AKT1,ESR1,PGR
GO.0048538	thymus development	2	0.037	ENSP00000257430,ENSP00000344456	APC,CTNNB1
GO.0048806	genitalia development	2	0.037	ENSP00000206249,ENSP00000344456	CTNNB1,ESR1
GO.0032330	regulation of chondrocyte differentiation	2	0.0385	ENSP00000302625,ENSP00000344456	AXIN2,CTNNB1
GO.0048584	positive regulation of response to stimulus	8	0.0388	ENSP00000257430,ENSP00000263967,ENSP00000269571,ENSP00000270202,ENSP00000275493,ENSP00000302625,ENSP00000309845,ENSP00000401303	AKT1,APC,AXIN2,EGFR,ERBB2,HRAS,PIK3CA,SHC1
GO.0008150	biological_process	23	0.0399	ENSP00000206249,ENSP00000227507,ENSP00000256078,ENSP00000257430,ENSP00000257904,ENSP00000262320,ENSP00000263967,ENSP00000265171,ENSP00000265734,ENSP00000266970,ENSP00000268712,ENSP00000269571,ENSP00000270202,ENSP00000275493,ENSP00000302625,ENSP00000309845,ENSP00000312326,ENSP00000320940,ENSP00000339007,ENSP00000344456,ENSP00000363822,ENSP00000399968,ENSP00000401303	AKT1,AOC3,APC,AR,AXIN1,AXIN2,CCND1,CDK2,CDK4,CDK6,CTNNB1,EGF,EGFR,ERBB2,ESR1,GRB2,HRAS,KRAS,NCOA1,NCOA2,NCOR1,PIK3CA,SHC1
GO.0035176	social behavior	2	0.0399	ENSP00000256078,ENSP00000309845	HRAS,KRAS
GO.0048872	homeostasis of number of cells	3	0.04	ENSP00000256078,ENSP00000268712,ENSP00000270202	AKT1,KRAS,NCOR1
GO.0031018	endocrine pancreas development	2	0.0413	ENSP00000265734,ENSP00000270202	AKT1,CDK6
GO.0060425	lung morphogenesis	2	0.0413	ENSP00000256078,ENSP00000344456	CTNNB1,KRAS
GO.0060443	mammary gland morphogenesis	2	0.0413	ENSP00000206249,ENSP00000325120	ESR1,PGR
GO.2000273	positive regulation of receptor activity	2	0.0413	ENSP00000265171,ENSP00000399968	EGF,NCOA2
GO.0031331	positive regulation of cellular catabolic process	4	0.0422	ENSP00000262320,ENSP00000263967,ENSP00000265171,ENSP00000270202	AKT1,AXIN1,EGF,PIK3CA
GO.0045637	regulation of myeloid cell differentiation	3	0.0422	ENSP00000257430,ENSP00000265734,ENSP00000344456	APC,CDK6,CTNNB1
GO.0090003	regulation of establishment of protein localization to plasma membrane	2	0.0427	ENSP00000270202,ENSP00000363822	AKT1,AR
GO.0009895	negative regulation of catabolic process	3	0.0432	ENSP00000257430,ENSP00000270202,ENSP00000275493	AKT1,APC,EGFR
GO.0010035	response to inorganic substance	4	0.0441	ENSP00000227507,ENSP00000257904,ENSP00000367309,ENSP00000401303	CCND1,CDK4,MAOB,SHC1
GO.0046777	protein autophosphorylation	3	0.0443	ENSP00000269571,ENSP00000270202,ENSP00000275493	AKT1,EGFR,ERBB2
GO.0044085	cellular component biogenesis	8	0.0454	ENSP00000231004,ENSP00000257430,ENSP00000262320,ENSP00000265171,ENSP00000268712,ENSP00000309845,ENSP00000344456,ENSP00000363822	APC,AR,AXIN1,CTNNB1,EGF,HRAS,LOX,NCOR1
GO.0070372	regulation of ERK1 and ERK2 cascade	3	0.0475	ENSP00000269571,ENSP00000275493,ENSP00000309845	EGFR,ERBB2,HRAS
GO.0060688	regulation of morphogenesis of a branching structure	2	0.0491	ENSP00000206249,ENSP00000344456	CTNNB1,ESR1
GO.2001234	negative regulation of apoptotic signaling pathway	3	0.0493	ENSP00000270202,ENSP00000344456,ENSP00000363822	AKT1,AR,CTNNB1

## Sheet: GO molecular function
GO molecular function complete	Homo sapiens - REFLIST (21042)	Client Text Box Input (1998)	Client Text Box Input (expected)	Client Text Box Input (over/under)	Client Text Box Input (fold Enrichment)	Client Text Box Input (P-value)
transforming growth factor beta-activated receptor activity (GO:0005024)	10	9	0.95	+	9.48	0.00229
transforming growth factor beta binding (GO:0050431)	19	14	1.8	+	7.76	2.52e-05
platelet-derived growth factor binding (GO:0048407)	11	8	1.04	+	7.66	0.0434
fibronectin binding (GO:0001968)	27	17	2.56	+	6.63	6.74e-06
insulin-like growth factor binding (GO:0005520)	29	17	2.75	+	6.17	1.9e-05
transmembrane receptor protein serine/threonine kinase activity (GO:0004675)	18	10	1.71	+	5.85	0.0388
extracellular matrix binding (GO:0050840)	54	25	5.13	+	4.88	7.6e-07
collagen binding (GO:0005518)	65	30	6.17	+	4.86	1.39e-08
growth factor binding (GO:0019838)	132	59	12.53	+	4.71	3.68e-18
proteoglycan binding (GO:0043394)	38	15	3.61	+	4.16	0.0186
extracellular matrix structural constituent (GO:0005201)	78	29	7.41	+	3.92	4.22e-06
cytokine binding (GO:0019955)	101	36	9.59	+	3.75	1.45e-07
integrin binding (GO:0005178)	113	40	10.73	+	3.73	1.54e-08
transmembrane receptor protein kinase activity (GO:0019199)	82	29	7.79	+	3.72	1.26e-05
SMAD binding (GO:0046332)	75	26	7.12	+	3.65	0.000115
glycosaminoglycan binding (GO:0005539)	213	64	20.22	+	3.16	1.38e-11
heparin binding (GO:0008201)	161	46	15.29	+	3.01	4.61e-07
sulfur compound binding (GO:1901681)	233	61	22.12	+	2.76	1.76e-08
cell adhesion molecule binding (GO:0050839)	456	95	43.3	+	2.19	1.27e-08
calcium ion binding (GO:0005509)	699	141	66.37	+	2.12	8.57e-13
guanyl-nucleotide exchange factor activity (GO:0005085)	322	64	30.57	+	2.09	0.000212
GTPase activator activity (GO:0005096)	287	57	27.25	+	2.09	0.00111
Ras guanyl-nucleotide exchange factor activity (GO:0005088)	248	49	23.55	+	2.08	0.00817
GTPase regulator activity (GO:0030695)	316	59	30.01	+	1.97	0.0048
actin binding (GO:0003779)	412	76	39.12	+	1.94	0.000255
protein complex binding (GO:0032403)	799	147	75.87	+	1.94	2.57e-10
nucleoside-triphosphatase regulator activity (GO:0060589)	353	64	33.52	+	1.91	0.00458
phospholipid binding (GO:0005543)	378	68	35.89	+	1.89	0.00284
protein domain specific binding (GO:0019904)	691	121	65.61	+	1.84	8.55e-07
enzyme activator activity (GO:0008047)	517	88	49.09	+	1.79	0.000774
macromolecular complex binding (GO:0044877)	993	164	94.29	+	1.74	4.4e-08
protein kinase binding (GO:0019901)	576	93	54.69	+	1.7	0.00326
kinase binding (GO:0019900)	658	106	62.48	+	1.7	0.000646
enzyme regulator activity (GO:0030234)	1039	163	98.66	+	1.65	2.02e-06
GTPase binding (GO:0051020)	625	97	59.35	+	1.63	0.00984
lipid binding (GO:0008289)	662	101	62.86	+	1.61	0.0126
receptor binding (GO:0005102)	1572	233	149.27	+	1.56	6.49e-08
protein homodimerization activity (GO:0042803)	798	117	75.77	+	1.54	0.0136
molecular function regulator (GO:0098772)	1828	260	173.57	+	1.5	2.27e-07
regulatory region nucleic acid binding (GO:0001067)	853	121	80.99	+	1.49	0.041
protein dimerization activity (GO:0046983)	1234	175	117.17	+	1.49	0.000474
cytoskeletal protein binding (GO:0008092)	875	124	83.08	+	1.49	0.0335
enzyme binding (GO:0019899)	2178	293	206.81	+	1.42	3.63e-06
identical protein binding (GO:0042802)	1683	222	159.81	+	1.39	0.00203
metal ion binding (GO:0046872)	4158	548	394.81	+	1.39	2.92e-13
cation binding (GO:0043169)	4248	554	403.36	+	1.37	1.38e-12
anion binding (GO:0043168)	2752	357	261.31	+	1.37	2.4e-06
carbohydrate derivative binding (GO:0097367)	2203	282	209.18	+	1.35	0.000664
ion binding (GO:0043167)	6207	771	589.37	+	1.31	6.99e-15
catalytic activity, acting on a protein (GO:0140096)	2352	285	223.33	+	1.28	0.0426
protein binding (GO:0005515)	11462	1357	1088.35	+	1.25	3.68e-31
binding (GO:0005488)	14769	1633	1402.36	+	1.16	6.77e-29
molecular_function (GO:0003674)	17376	1812	1649.9	+	1.1	1.41e-21
RNA binding (GO:0003723)	1643	101	156.01	-	0.65	0.00226
Unclassified (UNCLASSIFIED)	3666	186	348.1	-	0.53	0
catalytic activity, acting on RNA (GO:0140098)	381	12	36.18	-	0.33	0.0081
structural constituent of ribosome (GO:0003735)	169	1	16.05	-	< 0.2	0.00544

## Sheet: GO biological process
GO biological process complete	Homo sapiens - REFLIST (21042)	Client Text Box Input (1998)	Client Text Box Input (expected)	Client Text Box Input (over/under)	Client Text Box Input (fold Enrichment)	Client Text Box Input (P-value)
retina vasculature development in camera-type eye (GO:0061298)	16	10	1.52	+	6.58	0.0389
kidney vasculature development (GO:0061440)	21	13	1.99	+	6.52	0.00169
renal system vasculature development (GO:0061437)	21	13	1.99	+	6.52	0.00169
glomerulus vasculature development (GO:0072012)	19	11	1.8	+	6.1	0.0271
regulation of vascular endothelial growth factor receptor signaling pathway (GO:0030947)	27	14	2.56	+	5.46	0.00472
chondroitin sulfate biosynthetic process (GO:0030206)	24	12	2.28	+	5.27	0.0429
substrate adhesion-dependent cell spreading (GO:0034446)	38	18	3.61	+	4.99	0.000461
negative regulation of endothelial cell proliferation (GO:0001937)	33	15	3.13	+	4.79	0.00952
glomerulus development (GO:0032835)	53	24	5.03	+	4.77	7.25e-06
chondroitin sulfate metabolic process (GO:0030204)	40	18	3.8	+	4.74	0.000973
sprouting angiogenesis (GO:0002040)	46	20	4.37	+	4.58	0.000342
aorta development (GO:0035904)	44	19	4.18	+	4.55	0.000819
chondroitin sulfate proteoglycan metabolic process (GO:0050654)	42	18	3.99	+	4.51	0.00196
collagen fibril organization (GO:0030199)	42	18	3.99	+	4.51	0.00196
endothelium development (GO:0003158)	87	36	8.26	+	4.36	6.58e-09
heart valve development (GO:0003170)	39	16	3.7	+	4.32	0.0156
regulation of cartilage development (GO:0061035)	62	25	5.89	+	4.25	3.23e-05
regulation of chondrocyte differentiation (GO:0032330)	45	18	4.27	+	4.21	0.00521
positive regulation of endothelial cell proliferation (GO:0001938)	73	29	6.93	+	4.18	2.66e-06
regulation of smooth muscle cell migration (GO:0014910)	58	23	5.51	+	4.18	0.000179
regulation of endothelial cell proliferation (GO:0001936)	101	40	9.59	+	4.17	1.41e-09
vasculogenesis (GO:0001570)	66	26	6.27	+	4.15	2.54e-05
regulation of mononuclear cell migration (GO:0071675)	42	16	3.99	+	4.01	0.0394
negative regulation of cell-substrate adhesion (GO:0010812)	53	20	5.03	+	3.97	0.00312
regulation of blood vessel endothelial cell migration (GO:0043535)	59	22	5.6	+	3.93	0.00102
positive regulation of response to wounding (GO:1903036)	57	21	5.41	+	3.88	0.00237
angiogenesis (GO:0001525)	295	108	28.01	+	3.86	2.4e-27
positive regulation of endothelial cell migration (GO:0010595)	74	27	7.03	+	3.84	6.19e-05
collagen metabolic process (GO:0032963)	80	29	7.6	+	3.82	2.02e-05
positive regulation of wound healing (GO:0090303)	50	18	4.75	+	3.79	0.0224
extracellular matrix organization (GO:0030198)	309	111	29.34	+	3.78	1.69e-27
extracellular structure organization (GO:0043062)	310	111	29.44	+	3.77	2.21e-27
blood vessel morphogenesis (GO:0048514)	380	136	36.08	+	3.77	3.24e-34
proteoglycan biosynthetic process (GO:0030166)	56	20	5.32	+	3.76	0.0072
endothelial cell differentiation (GO:0045446)	73	26	6.93	+	3.75	0.000187
artery development (GO:0060840)	76	27	7.22	+	3.74	0.000106
collagen catabolic process (GO:0030574)	65	23	6.17	+	3.73	0.00132
multicellular organismal macromolecule metabolic process (GO:0044259)	85	30	8.07	+	3.72	1.97e-05
outflow tract morphogenesis (GO:0003151)	68	24	6.46	+	3.72	0.000751
blood vessel development (GO:0001568)	462	163	43.87	+	3.72	6.13e-41
positive regulation of angiogenesis (GO:0045766)	134	47	12.72	+	3.69	8.34e-10
vasculature development (GO:0001944)	486	170	46.15	+	3.68	2.19e-42
negative regulation of angiogenesis (GO:0016525)	81	28	7.69	+	3.64	0.000102
cardiovascular system development (GO:0072358)	496	171	47.1	+	3.63	7.45e-42
multicellular organismal catabolic process (GO:0044243)	73	25	6.93	+	3.61	0.000716
proteoglycan metabolic process (GO:0006029)	82	28	7.79	+	3.6	0.000131
regulation of adherens junction organization (GO:1903391)	56	19	5.32	+	3.57	0.0277
negative regulation of blood vessel morphogenesis (GO:2000181)	83	28	7.88	+	3.55	0.000169
positive regulation of vasculature development (GO:1904018)	151	50	14.34	+	3.49	1.14e-09
artery morphogenesis (GO:0048844)	58	19	5.51	+	3.45	0.0453
regulation of endothelial cell migration (GO:0010594)	123	40	11.68	+	3.42	5.1e-07
regulation of angiogenesis (GO:0045765)	232	75	22.03	+	3.4	3.47e-15
platelet degranulation (GO:0002576)	127	41	12.06	+	3.4	3.67e-07
integrin-mediated signaling pathway (GO:0007229)	90	29	8.55	+	3.39	0.00025
regulation of cell-matrix adhesion (GO:0001952)	100	32	9.5	+	3.37	5.81e-05
negative regulation of transforming growth factor beta receptor signaling pathway (GO:0030512)	69	22	6.55	+	3.36	0.0131
regulation of coagulation (GO:0050818)	91	29	8.64	+	3.36	0.000315
positive regulation of phosphatidylinositol 3-kinase signaling (GO:0014068)	66	21	6.27	+	3.35	0.0232
regulation of transforming growth factor beta receptor signaling pathway (GO:0017015)	101	32	9.59	+	3.34	7.31e-05
response to transforming growth factor beta (GO:0071559)	149	47	14.15	+	3.32	3.13e-08
regulation of hemostasis (GO:1900046)	86	27	8.17	+	3.31	0.00122
regulation of blood coagulation (GO:0030193)	86	27	8.17	+	3.31	0.00122
regulation of cellular response to growth factor stimulus (GO:0090287)	249	78	23.64	+	3.3	3.92e-15
cellular response to transforming growth factor beta stimulus (GO:0071560)	144	45	13.67	+	3.29	1.2e-07
mucopolysaccharide metabolic process (GO:1903510)	109	34	10.35	+	3.29	3.72e-05
negative regulation of vasculature development (GO:1901343)	90	28	8.55	+	3.28	0.00087
vascular endothelial growth factor receptor signaling pathway (GO:0048010)	74	23	7.03	+	3.27	0.0117
regulation of cellular response to transforming growth factor beta stimulus (GO:1903844)	103	32	9.78	+	3.27	0.000114
negative regulation of cellular response to transforming growth factor beta stimulus (GO:1903845)	71	22	6.74	+	3.26	0.0206
regulation of cell junction assembly (GO:1901888)	81	25	7.69	+	3.25	0.00472
regulation of vasculature development (GO:1901342)	256	79	24.31	+	3.25	5.37e-15
cell-substrate adhesion (GO:0031589)	164	50	15.57	+	3.21	2.17e-08
multicellular organism metabolic process (GO:0044236)	105	32	9.97	+	3.21	0.000177
positive regulation of epithelial cell migration (GO:0010634)	115	35	10.92	+	3.21	4.08e-05
regulation of wound healing (GO:0061041)	135	41	12.82	+	3.2	2.18e-06
regulation of glucose transport (GO:0010827)	73	22	6.93	+	3.17	0.0318
positive regulation of ossification (GO:0045778)	83	25	7.88	+	3.17	0.00726
regulation of cell-substrate adhesion (GO:0010810)	186	56	17.66	+	3.17	1.77e-09
positive regulation of cell-substrate adhesion (GO:0010811)	110	33	10.44	+	3.16	0.000154
negative regulation of cellular response to growth factor stimulus (GO:0090288)	131	39	12.44	+	3.14	1.01e-05
negative regulation of transmembrane receptor protein serine/threonine kinase signaling pathway (GO:0090101)	108	32	10.25	+	3.12	0.000332
regulation of epithelial cell migration (GO:0010632)	183	54	17.38	+	3.11	1.01e-08
bone development (GO:0060348)	171	50	16.24	+	3.08	9.3e-08
cardiac septum development (GO:0003279)	96	28	9.12	+	3.07	0.0031
regulation of response to wounding (GO:1903034)	158	46	15	+	3.07	7.01e-07
circulatory system development (GO:0072359)	807	232	76.63	+	3.03	3.92e-45
nephron development (GO:0072006)	122	35	11.58	+	3.02	0.000172
positive regulation of endocytosis (GO:0045807)	122	35	11.58	+	3.02	0.000172
transforming growth factor beta receptor signaling pathway (GO:0007179)	95	27	9.02	+	2.99	0.00803
tissue remodeling (GO:0048771)	92	26	8.74	+	2.98	0.014
regulation of actin filament bundle assembly (GO:0032231)	89	25	8.45	+	2.96	0.0244
negative regulation of cell migration (GO:0030336)	228	64	21.65	+	2.96	7.55e-10
regulation of actomyosin structure organization (GO:0110020)	86	24	8.17	+	2.94	0.0424
negative regulation of cellular component movement (GO:0051271)	259	72	24.59	+	2.93	3.45e-11
positive regulation of cell migration (GO:0030335)	425	118	40.36	+	2.92	5.52e-20
cell-matrix adhesion (GO:0007160)	120	33	11.39	+	2.9	0.00111
ossification (GO:0001503)	249	68	23.64	+	2.88	4.48e-10
glycosaminoglycan biosynthetic process (GO:0006024)	103	28	9.78	+	2.86	0.0119
palate development (GO:0060021)	92	25	8.74	+	2.86	0.0427
negative regulation of cell motility (GO:2000146)	243	66	23.07	+	2.86	1.34e-09
regulation of chemotaxis (GO:0050920)	181	49	17.19	+	2.85	1.92e-06
regulation of cell migration (GO:0030334)	724	196	68.75	+	2.85	6.37e-34
aminoglycan biosynthetic process (GO:0006023)	104	28	9.88	+	2.84	0.0142
negative regulation of epithelial cell proliferation (GO:0050680)	119	32	11.3	+	2.83	0.00276
positive regulation of cell motility (GO:2000147)	443	119	42.06	+	2.83	4.93e-19
receptor metabolic process (GO:0043112)	97	26	9.21	+	2.82	0.0355
developmental growth involved in morphogenesis (GO:0060560)	112	30	10.63	+	2.82	0.00684
formation of primary germ layer (GO:0001704)	116	31	11.01	+	2.81	0.00475
cardiac chamber morphogenesis (GO:0003206)	120	32	11.39	+	2.81	0.00329
connective tissue development (GO:0061448)	199	53	18.9	+	2.8	6.38e-07
positive regulation of cellular component movement (GO:0051272)	455	121	43.2	+	2.8	4.73e-19
actomyosin structure organization (GO:0031032)	98	26	9.31	+	2.79	0.0424
negative regulation of locomotion (GO:0040013)	274	72	26.02	+	2.77	5.09e-10
heart morphogenesis (GO:0003007)	225	59	21.36	+	2.76	1.01e-07
cardiac chamber development (GO:0003205)	155	40	14.72	+	2.72	0.000294
cartilage development (GO:0051216)	152	39	14.43	+	2.7	0.000501
osteoblast differentiation (GO:0001649)	121	31	11.49	+	2.7	0.0112
positive regulation of epithelial cell proliferation (GO:0050679)	168	43	15.95	+	2.7	0.000115
regulation of transmembrane receptor protein serine/threonine kinase signaling pathway (GO:0090092)	215	55	20.41	+	2.69	1.2e-06
positive regulation of chemotaxis (GO:0050921)	133	34	12.63	+	2.69	0.00372
positive regulation of locomotion (GO:0040017)	475	121	45.1	+	2.68	1.42e-17
regulation of cell motility (GO:2000145)	778	198	73.87	+	2.68	8.86e-31
heart development (GO:0007507)	477	121	45.29	+	2.67	1.98e-17
lung development (GO:0030324)	170	43	16.14	+	2.66	0.00016
regulation of ossification (GO:0030278)	182	46	17.28	+	2.66	5.33e-05
positive regulation of leukocyte migration (GO:0002687)	123	31	11.68	+	2.65	0.0156
cell junction assembly (GO:0034329)	139	35	13.2	+	2.65	0.00357
ameboidal-type cell migration (GO:0001667)	147	37	13.96	+	2.65	0.00171
regulation of leukocyte migration (GO:0002685)	171	43	16.24	+	2.65	0.000188
positive regulation of cytokine secretion (GO:0050715)	116	29	11.01	+	2.63	0.0383
cell junction organization (GO:0034330)	200	50	18.99	+	2.63	1.69e-05
skeletal system development (GO:0001501)	469	117	44.53	+	2.63	3.24e-16
regulation of cellular component movement (GO:0051270)	852	212	80.9	+	2.62	6.8e-32
negative regulation of protein serine/threonine kinase activity (GO:0071901)	125	31	11.87	+	2.61	0.0215
regulation of fat cell differentiation (GO:0045598)	117	29	11.11	+	2.61	0.045
respiratory tube development (GO:0030323)	174	43	16.52	+	2.6	0.000303
glycosaminoglycan metabolic process (GO:0030203)	154	38	14.62	+	2.6	0.00191
regulation of epithelial cell proliferation (GO:0050678)	299	73	28.39	+	2.57	1.07e-08
kidney development (GO:0001822)	254	62	24.12	+	2.57	5.24e-07
renal system development (GO:0072001)	271	66	25.73	+	2.56	1.4e-07
transmembrane receptor protein serine/threonine kinase signaling pathway (GO:0007178)	193	47	18.33	+	2.56	0.000111
regulation of endocytosis (GO:0030100)	218	53	20.7	+	2.56	1.43e-05
regulation of cell shape (GO:0008360)	144	35	13.67	+	2.56	0.00784
regulation of locomotion (GO:0040012)	848	206	80.52	+	2.56	1.7e-29
regulation of cytokine secretion (GO:0050707)	173	42	16.43	+	2.56	0.000697
mesenchymal cell differentiation (GO:0048762)	132	32	12.53	+	2.55	0.0237
aminoglycan metabolic process (GO:0006022)	161	39	15.29	+	2.55	0.0021
mesenchyme development (GO:0060485)	192	46	18.23	+	2.52	0.000252
response to wounding (GO:0009611)	558	132	52.98	+	2.49	9.56e-17
negative regulation of cell adhesion (GO:0007162)	237	56	22.5	+	2.49	1.35e-05
urogenital system development (GO:0001655)	305	72	28.96	+	2.49	6.85e-08
wound healing (GO:0042060)	467	110	44.34	+	2.48	2.33e-13
respiratory system development (GO:0060541)	196	46	18.61	+	2.47	0.000454
cell adhesion (GO:0007155)	869	203	82.51	+	2.46	7.79e-27
biological adhesion (GO:0022610)	874	204	82.99	+	2.46	6.1e-27
cardiac muscle tissue development (GO:0048738)	155	36	14.72	+	2.45	0.0153
cellular response to growth factor stimulus (GO:0071363)	472	109	44.82	+	2.43	1.22e-12
anatomical structure formation involved in morphogenesis (GO:0048646)	836	192	79.38	+	2.42	2.67e-24
response to growth factor (GO:0070848)	501	115	47.57	+	2.42	2.65e-13
cell-cell junction organization (GO:0045216)	170	39	16.14	+	2.42	0.00777
skeletal system morphogenesis (GO:0048705)	214	49	20.32	+	2.41	0.000354
morphogenesis of a branching epithelium (GO:0061138)	158	36	15	+	2.4	0.0232
epithelial cell development (GO:0002064)	182	41	17.28	+	2.37	0.0065
cellular response to acid chemical (GO:0071229)	197	44	18.71	+	2.35	0.00327
response to mechanical stimulus (GO:0009612)	215	48	20.41	+	2.35	0.001
regulation of Ras protein signal transduction (GO:0046578)	215	48	20.41	+	2.35	0.001
regulation of MAP kinase activity (GO:0043405)	336	75	31.9	+	2.35	3.19e-07
receptor-mediated endocytosis (GO:0006898)	238	53	22.6	+	2.35	0.000245
muscle organ development (GO:0007517)	288	64	27.35	+	2.34	1.01e-05
morphogenesis of a branching structure (GO:0001763)	167	37	15.86	+	2.33	0.0317
regulation of small GTPase mediated signal transduction (GO:0051056)	316	70	30.01	+	2.33	1.95e-06
regulation of actin filament-based process (GO:0032970)	340	75	32.28	+	2.32	5.38e-07
myeloid cell differentiation (GO:0030099)	195	43	18.52	+	2.32	0.00611
blood coagulation (GO:0007596)	295	65	28.01	+	2.32	1.04e-05
hemostasis (GO:0007599)	300	66	28.49	+	2.32	8.27e-06
coagulation (GO:0050817)	297	65	28.2	+	2.3	1.35e-05
muscle tissue development (GO:0060537)	293	64	27.82	+	2.3	1.93e-05
regulation of protein serine/threonine kinase activity (GO:0071900)	492	107	46.72	+	2.29	1.07e-10
positive regulation of protein serine/threonine kinase activity (GO:0071902)	350	75	33.23	+	2.26	1.91e-06
muscle structure development (GO:0061061)	462	99	43.87	+	2.26	2.49e-09
positive regulation of MAP kinase activity (GO:0043406)	263	56	24.97	+	2.24	0.000435
regulation of anatomical structure morphogenesis (GO:0022603)	968	206	91.91	+	2.24	2.96e-22
cell morphogenesis involved in differentiation (GO:0000904)	500	106	47.48	+	2.23	6.83e-10
positive regulation of response to external stimulus (GO:0032103)	279	59	26.49	+	2.23	0.000243
striated muscle tissue development (GO:0014706)	279	59	26.49	+	2.23	0.000243
regulation of actin cytoskeleton organization (GO:0032956)	298	63	28.3	+	2.23	8.44e-05
negative regulation of protein kinase activity (GO:0006469)	249	52	23.64	+	2.2	0.00228
enzyme linked receptor protein signaling pathway (GO:0007167)	714	149	67.8	+	2.2	1.87e-14
cell morphogenesis (GO:0000902)	632	131	60.01	+	2.18	3.85e-12
negative regulation of cell proliferation (GO:0008285)	665	136	63.14	+	2.15	2.88e-12
cell migration (GO:0016477)	828	169	78.62	+	2.15	6.9e-16
developmental growth (GO:0048589)	353	72	33.52	+	2.15	3.25e-05
regulation of myeloid cell differentiation (GO:0045637)	221	45	20.98	+	2.14	0.0267
tissue morphogenesis (GO:0048729)	521	106	49.47	+	2.14	7.97e-09
cell-cell adhesion (GO:0098609)	433	88	41.11	+	2.14	7.33e-07
regulated exocytosis (GO:0045055)	685	139	65.04	+	2.14	2.45e-12
tube development (GO:0035295)	559	113	53.08	+	2.13	2.08e-09
regulation of cell adhesion (GO:0030155)	677	136	64.28	+	2.12	1.11e-11
negative regulation of response to external stimulus (GO:0032102)	269	54	25.54	+	2.11	0.00446
growth (GO:0040007)	419	84	39.79	+	2.11	3.69e-06
anatomical structure morphogenesis (GO:0009653)	2013	403	191.14	+	2.11	2.27e-42
negative regulation of kinase activity (GO:0033673)	267	53	25.35	+	2.09	0.00784
positive regulation of MAPK cascade (GO:0043410)	499	99	47.38	+	2.09	1.79e-07
regulation of peptidyl-tyrosine phosphorylation (GO:0050730)	232	46	22.03	+	2.09	0.041
negative regulation of protein phosphorylation (GO:0001933)	409	81	38.84	+	2.09	1.29e-05
positive regulation of cell adhesion (GO:0045785)	404	80	38.36	+	2.09	1.64e-05
negative regulation of immune system process (GO:0002683)	404	80	38.36	+	2.09	1.64e-05
positive regulation of cell differentiation (GO:0045597)	886	175	84.13	+	2.08	3.5e-15
transmembrane receptor protein tyrosine kinase signaling pathway (GO:0007169)	517	102	49.09	+	2.08	1.2e-07
response to oxygen levels (GO:0070482)	371	73	35.23	+	2.07	0.000107
cellular response to external stimulus (GO:0071496)	300	59	28.49	+	2.07	0.00262
regulation of response to external stimulus (GO:0032101)	734	144	69.7	+	2.07	9.98e-12
regulation of actin filament organization (GO:0110053)	240	47	22.79	+	2.06	0.0445
hemopoiesis (GO:0030097)	526	103	49.95	+	2.06	1.45e-07
cellular component morphogenesis (GO:0032989)	726	142	68.94	+	2.06	2.01e-11
negative regulation of developmental process (GO:0051093)	863	168	81.94	+	2.05	7.12e-14
regulation of cell morphogenesis (GO:0022604)	438	85	41.59	+	2.04	1.29e-05
animal organ morphogenesis (GO:0009887)	882	171	83.75	+	2.04	5.16e-14
regulation of leukocyte differentiation (GO:1902105)	258	50	24.5	+	2.04	0.03
regulation of GTPase activity (GO:0043087)	721	139	68.46	+	2.03	1.18e-10
regulation of body fluid levels (GO:0050878)	498	96	47.29	+	2.03	1.58e-06
circulatory system process (GO:0003013)	379	73	35.99	+	2.03	0.000245
exocytosis (GO:0006887)	769	148	73.02	+	2.03	1.79e-11
regulation of inflammatory response (GO:0050727)	338	65	32.09	+	2.03	0.00146
leukocyte differentiation (GO:0002521)	307	59	29.15	+	2.02	0.00542
small GTPase mediated signal transduction (GO:0007264)	276	53	26.21	+	2.02	0.0201
response to decreased oxygen levels (GO:0036293)	349	67	33.14	+	2.02	0.00101
hematopoietic or lymphoid organ development (GO:0048534)	573	110	54.41	+	2.02	9.35e-08
regulation of cell growth (GO:0001558)	387	74	36.75	+	2.01	0.000262
positive regulation of GTPase activity (GO:0043547)	665	127	63.14	+	2.01	3.21e-09
positive regulation of developmental process (GO:0051094)	1231	235	116.89	+	2.01	1.06e-19
chemotaxis (GO:0006935)	503	96	47.76	+	2.01	2.62e-06
taxis (GO:0042330)	503	96	47.76	+	2.01	2.62e-06
negative regulation of phosphorylation (GO:0042326)	447	85	42.44	+	2	3.21e-05
locomotion (GO:0040011)	1169	221	111	+	1.99	8.38e-18
negative regulation of multicellular organismal process (GO:0051241)	1055	199	100.18	+	1.99	1.41e-15
regulation of multicellular organismal development (GO:2000026)	1820	343	172.81	+	1.98	6.46e-30
response to acid chemical (GO:0001101)	330	62	31.33	+	1.98	0.00592
endocytosis (GO:0006897)	570	107	54.12	+	1.98	6.28e-07
localization of cell (GO:0051674)	931	174	88.4	+	1.97	7.55e-13
cell motility (GO:0048870)	931	174	88.4	+	1.97	7.55e-13
immune system development (GO:0002520)	605	113	57.45	+	1.97	2.45e-07
positive regulation of neuron differentiation (GO:0045666)	332	62	31.52	+	1.97	0.00719
cellular response to organonitrogen compound (GO:0071417)	482	90	45.77	+	1.97	2.62e-05
blood circulation (GO:0008015)	375	70	35.61	+	1.97	0.00147
secretion by cell (GO:0032940)	959	179	91.06	+	1.97	2.96e-13
regulation of MAPK cascade (GO:0043408)	697	130	66.18	+	1.96	8.31e-09
regulation of neuron projection development (GO:0010975)	429	80	40.73	+	1.96	0.000207
positive regulation of cell projection organization (GO:0031346)	338	63	32.09	+	1.96	0.00626
regulation of developmental process (GO:0050793)	2372	442	225.23	+	1.96	1.76e-39
negative regulation of cell differentiation (GO:0045596)	651	121	61.81	+	1.96	6.48e-08
negative regulation of signal transduction (GO:0009968)	1164	216	110.53	+	1.95	2.12e-16
morphogenesis of an epithelium (GO:0002009)	415	77	39.41	+	1.95	0.000459
axon development (GO:0061564)	378	70	35.89	+	1.95	0.00196
inflammatory response (GO:0006954)	465	86	44.15	+	1.95	8.93e-05
response to hypoxia (GO:0001666)	341	63	32.38	+	1.95	0.00832
vesicle organization (GO:0016050)	320	59	30.38	+	1.94	0.0193
embryo development (GO:0009790)	923	170	87.64	+	1.94	6.34e-12
regulation of cell differentiation (GO:0045595)	1680	309	159.52	+	1.94	1.21e-24
axonogenesis (GO:0007409)	348	64	33.04	+	1.94	0.00794
cell morphogenesis involved in neuron differentiation (GO:0048667)	403	74	38.27	+	1.93	0.00123
leukocyte migration (GO:0050900)	317	58	30.1	+	1.93	0.0293
negative regulation of response to stimulus (GO:0048585)	1460	267	138.63	+	1.93	2.61e-20
regulation of supramolecular fiber organization (GO:1902903)	307	56	29.15	+	1.92	0.0467
tissue development (GO:0009888)	1658	302	157.43	+	1.92	2.67e-23
in utero embryonic development (GO:0001701)	325	59	30.86	+	1.91	0.0306
embryonic morphogenesis (GO:0048598)	562	102	53.36	+	1.91	1.01e-05
positive regulation of multicellular organismal process (GO:0051240)	1505	273	142.9	+	1.91	2.31e-20
negative regulation of signaling (GO:0023057)	1268	230	120.4	+	1.91	1.6e-16
plasma membrane bounded cell projection morphogenesis (GO:0120039)	458	83	43.49	+	1.91	0.000376
negative regulation of cell communication (GO:0010648)	1264	229	120.02	+	1.91	2.25e-16
positive regulation of protein phosphorylation (GO:0001934)	933	169	88.59	+	1.91	3.25e-11
positive regulation of phosphorylation (GO:0042327)	979	177	92.96	+	1.9	8.11e-12
regulation of protein kinase activity (GO:0045859)	780	141	74.06	+	1.9	8.17e-09
positive regulation of cell death (GO:0010942)	653	118	62	+	1.9	6.37e-07
cellular response to nitrogen compound (GO:1901699)	570	103	54.12	+	1.9	1.05e-05
response to molecule of bacterial origin (GO:0002237)	321	58	30.48	+	1.9	0.0422
positive regulation of kinase activity (GO:0033674)	548	99	52.03	+	1.9	2.23e-05
regulation of vesicle-mediated transport (GO:0060627)	471	85	44.72	+	1.9	0.00031
positive regulation of protein kinase activity (GO:0045860)	510	92	48.43	+	1.9	8.7e-05
import into cell (GO:0098657)	623	112	59.16	+	1.89	2.61e-06
positive regulation of phosphorus metabolic process (GO:0010562)	1102	198	104.64	+	1.89	2.51e-13
positive regulation of phosphate metabolic process (GO:0045937)	1102	198	104.64	+	1.89	2.51e-13
cell projection morphogenesis (GO:0048858)	462	83	43.87	+	1.89	0.000539
negative regulation of transport (GO:0051051)	479	86	45.48	+	1.89	0.000321
regulation of cell projection organization (GO:0031344)	585	105	55.55	+	1.89	1.02e-05
secretion (GO:0046903)	1065	191	101.12	+	1.89	1.15e-12
regulation of plasma membrane bounded cell projection organization (GO:0120035)	575	103	54.6	+	1.89	1.63e-05
regulation of kinase activity (GO:0043549)	843	151	80.05	+	1.89	2.43e-09
actin filament-based process (GO:0030029)	503	90	47.76	+	1.88	0.000181
regulation of cell proliferation (GO:0042127)	1594	285	151.36	+	1.88	1.56e-20
negative regulation of phosphate metabolic process (GO:0045936)	577	103	54.79	+	1.88	1.95e-05
positive regulation of hydrolase activity (GO:0051345)	975	174	92.58	+	1.88	4.49e-11
neuron projection morphogenesis (GO:0048812)	454	81	43.11	+	1.88	0.00102
negative regulation of phosphorus metabolic process (GO:0010563)	578	103	54.88	+	1.88	2.13e-05
regulation of protein secretion (GO:0050708)	421	75	39.98	+	1.88	0.00314
positive regulation of neurogenesis (GO:0050769)	416	74	39.5	+	1.87	0.00395
response to peptide hormone (GO:0043434)	373	66	35.42	+	1.86	0.0192
actin cytoskeleton organization (GO:0030036)	430	76	40.83	+	1.86	0.00352
positive regulation of intracellular signal transduction (GO:1902533)	940	166	89.26	+	1.86	4.72e-10
regulation of cell development (GO:0060284)	827	146	78.53	+	1.86	1.75e-08
response to peptide (GO:1901652)	442	78	41.97	+	1.86	0.00264
glycoprotein metabolic process (GO:0009100)	391	69	37.13	+	1.86	0.0125
signal transduction by protein phosphorylation (GO:0023014)	414	73	39.31	+	1.86	0.00644
cell part morphogenesis (GO:0032990)	483	85	45.86	+	1.85	0.000883
regulation of multicellular organismal process (GO:0051239)	2792	491	265.11	+	1.85	3.3e-38
regulation of protein phosphorylation (GO:0001932)	1355	238	128.66	+	1.85	1.49e-15
myeloid leukocyte activation (GO:0002274)	566	99	53.74	+	1.84	0.000106
cellular response to endogenous stimulus (GO:0071495)	1105	193	104.92	+	1.84	9.81e-12
regulation of neuron differentiation (GO:0045664)	579	101	54.98	+	1.84	8.65e-05
regulation of peptide secretion (GO:0002791)	448	78	42.54	+	1.83	0.00439
positive regulation of cell development (GO:0010720)	483	84	45.86	+	1.83	0.00169
cell activation (GO:0001775)	1026	178	97.42	+	1.83	2.5e-10
positive regulation of secretion (GO:0051047)	388	67	36.84	+	1.82	0.0354
regulation of cytoskeleton organization (GO:0051493)	459	79	43.58	+	1.81	0.00572
cell activation involved in immune response (GO:0002263)	611	105	58.02	+	1.81	9.3e-05
regulation of growth (GO:0040008)	641	110	60.86	+	1.81	4.46e-05
response to inorganic substance (GO:0010035)	478	82	45.39	+	1.81	0.00401
response to endogenous stimulus (GO:0009719)	1376	236	130.66	+	1.81	3.38e-14
negative regulation of intracellular signal transduction (GO:1902532)	490	84	46.53	+	1.81	0.003
head development (GO:0060322)	725	124	68.84	+	1.8	5.63e-06
positive regulation of signal transduction (GO:0009967)	1480	253	140.53	+	1.8	2.59e-15
cell proliferation (GO:0008283)	691	118	65.61	+	1.8	1.61e-05
embryo development ending in birth or egg hatching (GO:0009792)	574	98	54.5	+	1.8	0.000388
embryonic organ development (GO:0048568)	422	72	40.07	+	1.8	0.0237
chordate embryonic development (GO:0043009)	569	97	54.03	+	1.8	0.000487
regulation of neurogenesis (GO:0050767)	710	121	67.42	+	1.79	1.12e-05
response to organonitrogen compound (GO:0010243)	881	150	83.65	+	1.79	1.15e-07
regulation of hydrolase activity (GO:0051336)	1411	240	133.98	+	1.79	4.39e-14
regulation of phosphorylation (GO:0042325)	1482	252	140.72	+	1.79	5.87e-15
positive regulation of transport (GO:0051050)	977	166	92.77	+	1.79	1.02e-08
positive regulation of apoptotic process (GO:0043065)	601	102	57.07	+	1.79	0.000274
leukocyte activation involved in immune response (GO:0002366)	607	103	57.64	+	1.79	0.000236
myeloid cell activation involved in immune response (GO:0002275)	513	87	48.71	+	1.79	0.00288
neutrophil activation involved in immune response (GO:0002283)	484	82	45.96	+	1.78	0.00647
leukocyte activation (GO:0045321)	880	149	83.56	+	1.78	2e-07
movement of cell or subcellular component (GO:0006928)	1424	241	135.21	+	1.78	6.6e-14
regulation of localization (GO:0032879)	2603	440	247.16	+	1.78	2.08e-29
regulation of hemopoiesis (GO:1903706)	426	72	40.45	+	1.78	0.0325
neutrophil activation (GO:0042119)	492	83	46.72	+	1.78	0.00654
cell development (GO:0048468)	1493	251	141.76	+	1.77	2.71e-14
neutrophil degranulation (GO:0043312)	482	81	45.77	+	1.77	0.0102
positive regulation of programmed cell death (GO:0043068)	607	102	57.64	+	1.77	0.000437
positive regulation of nervous system development (GO:0051962)	477	80	45.29	+	1.77	0.0128
granulocyte activation (GO:0036230)	495	83	47	+	1.77	0.00825
regulation of system process (GO:0044057)	507	85	48.14	+	1.77	0.00616
cellular response to oxygen-containing compound (GO:1901701)	903	151	85.74	+	1.76	3.48e-07
leukocyte degranulation (GO:0043299)	503	84	47.76	+	1.76	0.00831
positive regulation of signaling (GO:0023056)	1622	270	154.01	+	1.75	4.05e-15
regulation of anatomical structure size (GO:0090066)	469	78	44.53	+	1.75	0.0232
regulation of nervous system development (GO:0051960)	800	133	75.96	+	1.75	7.58e-06
positive regulation of cell communication (GO:0010647)	1615	268	153.35	+	1.75	8.29e-15
response to nitrogen compound (GO:1901698)	995	165	94.48	+	1.75	7.69e-08
neuron projection development (GO:0031175)	624	103	59.25	+	1.74	0.000868
vesicle-mediated transport (GO:0016192)	1734	286	164.65	+	1.74	1.02e-15
myeloid leukocyte mediated immunity (GO:0002444)	516	85	49	+	1.73	0.0121
regulation of intracellular signal transduction (GO:1902531)	1791	295	170.06	+	1.73	2.89e-16
positive regulation of protein transport (GO:0051222)	486	80	46.15	+	1.73	0.0252
positive regulation of cell proliferation (GO:0008284)	876	144	83.18	+	1.73	3.09e-06
regulation of phosphate metabolic process (GO:0019220)	1716	281	162.94	+	1.72	5.77e-15
regulation of secretion (GO:0051046)	727	119	69.03	+	1.72	0.000137
regulation of signal transduction (GO:0009966)	3068	502	291.32	+	1.72	3.29e-31
neutrophil mediated immunity (GO:0002446)	496	81	47.1	+	1.72	0.0292
central nervous system development (GO:0007417)	888	145	84.32	+	1.72	4.13e-06
regulation of phosphorus metabolic process (GO:0051174)	1730	282	164.27	+	1.72	8.95e-15
regulation of secretion by cell (GO:1903530)	672	109	63.81	+	1.71	0.000861
positive regulation of response to stimulus (GO:0048584)	2110	342	200.35	+	1.71	1.77e-18
response to oxygen-containing compound (GO:1901700)	1444	234	137.11	+	1.71	2.34e-11
response to hormone (GO:0009725)	883	143	83.84	+	1.71	9.22e-06
animal organ development (GO:0048513)	2990	483	283.91	+	1.7	2.22e-28
brain development (GO:0007420)	688	111	65.33	+	1.7	0.000852
regulation of signaling (GO:0023051)	3410	550	323.79	+	1.7	1.88e-33
positive regulation of catalytic activity (GO:0043085)	1655	266	157.15	+	1.69	5.63e-13
regulation of protein transport (GO:0051223)	784	126	74.44	+	1.69	0.000142
regulation of cytokine production (GO:0001817)	623	100	59.16	+	1.69	0.00458
regulation of cell communication (GO:0010646)	3360	539	319.04	+	1.69	5.97e-32
positive regulation of protein modification process (GO:0031401)	1198	192	113.75	+	1.69	2.47e-08
cellular response to hormone stimulus (GO:0032870)	593	95	56.31	+	1.69	0.0095
neurogenesis (GO:0022008)	1511	240	143.47	+	1.67	8.28e-11
generation of neurons (GO:0048699)	1417	225	134.55	+	1.67	6.56e-10
regulation of peptide transport (GO:0090087)	813	129	77.2	+	1.67	0.000195
neuron development (GO:0048666)	763	121	72.45	+	1.67	0.000553
regulation of cellular component biogenesis (GO:0044087)	852	135	80.9	+	1.67	9.88e-05
regulation of transferase activity (GO:0051338)	1018	161	96.66	+	1.67	4.08e-06
system development (GO:0048731)	4199	663	398.71	+	1.66	6.49e-40
regulation of cellular protein localization (GO:1903827)	617	97	58.59	+	1.66	0.016
response to abiotic stimulus (GO:0009628)	1115	175	105.87	+	1.65	1.2e-06
cellular response to organic substance (GO:0071310)	2157	338	204.81	+	1.65	5.9e-16
regulation of protein localization (GO:0032880)	1036	162	98.37	+	1.65	7.85e-06
cell surface receptor signaling pathway (GO:0007166)	2236	349	212.31	+	1.64	2.3e-16
regulation of cellular localization (GO:0060341)	904	141	85.84	+	1.64	0.000118
regulation of protein modification process (GO:0031399)	1744	272	165.6	+	1.64	8.68e-12
positive regulation of transferase activity (GO:0051347)	687	107	65.23	+	1.64	0.00725
positive regulation of protein metabolic process (GO:0051247)	1603	249	152.21	+	1.64	2.67e-10
response to organic cyclic compound (GO:0014070)	882	137	83.75	+	1.64	0.000242
regulation of catalytic activity (GO:0050790)	2505	389	237.86	+	1.64	1.89e-18
neuron differentiation (GO:0030182)	948	147	90.02	+	1.63	8.23e-05
positive regulation of cellular component organization (GO:0051130)	1182	183	112.23	+	1.63	1.26e-06
regulation of establishment of protein localization (GO:0070201)	828	128	78.62	+	1.63	0.000902
regulation of response to stimulus (GO:0048583)	4003	617	380.1	+	1.62	4.89e-33
response to lipid (GO:0033993)	844	130	80.14	+	1.62	0.00087
protein phosphorylation (GO:0006468)	974	150	92.48	+	1.62	8.83e-05
regulation of cellular component organization (GO:0051128)	2338	360	222	+	1.62	4.2e-16
cellular response to chemical stimulus (GO:0070887)	2628	404	249.54	+	1.62	1.35e-18
regulation of cell death (GO:0010941)	1627	250	154.49	+	1.62	7.41e-10
response to organic substance (GO:0010033)	2780	427	263.97	+	1.62	6.37e-20
positive regulation of cellular protein metabolic process (GO:0032270)	1512	231	143.57	+	1.61	1.3e-08
regulation of response to stress (GO:0080134)	1388	212	131.79	+	1.61	1.24e-07
epithelium development (GO:0060429)	1068	163	101.41	+	1.61	3.58e-05
nervous system development (GO:0007399)	2228	340	211.56	+	1.61	2.24e-14
negative regulation of catalytic activity (GO:0043086)	892	136	84.7	+	1.61	0.000771
multicellular organism development (GO:0007275)	4786	727	454.44	+	1.6	2.59e-39
positive regulation of molecular function (GO:0044093)	1971	298	187.15	+	1.59	1.41e-11
negative regulation of cellular protein metabolic process (GO:0032269)	1061	160	100.75	+	1.59	0.000109
negative regulation of protein metabolic process (GO:0051248)	1118	168	106.16	+	1.58	5.83e-05
cellular developmental process (GO:0048869)	3596	540	341.45	+	1.58	8.64e-25
regulation of transport (GO:0051049)	1868	280	177.37	+	1.58	3.24e-10
cell differentiation (GO:0030154)	3522	527	334.42	+	1.58	1.27e-23
negative regulation of molecular function (GO:0044092)	1172	175	111.28	+	1.57	4.29e-05
regulation of apoptotic process (GO:0042981)	1495	223	141.95	+	1.57	2.91e-07
regulation of programmed cell death (GO:0043067)	1510	225	143.38	+	1.57	2.58e-07
regulation of immune system process (GO:0002682)	1483	220	140.82	+	1.56	6.47e-07
positive regulation of transcription from RNA polymerase II promoter (GO:0045944)	1115	165	105.87	+	1.56	0.000217
intracellular signal transduction (GO:0035556)	1609	238	152.78	+	1.56	1.27e-07
anatomical structure development (GO:0048856)	5141	760	488.15	+	1.56	1.38e-37
negative regulation of cellular process (GO:0048523)	4442	655	421.78	+	1.55	5.57e-30
immune effector process (GO:0002252)	977	144	92.77	+	1.55	0.00218
regulation of protein metabolic process (GO:0051246)	2717	394	257.99	+	1.53	8.46e-14
negative regulation of cell death (GO:0060548)	945	137	89.73	+	1.53	0.0102
membrane organization (GO:0061024)	897	130	85.17	+	1.53	0.0194
regulation of cellular protein metabolic process (GO:0032268)	2520	364	239.28	+	1.52	3.84e-12
developmental process (GO:0032502)	5506	795	522.81	+	1.52	2.43e-36
positive regulation of cellular metabolic process (GO:0031325)	3050	440	289.61	+	1.52	1.24e-15
negative regulation of biological process (GO:0048519)	4931	709	468.21	+	1.51	4.65e-30
positive regulation of nucleic acid-templated transcription (GO:1903508)	1433	206	136.07	+	1.51	3.33e-05
positive regulation of transcription, DNA-templated (GO:0045893)	1433	206	136.07	+	1.51	3.33e-05
positive regulation of RNA biosynthetic process (GO:1902680)	1434	206	136.16	+	1.51	3.52e-05
positive regulation of RNA metabolic process (GO:0051254)	1504	216	142.81	+	1.51	1.44e-05
response to drug (GO:0042493)	913	131	86.69	+	1.51	0.0288
plasma membrane bounded cell projection organization (GO:0120036)	1039	149	98.66	+	1.51	0.00623
positive regulation of cellular process (GO:0048522)	4976	713	472.49	+	1.51	7.86e-30
positive regulation of nitrogen compound metabolic process (GO:0051173)	2940	421	279.16	+	1.51	3.52e-14
positive regulation of metabolic process (GO:0009893)	3273	468	310.78	+	1.51	2.78e-16
regulation of molecular function (GO:0065009)	3378	483	320.75	+	1.51	5.28e-17
positive regulation of macromolecule metabolic process (GO:0010604)	3032	433	287.9	+	1.5	1.55e-14
positive regulation of biosynthetic process (GO:0009891)	1848	263	175.47	+	1.5	4.48e-07
positive regulation of biological process (GO:0048518)	5549	789	526.89	+	1.5	1.64e-33
response to cytokine (GO:0034097)	964	137	91.53	+	1.5	0.0276
positive regulation of cellular biosynthetic process (GO:0031328)	1818	257	172.62	+	1.49	1.46e-06
positive regulation of gene expression (GO:0010628)	1813	256	172.15	+	1.49	1.77e-06
response to external stimulus (GO:0009605)	1891	267	179.56	+	1.49	6.8e-07
chemical homeostasis (GO:0048878)	972	137	92.29	+	1.48	0.0415
positive regulation of nucleobase-containing compound metabolic process (GO:0045935)	1764	248	167.5	+	1.48	5.27e-06
immune system process (GO:0002376)	2498	351	237.19	+	1.48	6.1e-10
cell projection organization (GO:0030030)	1066	149	101.22	+	1.47	0.0245
positive regulation of macromolecule biosynthetic process (GO:0010557)	1685	235	160	+	1.47	3.11e-05
regulation of biological quality (GO:0065008)	3622	497	343.92	+	1.45	3.25e-14
signaling (GO:0023052)	5269	718	500.31	+	1.44	1.83e-23
negative regulation of nitrogen compound metabolic process (GO:0051172)	2344	318	222.57	+	1.43	6.61e-07
cell communication (GO:0007154)	5367	727	509.61	+	1.43	3.8e-23
signal transduction (GO:0007165)	4877	657	463.09	+	1.42	3.04e-19
negative regulation of cellular metabolic process (GO:0031324)	2511	338	238.43	+	1.42	3.55e-07
response to stress (GO:0006950)	3330	448	316.19	+	1.42	7.29e-11
homeostatic process (GO:0042592)	1470	197	139.58	+	1.41	0.00934
regulation of transcription from RNA polymerase II promoter (GO:0006357)	1985	264	188.48	+	1.4	0.000208
negative regulation of cellular macromolecule biosynthetic process (GO:2000113)	1346	179	127.81	+	1.4	0.0465
negative regulation of biosynthetic process (GO:0009890)	1522	202	144.52	+	1.4	0.0126
negative regulation of macromolecule biosynthetic process (GO:0010558)	1419	188	134.74	+	1.4	0.0333
response to chemical (GO:0042221)	4177	551	396.62	+	1.39	5.29e-13
negative regulation of cellular biosynthetic process (GO:0031327)	1502	198	142.62	+	1.39	0.0247
multicellular organismal process (GO:0032501)	6696	880	635.8	+	1.38	1.91e-26
immune response (GO:0006955)	1619	210	153.73	+	1.37	0.0343
negative regulation of macromolecule metabolic process (GO:0010605)	2535	328	240.71	+	1.36	5.03e-05
cellular component organization (GO:0016043)	5299	681	503.16	+	1.35	3.97e-15
response to stimulus (GO:0050896)	8026	1030	762.09	+	1.35	3.34e-30
localization (GO:0051179)	5447	698	517.21	+	1.35	2.02e-15
cellular response to stimulus (GO:0051716)	6337	812	601.72	+	1.35	1.01e-19
negative regulation of metabolic process (GO:0009892)	2787	357	264.63	+	1.35	2.67e-05
cellular protein modification process (GO:0006464)	3155	398	299.58	+	1.33	1.55e-05
protein modification process (GO:0036211)	3155	398	299.58	+	1.33	1.55e-05
cellular component organization or biogenesis (GO:0071840)	5521	688	524.24	+	1.31	3.06e-12
transport (GO:0006810)	4357	527	413.71	+	1.27	6.36e-06
macromolecule modification (GO:0043412)	3437	414	326.35	+	1.27	0.00138
protein metabolic process (GO:0019538)	4404	529	418.17	+	1.27	1.59e-05
establishment of localization (GO:0051234)	4466	536	424.06	+	1.26	1.32e-05
regulation of cellular process (GO:0050794)	10676	1272	1013.72	+	1.25	1.48e-27
regulation of primary metabolic process (GO:0080090)	6053	718	574.75	+	1.25	2.14e-08
regulation of cellular metabolic process (GO:0031323)	6163	730	585.2	+	1.25	1.59e-08
biological regulation (GO:0065007)	11969	1415	1136.49	+	1.25	5.57e-34
regulation of biological process (GO:0050789)	11328	1338	1075.63	+	1.24	4.89e-29
cellular protein metabolic process (GO:0044267)	3744	442	355.5	+	1.24	0.00429
regulation of nitrogen compound metabolic process (GO:0051171)	5891	695	559.37	+	1.24	1.88e-07
regulation of metabolic process (GO:0019222)	6604	777	627.07	+	1.24	6.55e-09
regulation of macromolecule metabolic process (GO:0060255)	6078	715	577.12	+	1.24	1.31e-07
organonitrogen compound metabolic process (GO:1901564)	5472	635	519.58	+	1.22	4.1e-05
cellular process (GO:0009987)	14968	1633	1421.26	+	1.15	4.73e-24
biological_process (GO:0008150)	17366	1824	1648.95	+	1.11	2.4e-25
sensory perception (GO:0007600)	947	50	89.92	-	0.56	0.0178
Unclassified (UNCLASSIFIED)	3676	174	349.05	-	0.5	0
RNA processing (GO:0006396)	884	38	83.94	-	0.45	7.73e-05
peptide biosynthetic process (GO:0043043)	410	14	38.93	-	0.36	0.0294
detection of stimulus (GO:0051606)	677	23	64.28	-	0.36	1.54e-05
translation (GO:0006412)	383	11	36.37	-	0.3	0.00613
ncRNA metabolic process (GO:0034660)	560	16	53.17	-	0.3	1.35e-05
ribonucleoprotein complex biogenesis (GO:0022613)	468	13	44.44	-	0.29	0.000199
ribosome biogenesis (GO:0042254)	333	9	31.62	-	0.28	0.0168
ncRNA processing (GO:0034470)	400	10	37.98	-	0.26	0.000522
detection of chemical stimulus (GO:0009593)	509	9	48.33	-	< 0.2	2.89e-08
detection of stimulus involved in sensory perception (GO:0050906)	526	7	49.95	-	< 0.2	1.96e-10
tRNA metabolic process (GO:0006399)	185	2	17.57	-	< 0.2	0.033
sensory perception of chemical stimulus (GO:0007606)	534	5	50.7	-	< 0.2	1.49e-12
sensory perception of smell (GO:0007608)	458	4	43.49	-	< 0.2	1.23e-10
keratinization (GO:0031424)	227	1	21.55	-	< 0.2	7.63e-05

## Sheet: GO cellular component 
GO cellular component complete	Homo sapiens - REFLIST (21042)	Client Text Box Input (1998)	Client Text Box Input (expected)	Client Text Box Input (over/under)	Client Text Box Input (fold Enrichment)	Client Text Box Input (P-value)
complex of collagen trimers (GO:0098644)	20	10	1.9	+	5.27	0.0402
extracellular matrix component (GO:0044420)	122	52	11.58	+	4.49	2.77e-15
integrin complex (GO:0008305)	33	14	3.13	+	4.47	0.00725
basement membrane (GO:0005604)	95	37	9.02	+	4.1	2.81e-09
protein complex involved in cell adhesion (GO:0098636)	36	14	3.42	+	4.1	0.0189
platelet alpha granule (GO:0031091)	91	32	8.64	+	3.7	9.96e-07
basal part of cell (GO:0045178)	47	16	4.46	+	3.59	0.024
proteinaceous extracellular matrix (GO:0005578)	366	122	34.75	+	3.51	2.17e-28
platelet alpha granule lumen (GO:0031093)	67	22	6.36	+	3.46	0.00128
actomyosin (GO:0042641)	68	22	6.46	+	3.41	0.00162
actin filament bundle (GO:0032432)	62	20	5.89	+	3.4	0.00505
contractile actin filament bundle (GO:0097517)	56	18	5.32	+	3.39	0.0158
stress fiber (GO:0001725)	56	18	5.32	+	3.39	0.0158
collagen trimer (GO:0005581)	92	29	8.74	+	3.32	6.16e-05
focal adhesion (GO:0005925)	394	116	37.41	+	3.1	1.98e-22
endoplasmic reticulum lumen (GO:0005788)	299	88	28.39	+	3.1	1.53e-16
cell-substrate adherens junction (GO:0005924)	397	116	37.7	+	3.08	3.65e-22
cell-substrate junction (GO:0030055)	402	117	38.17	+	3.07	3.1e-22
sarcolemma (GO:0042383)	122	35	11.58	+	3.02	2.67e-05
lysosomal lumen (GO:0043202)	93	26	8.83	+	2.94	0.00264
tertiary granule membrane (GO:0070821)	72	20	6.84	+	2.93	0.0416
extracellular matrix (GO:0031012)	546	151	51.84	+	2.91	4.65e-27
caveola (GO:0005901)	77	21	7.31	+	2.87	0.0347
lamellipodium (GO:0030027)	188	51	17.85	+	2.86	1.21e-07
adherens junction (GO:0005912)	507	134	48.14	+	2.78	5.51e-22
anchoring junction (GO:0070161)	525	136	49.85	+	2.73	1.44e-21
membrane raft (GO:0045121)	303	76	28.77	+	2.64	1.57e-10
membrane microdomain (GO:0098857)	304	76	28.87	+	2.63	1.84e-10
plasma membrane raft (GO:0044853)	97	24	9.21	+	2.61	0.0447
cell leading edge (GO:0031252)	376	90	35.7	+	2.52	1.21e-11
membrane region (GO:0098589)	381	90	36.18	+	2.49	2.52e-11
leading edge membrane (GO:0031256)	149	35	14.15	+	2.47	0.00257
plasma membrane protein complex (GO:0098797)	243	54	23.07	+	2.34	3.03e-05
plasma membrane receptor complex (GO:0098802)	176	39	16.71	+	2.33	0.00273
ruffle (GO:0001726)	164	36	15.57	+	2.31	0.00807
receptor complex (GO:0043235)	323	69	30.67	+	2.25	1.75e-06
vacuolar lumen (GO:0005775)	169	36	16.05	+	2.24	0.0152
secretory granule membrane (GO:0030667)	303	63	28.77	+	2.19	2.38e-05
cell-cell junction (GO:0005911)	431	85	40.92	+	2.08	9.66e-07
basolateral plasma membrane (GO:0016323)	212	41	20.13	+	2.04	0.0353
contractile fiber part (GO:0044449)	208	40	19.75	+	2.03	0.0496
cell surface (GO:0009986)	807	154	76.63	+	2.01	1.46e-12
cell junction (GO:0030054)	1221	231	115.94	+	1.99	1.26e-19
actin cytoskeleton (GO:0015629)	469	87	44.53	+	1.95	1e-05
endocytic vesicle (GO:0030139)	280	51	26.59	+	1.92	0.0194
apical part of cell (GO:0045177)	369	65	35.04	+	1.86	0.00409
lytic vacuole (GO:0000323)	663	116	62.95	+	1.84	9.04e-07
lysosome (GO:0005764)	663	116	62.95	+	1.84	9.04e-07
whole membrane (GO:0098805)	1619	275	153.73	+	1.79	1.98e-17
cytoplasmic vesicle lumen (GO:0060205)	336	57	31.9	+	1.79	0.0449
vesicle lumen (GO:0031983)	337	57	32	+	1.78	0.0485
secretory granule (GO:0030141)	832	140	79	+	1.77	1.92e-07
vacuolar part (GO:0044437)	554	93	52.6	+	1.77	0.000276
vacuole (GO:0005773)	762	127	72.35	+	1.76	2.48e-06
secretory vesicle (GO:0099503)	949	158	90.11	+	1.75	2.56e-08
cytoplasmic vesicle membrane (GO:0030659)	739	121	70.17	+	1.72	1.59e-05
plasma membrane region (GO:0098590)	994	162	94.38	+	1.72	6.66e-08
intrinsic component of plasma membrane (GO:0031226)	1683	274	159.81	+	1.71	5.54e-15
cytoplasmic vesicle part (GO:0044433)	1432	233	135.97	+	1.71	2.75e-12
vesicle membrane (GO:0012506)	757	123	71.88	+	1.71	1.83e-05
plasma membrane part (GO:0044459)	2707	438	257.04	+	1.7	5.68e-26
integral component of plasma membrane (GO:0005887)	1621	260	153.92	+	1.69	2.66e-13
Golgi subcompartment (GO:0098791)	797	127	75.68	+	1.68	3.11e-05
Golgi apparatus (GO:0005794)	1492	236	141.67	+	1.67	3.42e-11
cytoplasmic vesicle (GO:0031410)	2212	348	210.04	+	1.66	1.21e-17
intracellular vesicle (GO:0097708)	2215	348	210.32	+	1.65	1.49e-17
endoplasmic reticulum part (GO:0044432)	1295	203	122.96	+	1.65	6.01e-09
side of membrane (GO:0098552)	501	78	47.57	+	1.64	0.0341
Golgi membrane (GO:0000139)	708	110	67.23	+	1.64	0.000888
dendrite (GO:0030425)	496	77	47.1	+	1.63	0.042
synapse (GO:0045202)	844	130	80.14	+	1.62	0.000135
perinuclear region of cytoplasm (GO:0048471)	669	103	63.52	+	1.62	0.00295
endoplasmic reticulum (GO:0005783)	1786	274	169.59	+	1.62	7.13e-12
extracellular exosome (GO:0070062)	2729	418	259.13	+	1.61	5.86e-20
extracellular vesicle (GO:1903561)	2747	420	260.84	+	1.61	6.2e-20
extracellular organelle (GO:0043230)	2749	420	261.03	+	1.61	7.09e-20
Golgi apparatus part (GO:0044431)	932	142	88.5	+	1.6	6.43e-05
somatodendritic compartment (GO:0036477)	697	106	66.18	+	1.6	0.00358
vesicle (GO:0031982)	4228	625	401.46	+	1.56	3.6e-29
bounding membrane of organelle (GO:0098588)	1992	294	189.15	+	1.55	6.37e-11
extracellular space (GO:0005615)	3729	550	354.08	+	1.55	2.51e-24
endosome (GO:0005768)	859	126	81.56	+	1.54	0.00244
extracellular region part (GO:0044421)	3942	577	374.3	+	1.54	4.25e-25
endomembrane system (GO:0012505)	4327	633	410.86	+	1.54	2.13e-28
neuron projection (GO:0043005)	1120	162	106.35	+	1.52	0.000186
cell projection (GO:0042995)	1928	274	183.07	+	1.5	2.95e-08
plasma membrane bounded cell projection (GO:0120025)	1859	264	176.52	+	1.5	7.86e-08
neuron part (GO:0097458)	1422	201	135.02	+	1.49	2.84e-05
extracellular region (GO:0005576)	4708	647	447.04	+	1.45	8.14e-22
plasma membrane (GO:0005886)	5337	727	506.76	+	1.43	1.13e-24
cell periphery (GO:0071944)	5445	739	517.02	+	1.43	8.47e-25
organelle subcompartment (GO:0031984)	1613	215	153.16	+	1.4	0.000652
organelle membrane (GO:0031090)	2906	355	275.93	+	1.29	0.000579
cytoplasmic part (GO:0044444)	9470	1152	899.2	+	1.28	7.84e-27
cytoplasm (GO:0005737)	11356	1359	1078.29	+	1.26	1.8e-34
membrane part (GO:0044425)	7040	842	668.47	+	1.26	5.15e-13
intrinsic component of membrane (GO:0031224)	5863	684	556.71	+	1.23	3.8e-07
integral component of membrane (GO:0016021)	5740	668	545.03	+	1.23	1.12e-06
membrane (GO:0016020)	9493	1087	901.39	+	1.21	7.23e-14
cytosol (GO:0005829)	4919	554	467.07	+	1.19	0.00494
membrane-bounded organelle (GO:0043227)	12378	1384	1175.33	+	1.18	4.26e-19
organelle (GO:0043226)	13364	1480	1268.95	+	1.17	6.9e-21
intracellular organelle part (GO:0044446)	8878	975	842.99	+	1.16	2.09e-06
intracellular part (GO:0044424)	14205	1557	1348.81	+	1.15	6.96e-22
organelle part (GO:0044422)	9091	996	863.22	+	1.15	1.83e-06
intracellular (GO:0005622)	14549	1578	1381.47	+	1.14	5.28e-20
intracellular organelle (GO:0043229)	12406	1342	1177.99	+	1.14	3.4e-11
intracellular membrane-bounded organelle (GO:0043231)	10674	1124	1013.53	+	1.11	0.000558
cell (GO:0005623)	16720	1759	1587.61	+	1.11	4.93e-21
cell part (GO:0044464)	16692	1756	1584.95	+	1.11	8.37e-21
cellular_component (GO:0005575)	18452	1913	1752.07	+	1.09	1.41e-32
intracellular ribonucleoprotein complex (GO:0030529)	831	34	78.91	-	0.43	7.95e-06
ribonucleoprotein complex (GO:1990904)	834	34	79.19	-	0.43	6.7e-06
mitochondrial inner membrane (GO:0005743)	503	20	47.76	-	0.42	0.00525
Unclassified (UNCLASSIFIED)	2590	85	245.93	-	0.35	0
ribosome (GO:0005840)	249	5	23.64	-	0.21	0.00512
condensed chromosome (GO:0000793)	218	4	20.7	-	< 0.2	0.012
ribosomal subunit (GO:0044391)	193	3	18.33	-	< 0.2	0.0169

## Sheet: Reactome pathway
Reactome pathways	Homo sapiens - REFLIST (21042)	Client Text Box Input (1998)	Client Text Box Input (expected)	Client Text Box Input (over/under)	Client Text Box Input (fold Enrichment)	Client Text Box Input (P-value)
Crosslinking of collagen fibrils (R-HSA-2243919)	11	8	1.04	+	7.66	0.0245
Elastic fibre formation (R-HSA-1566948)	45	27	4.27	+	6.32	2.53e-10
Syndecan interactions (R-HSA-3000170)	27	16	2.56	+	6.24	2.56e-05
Molecules associated with elastic fibres (R-HSA-2129379)	38	22	3.61	+	6.1	8.51e-08
Cell-extracellular matrix interactions (R-HSA-446353)	18	10	1.71	+	5.85	0.0219
Chondroitin sulfate biosynthesis (R-HSA-2022870)	19	10	1.8	+	5.54	0.0345
ECM proteoglycans (R-HSA-3000178)	75	36	7.12	+	5.06	1.91e-11
Defective B3GALTL causes Peters-plus syndrome (PpS) (R-HSA-5083635)	38	18	3.61	+	4.99	9.46e-05
Laminin interactions (R-HSA-3000157)	30	14	2.85	+	4.91	0.00326
O-glycosylation of TSR domain-containing proteins (R-HSA-5173214)	39	18	3.7	+	4.86	0.000138
Collagen biosynthesis and modifying enzymes (R-HSA-1650814)	67	30	6.36	+	4.72	1.62e-08
Integrin cell surface interactions (R-HSA-216083)	85	38	8.07	+	4.71	3.11e-11
Smooth Muscle Contraction (R-HSA-445355)	32	14	3.04	+	4.61	0.00677
Chondroitin sulfate/dermatan sulfate metabolism (R-HSA-1793185)	49	21	4.65	+	4.51	4.13e-05
Non-integrin membrane-ECM interactions (R-HSA-3000171)	59	25	5.6	+	4.46	2.51e-06
Assembly of collagen fibrils and other multimeric structures (R-HSA-2022090)	54	22	5.13	+	4.29	4.65e-05
Collagen formation (R-HSA-1474290)	88	35	8.36	+	4.19	8.19e-09
Extracellular matrix organization (R-HSA-1474244)	292	109	27.73	+	3.93	5.21e-29
Collagen degradation (R-HSA-1442490)	64	23	6.08	+	3.78	0.000207
Semaphorin interactions (R-HSA-373755)	67	21	6.36	+	3.3	0.00597
Platelet degranulation (R-HSA-114608)	125	39	11.87	+	3.29	5.74e-07
Response to elevated platelet cytosolic Ca2+ (R-HSA-76005)	130	40	12.34	+	3.24	5.08e-07
Degradation of the extracellular matrix (R-HSA-1474228)	137	42	13.01	+	3.23	2.06e-07
Cell surface interactions at the vascular wall (R-HSA-202733)	101	30	9.59	+	3.13	0.000169
Glycosaminoglycan metabolism (R-HSA-1630316)	123	32	11.68	+	2.74	0.00114
Platelet activation, signaling and aggregation (R-HSA-76002)	274	71	26.02	+	2.73	2.98e-10
Rho GTPase cycle (R-HSA-194840)	124	31	11.77	+	2.63	0.00376
Diseases of glycosylation (R-HSA-3781865)	139	33	13.2	+	2.5	0.00528
Hemostasis (R-HSA-109582)	586	127	55.64	+	2.28	8.77e-14
Signaling by PDGF (R-HSA-186797)	353	69	33.52	+	2.06	6.95e-05
Axon guidance (R-HSA-422475)	544	105	51.65	+	2.03	4.22e-08
NCAM signaling for neurite out-growth (R-HSA-375165)	259	49	24.59	+	1.99	0.0143
Signaling by VEGF (R-HSA-194138)	315	58	29.91	+	1.94	0.00499
NGF signalling via TRKA from the plasma membrane (R-HSA-187037)	360	64	34.18	+	1.87	0.00481
Signaling by EGFR (R-HSA-177929)	335	59	31.81	+	1.85	0.0152
Gastrin-CREB signalling pathway via PKC and MAPK (R-HSA-881907)	420	70	39.88	+	1.76	0.0142
Signalling by NGF (R-HSA-166520)	439	73	41.68	+	1.75	0.00988
Developmental Biology (R-HSA-1266738)	798	126	75.77	+	1.66	7.63e-05
Innate Immune System (R-HSA-168249)	784	116	74.44	+	1.56	0.00562
Immune System (R-HSA-168256)	1594	209	151.36	+	1.38	0.00373
Signal Transduction (R-HSA-162582)	2449	304	232.54	+	1.31	0.00167
Unclassified (UNCLASSIFIED)	11773	963	1117.88	-	0.86	0
Gene Expression (R-HSA-74160)	1685	92	160	-	0.58	1.82e-06
Cell Cycle (R-HSA-1640170)	568	20	53.93	-	0.37	0.000139
Cell Cycle, Mitotic (R-HSA-69278)	464	16	44.06	-	0.36	0.00158
rRNA processing (R-HSA-72312)	190	3	18.04	-	< 0.2	0.0284
Olfactory Signaling Pathway (R-HSA-381753)	419	1	39.79	-	< 0.2	2.6e-13
